# Supplementary material for: Total synthesis of C19 lipid diols containing a 2,5-disubstituted-3-oxygenated tetrahydrofuran
Source: Royal Society of Chemistry journal article supplement (doi:10.1039/c0ob00754d), 2010-12-20

## ***Supplementary Information***

### **Total synthesis of C<sub>19</sub> lipid diols containing a 2,5-disubstituted-3-oxygenated tetrahydrofuran.**

**Caroline L. Nesbitt and Christopher S. P. McErlean\***

*School of Chemistry, the University of Sydney, NSW, 2006, Australia.*

*Fax: +61 2 9351 3329; Tel: +61 2 9351 3970;*

*E-mail: [christopher.mcerlean@sydney.edu.au](mailto:christopher.mcerlean@sydney.edu.au)*

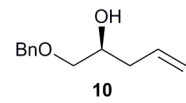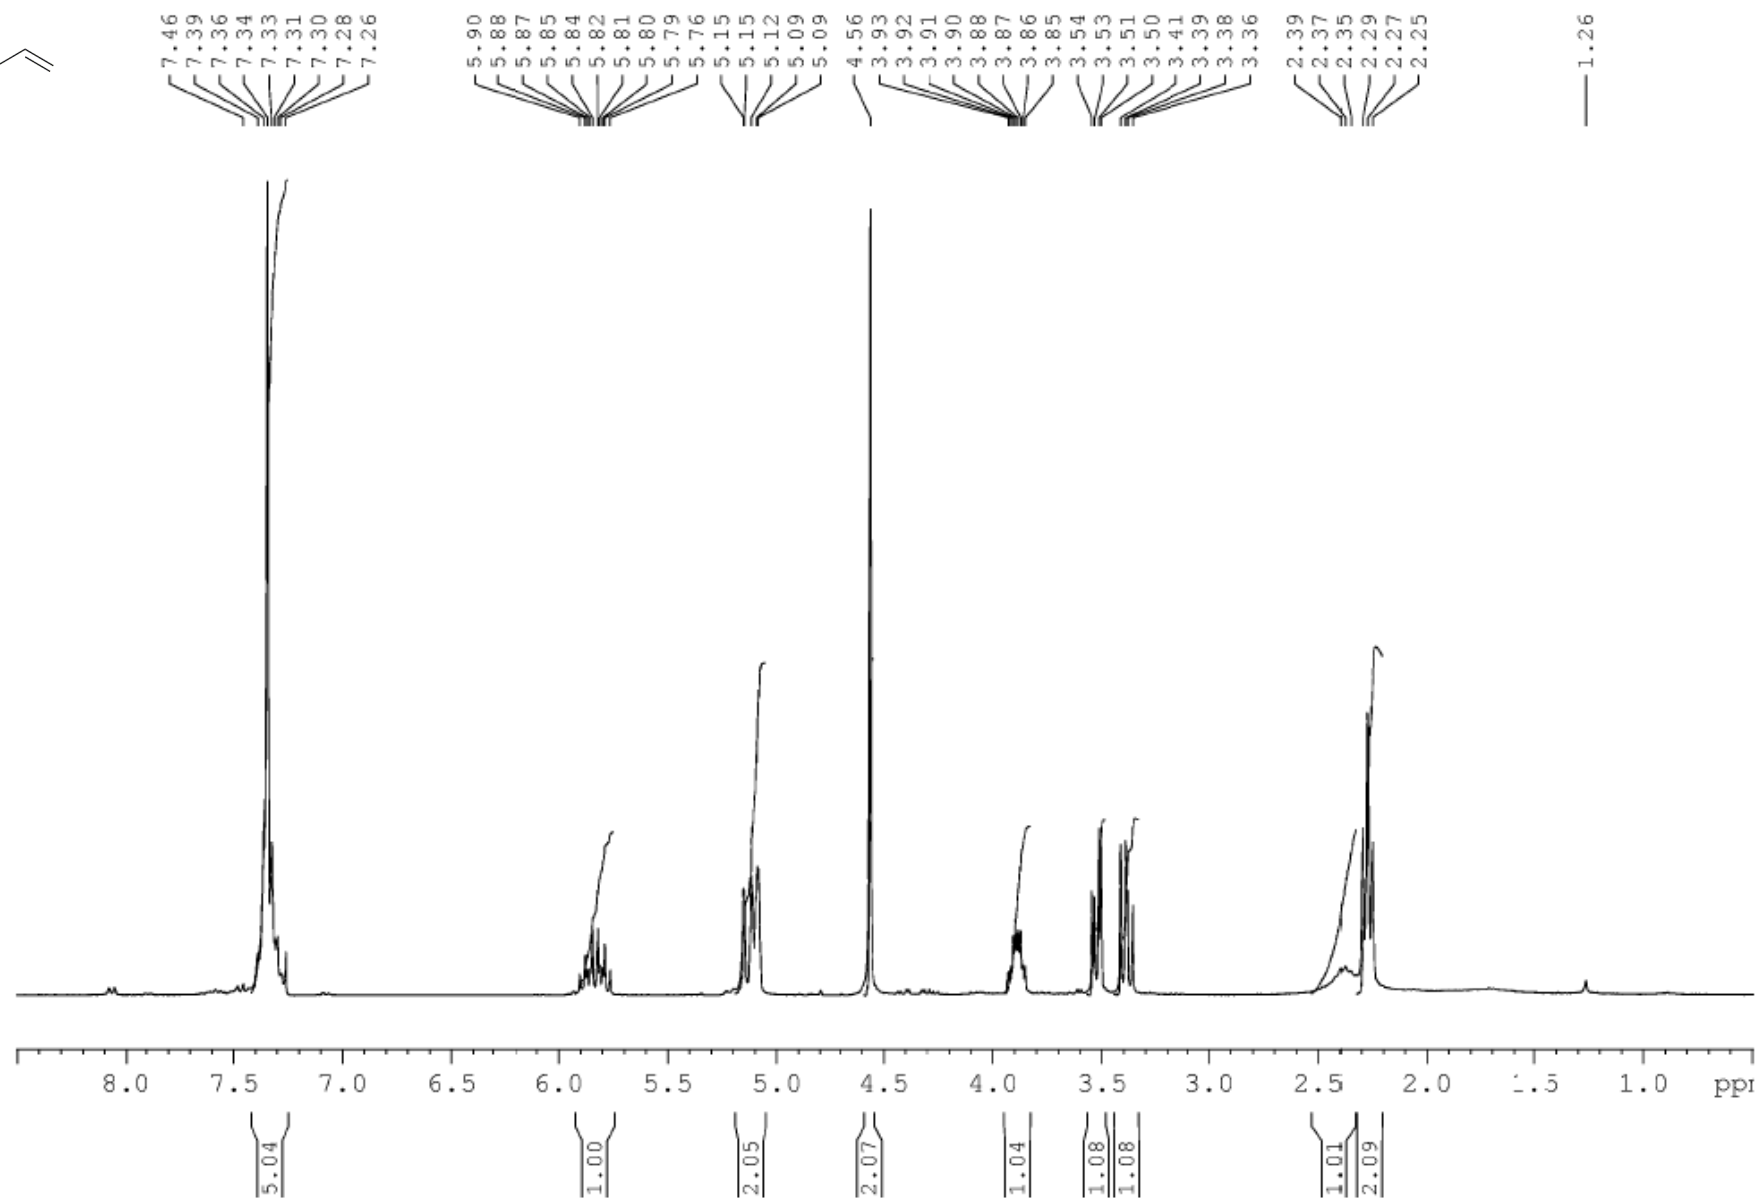

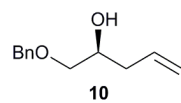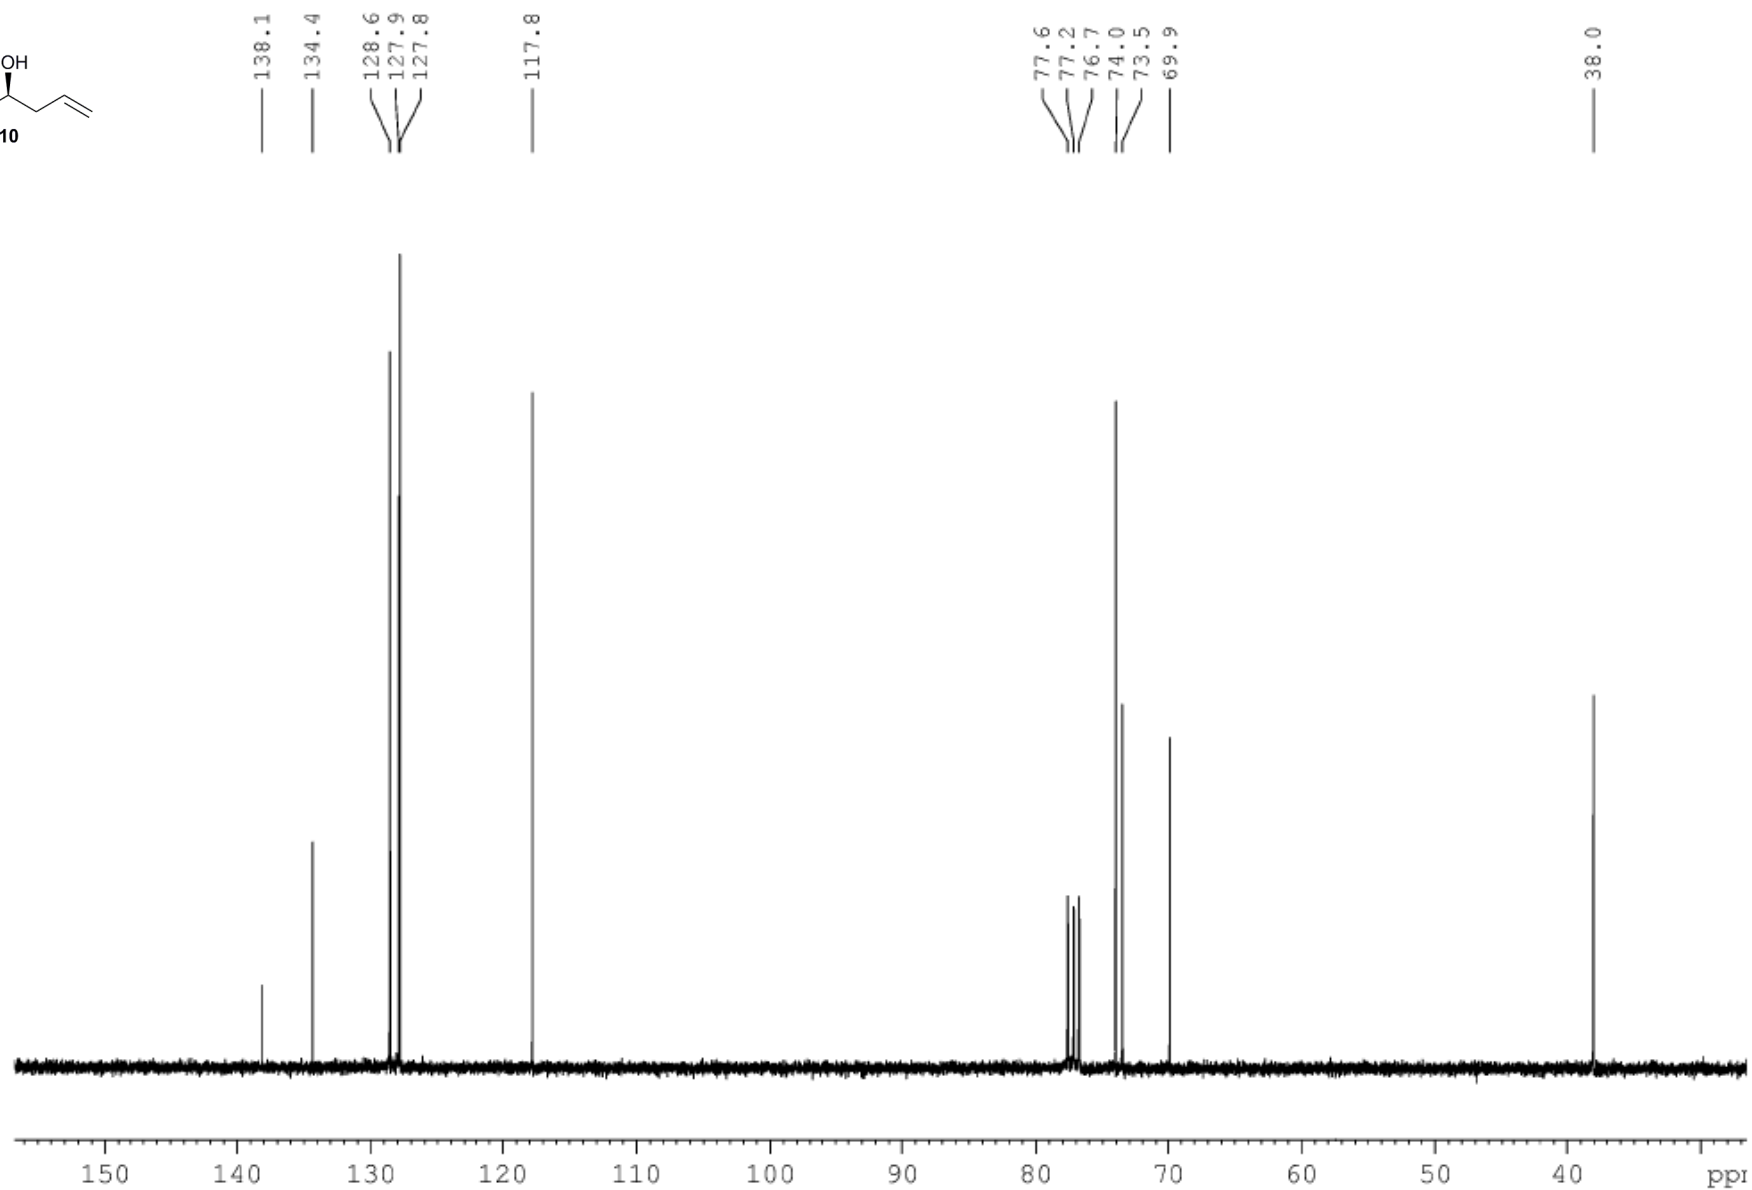

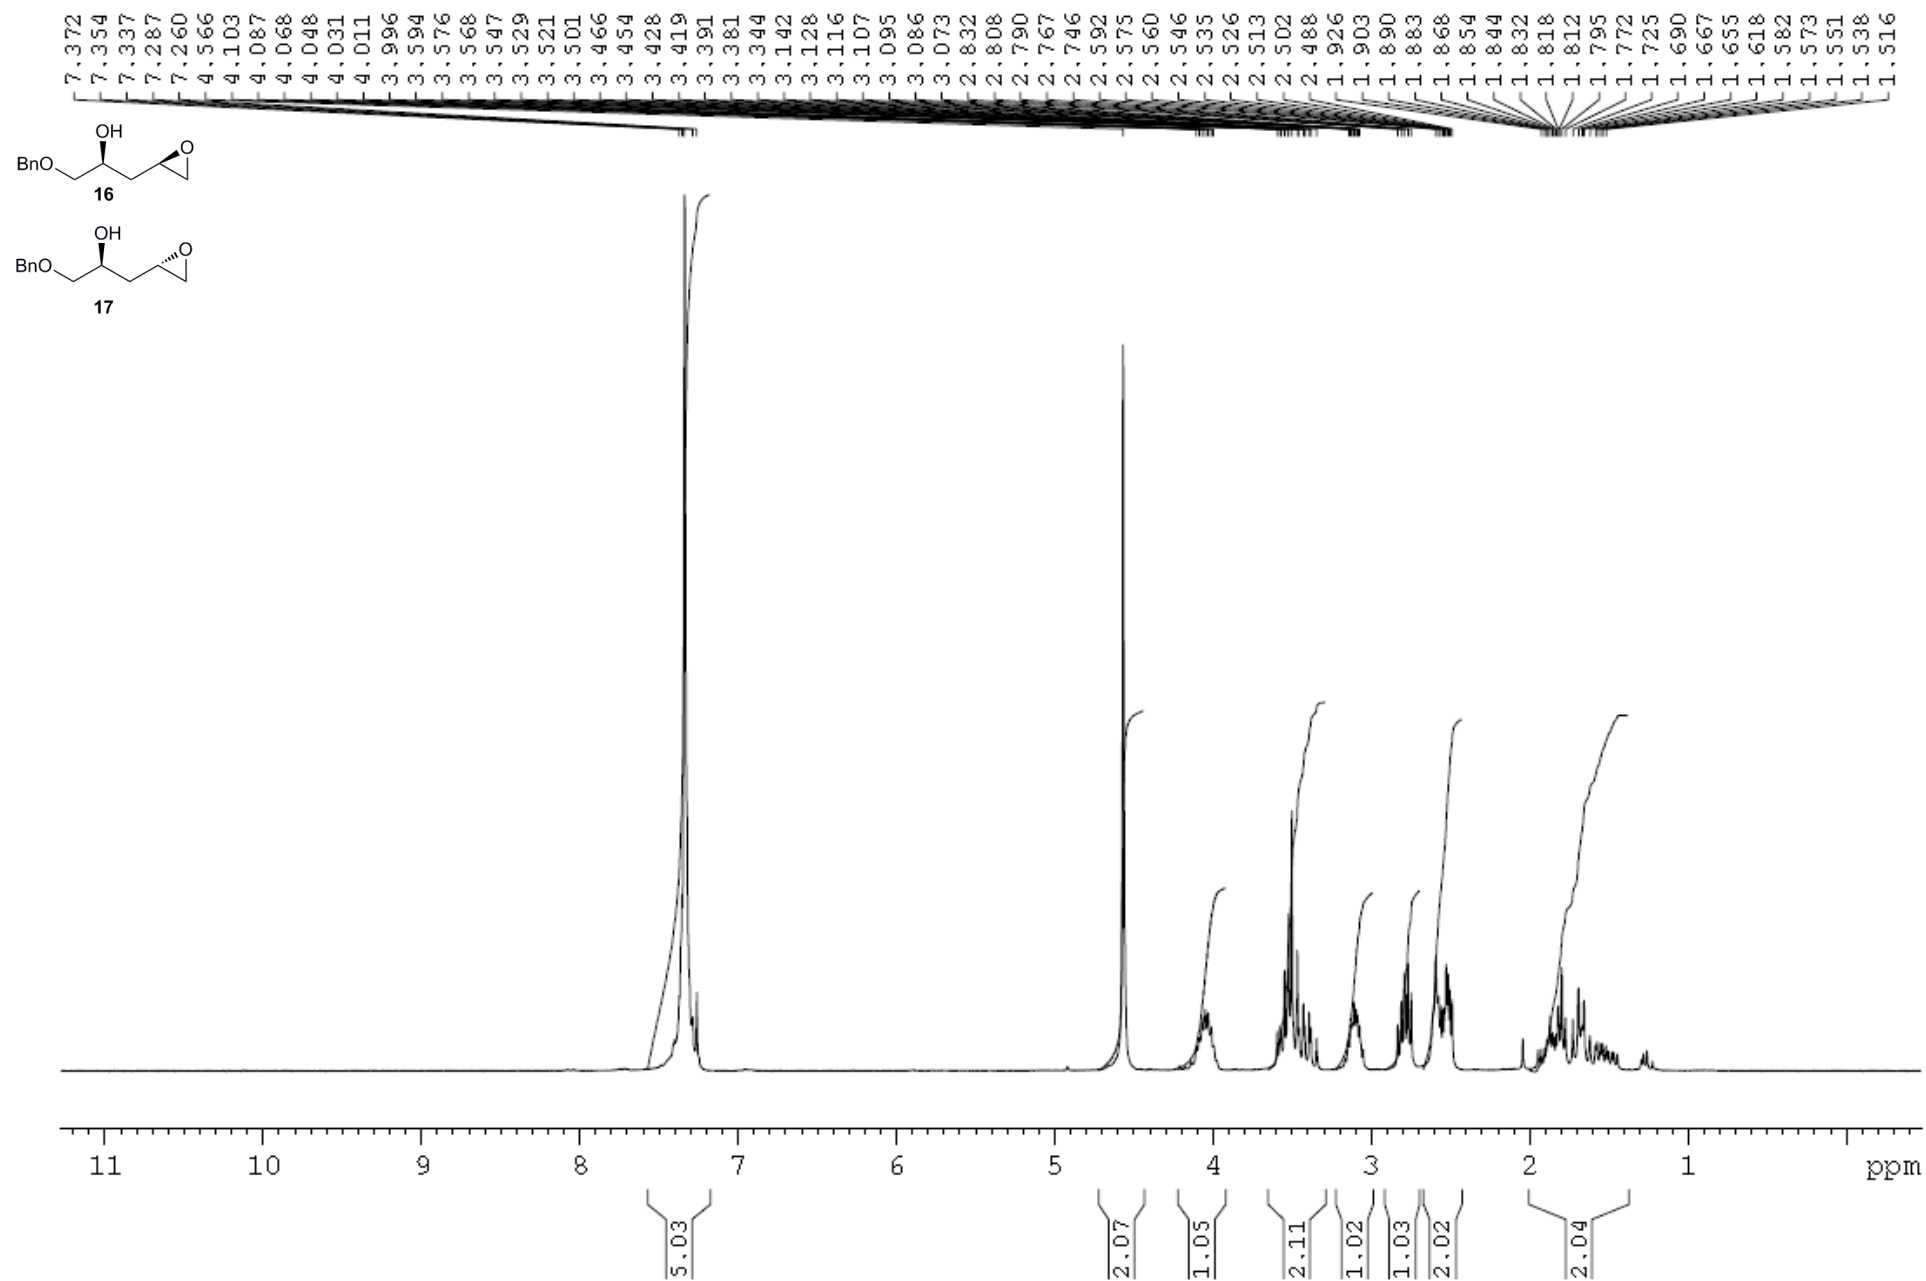

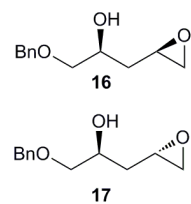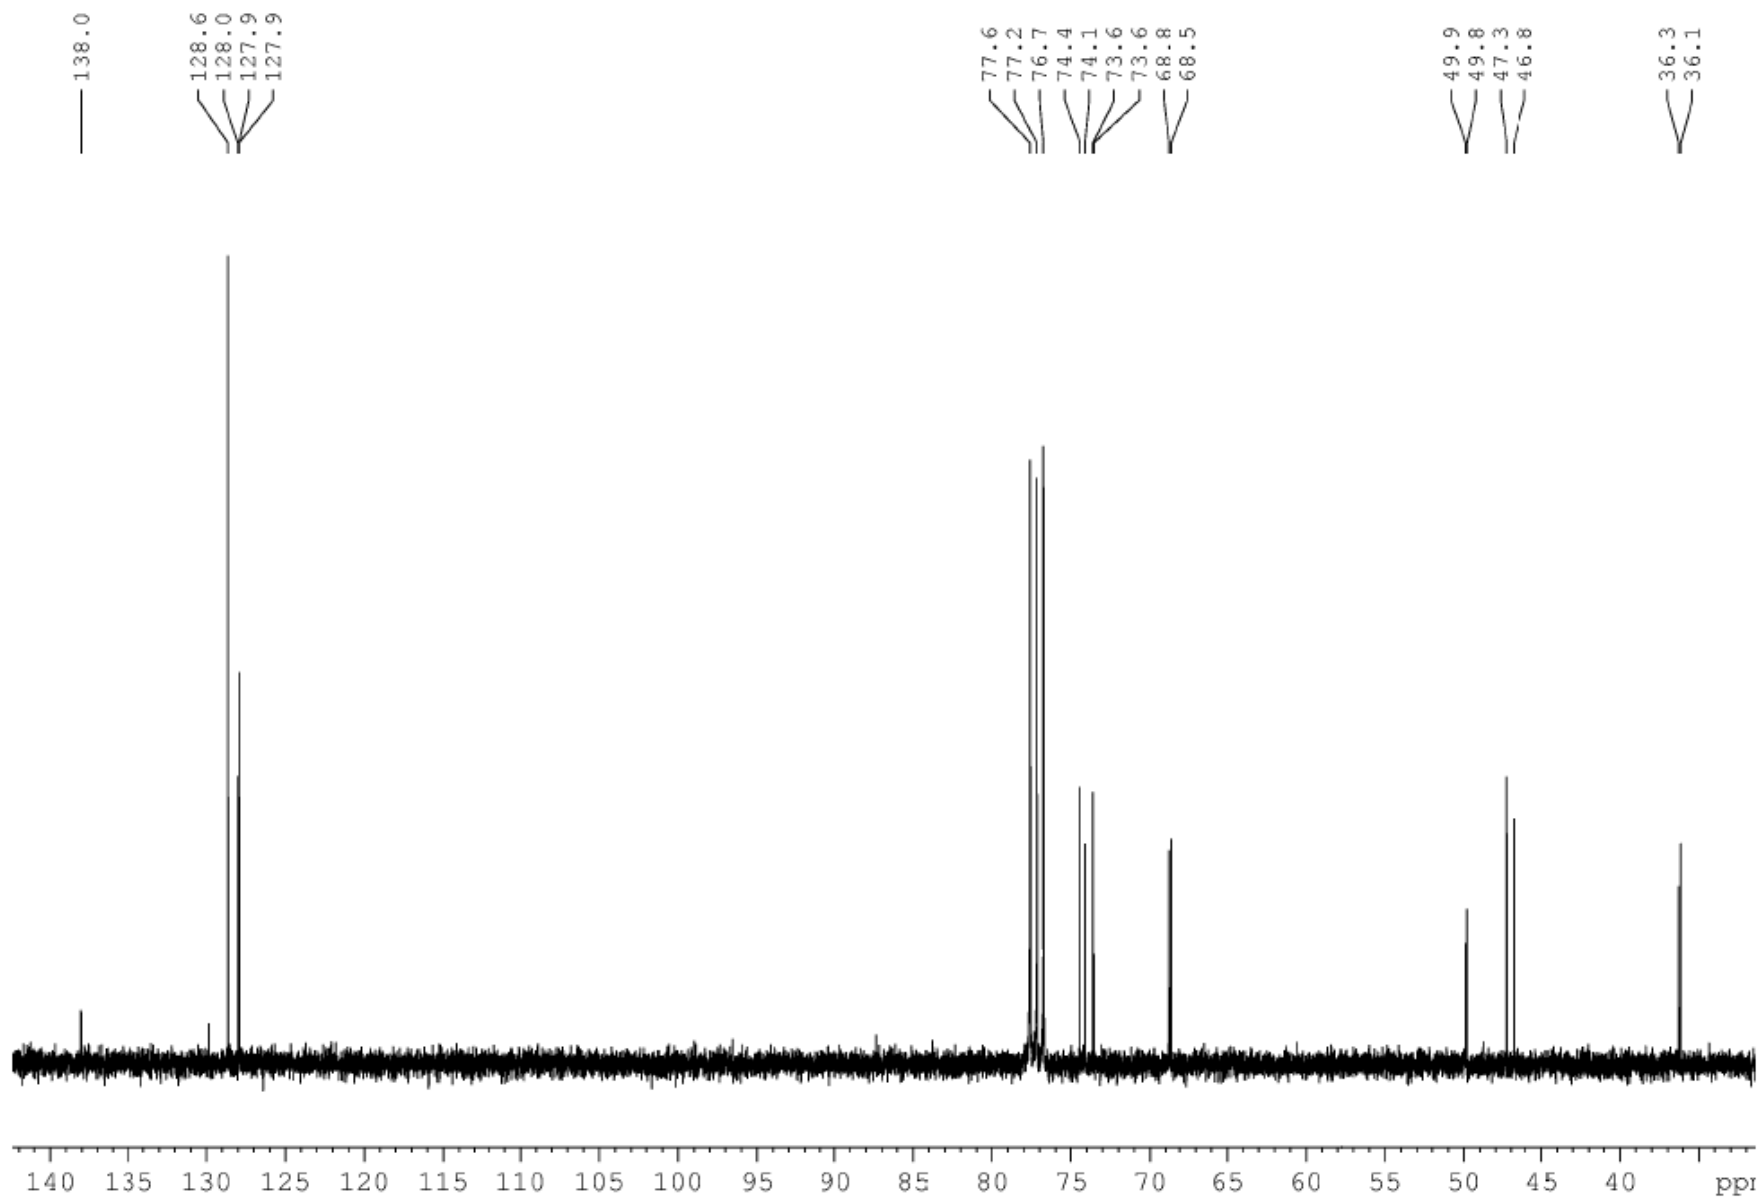

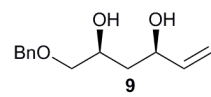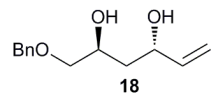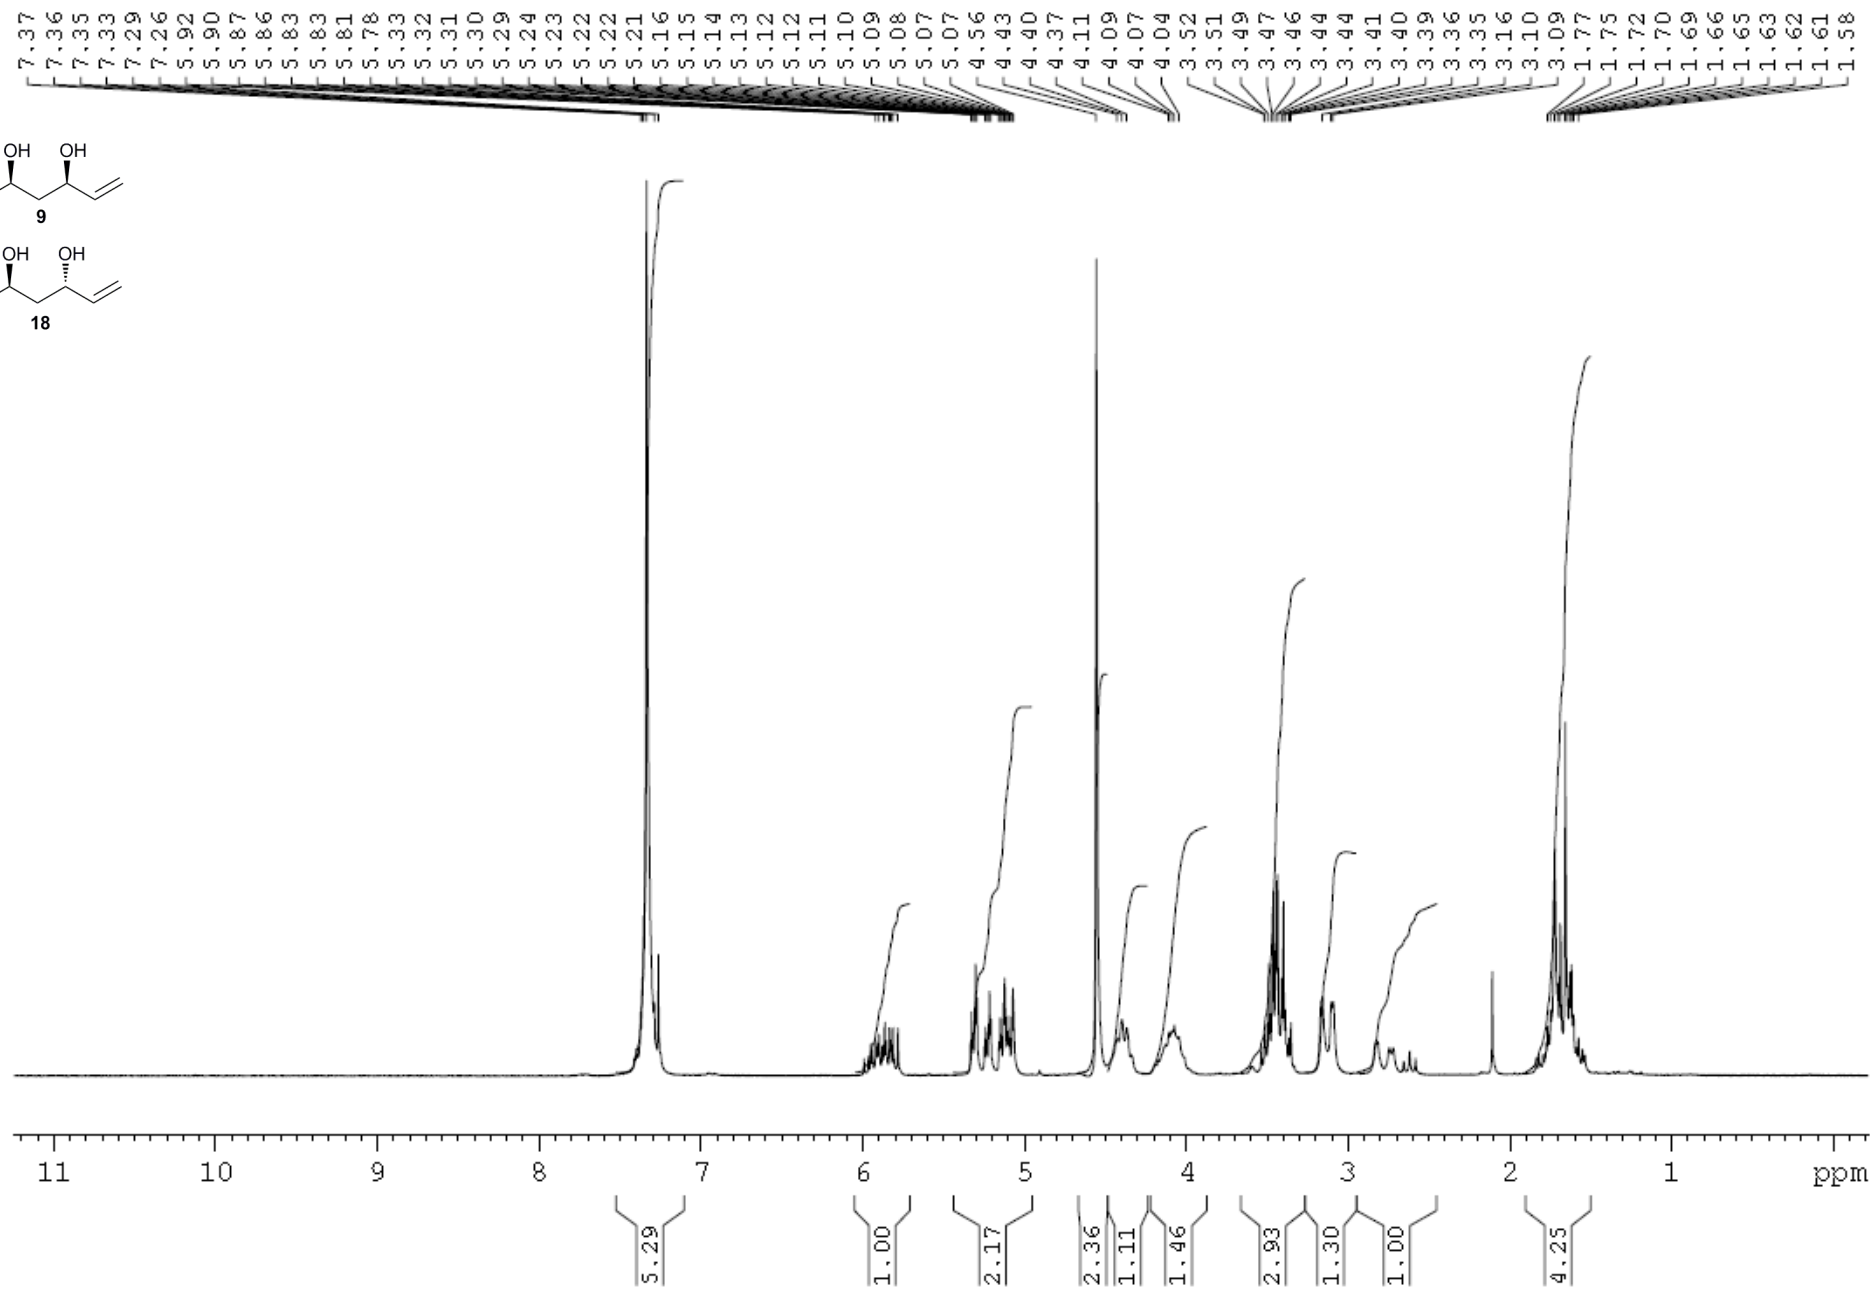

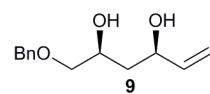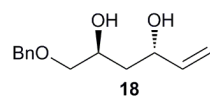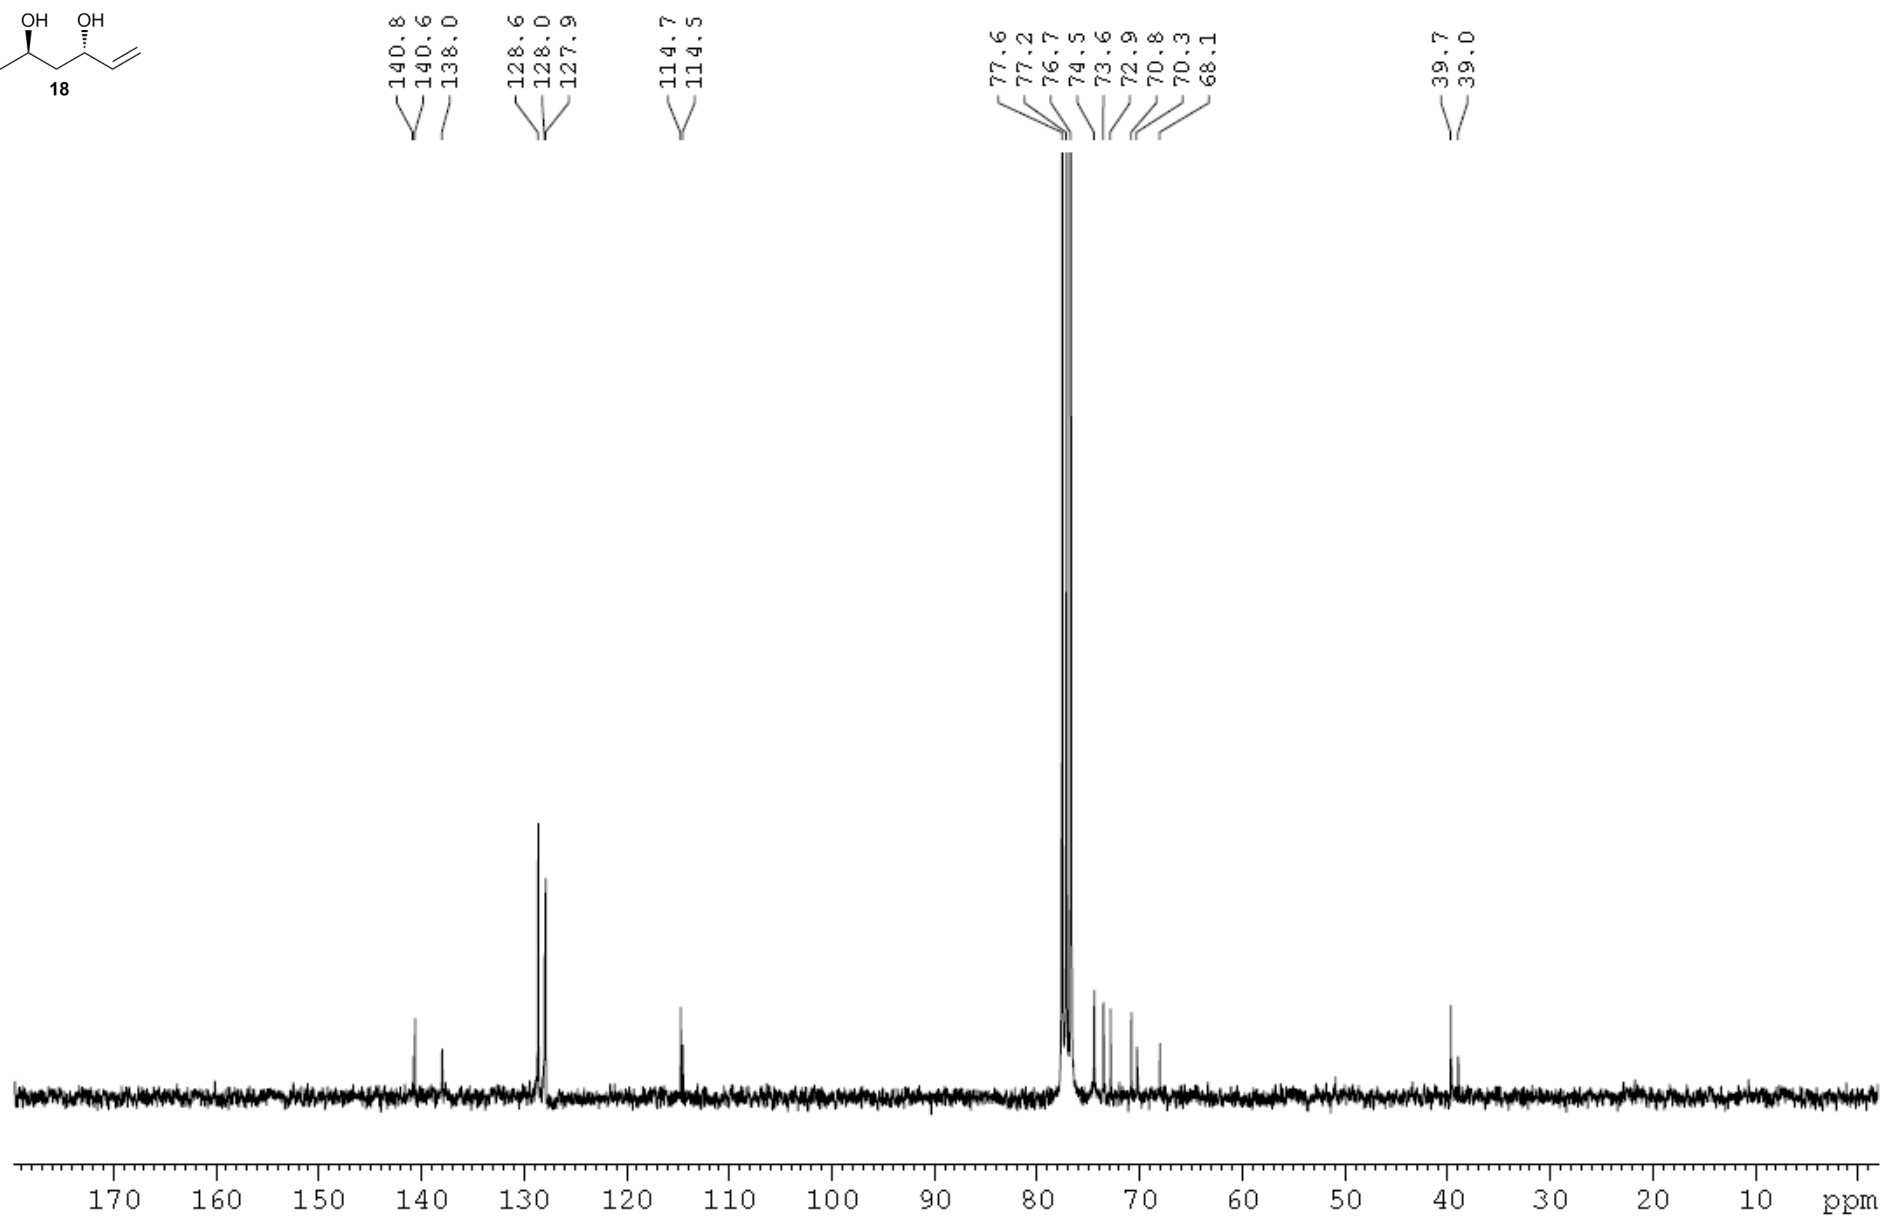

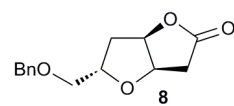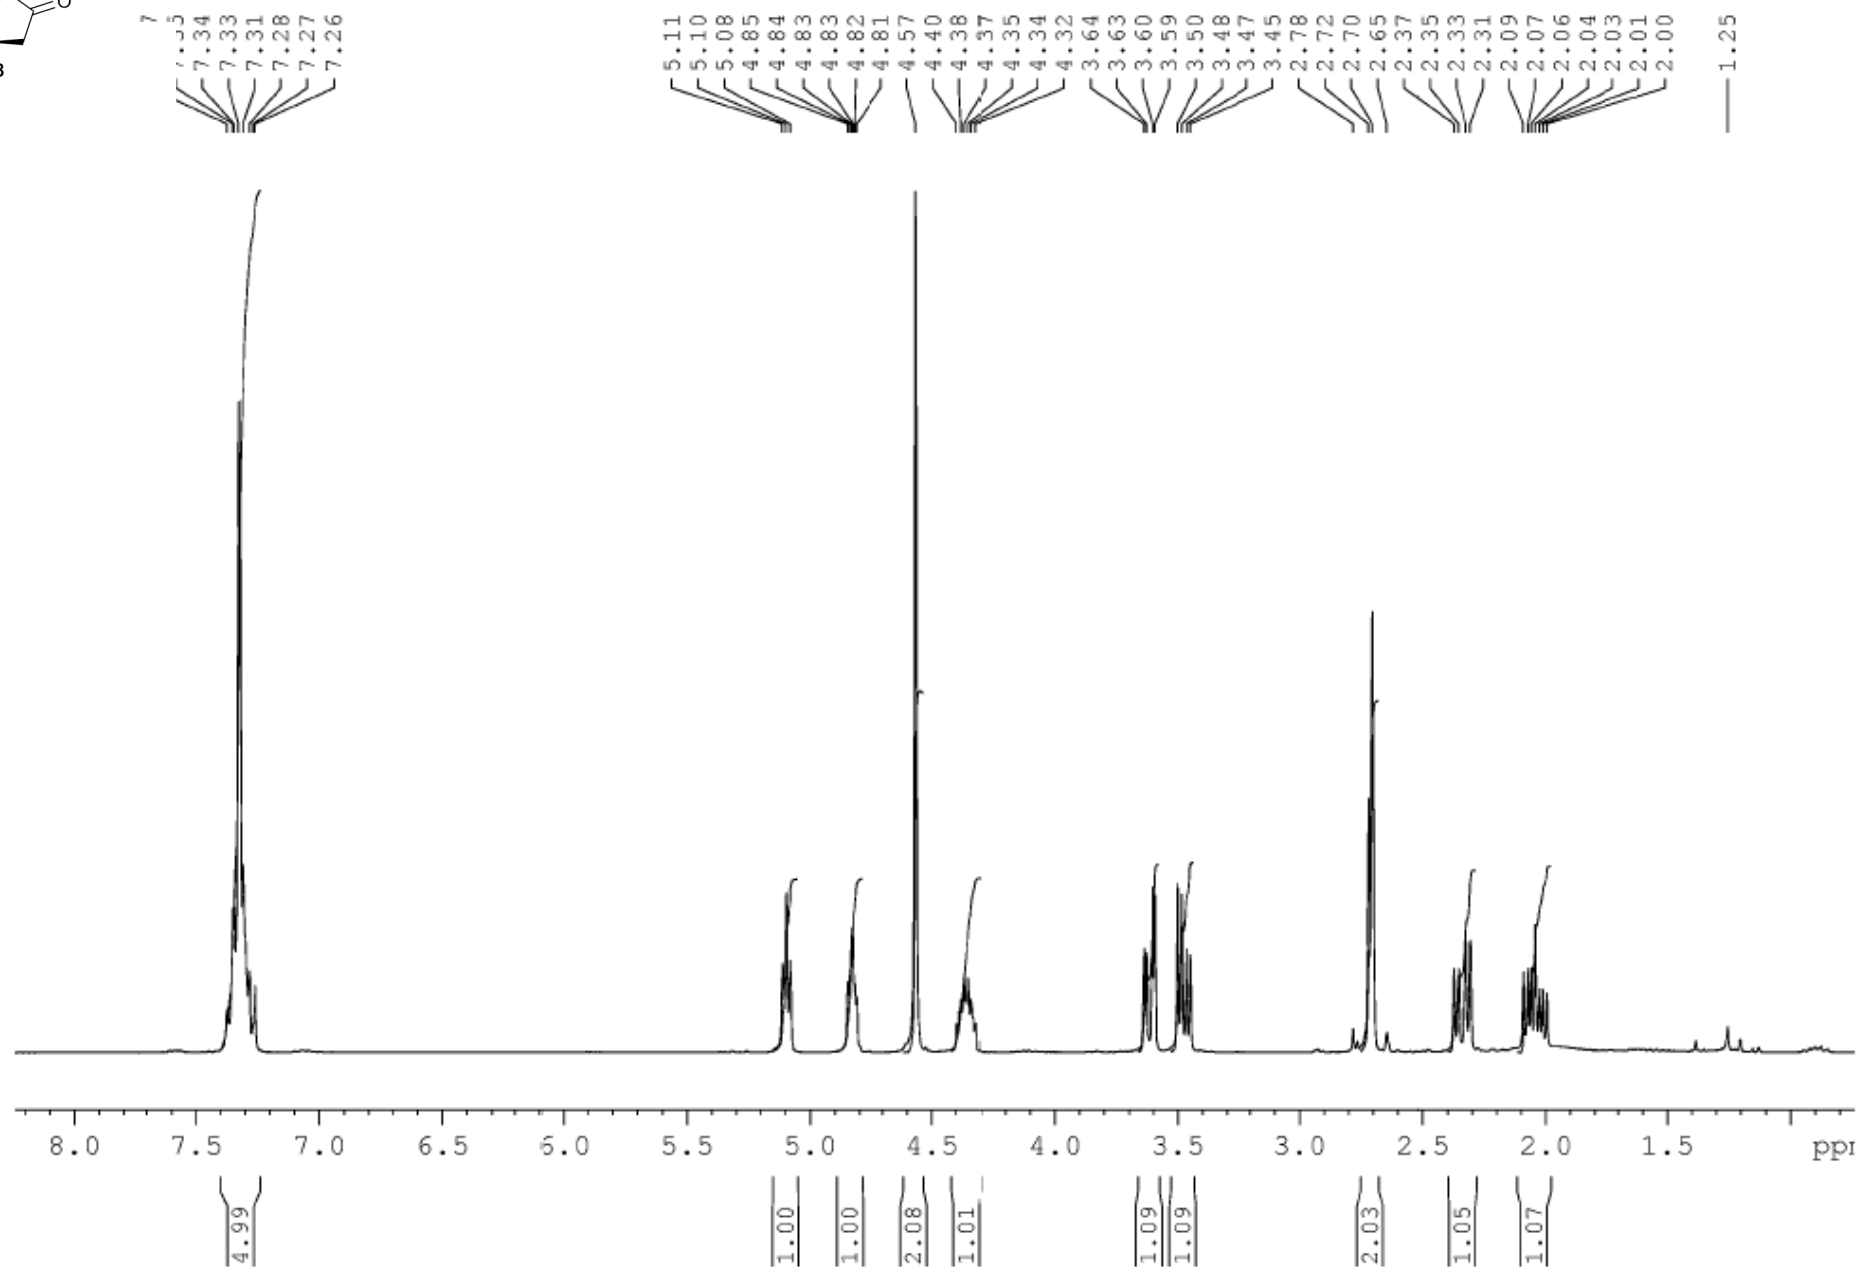



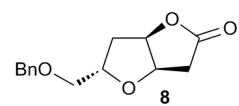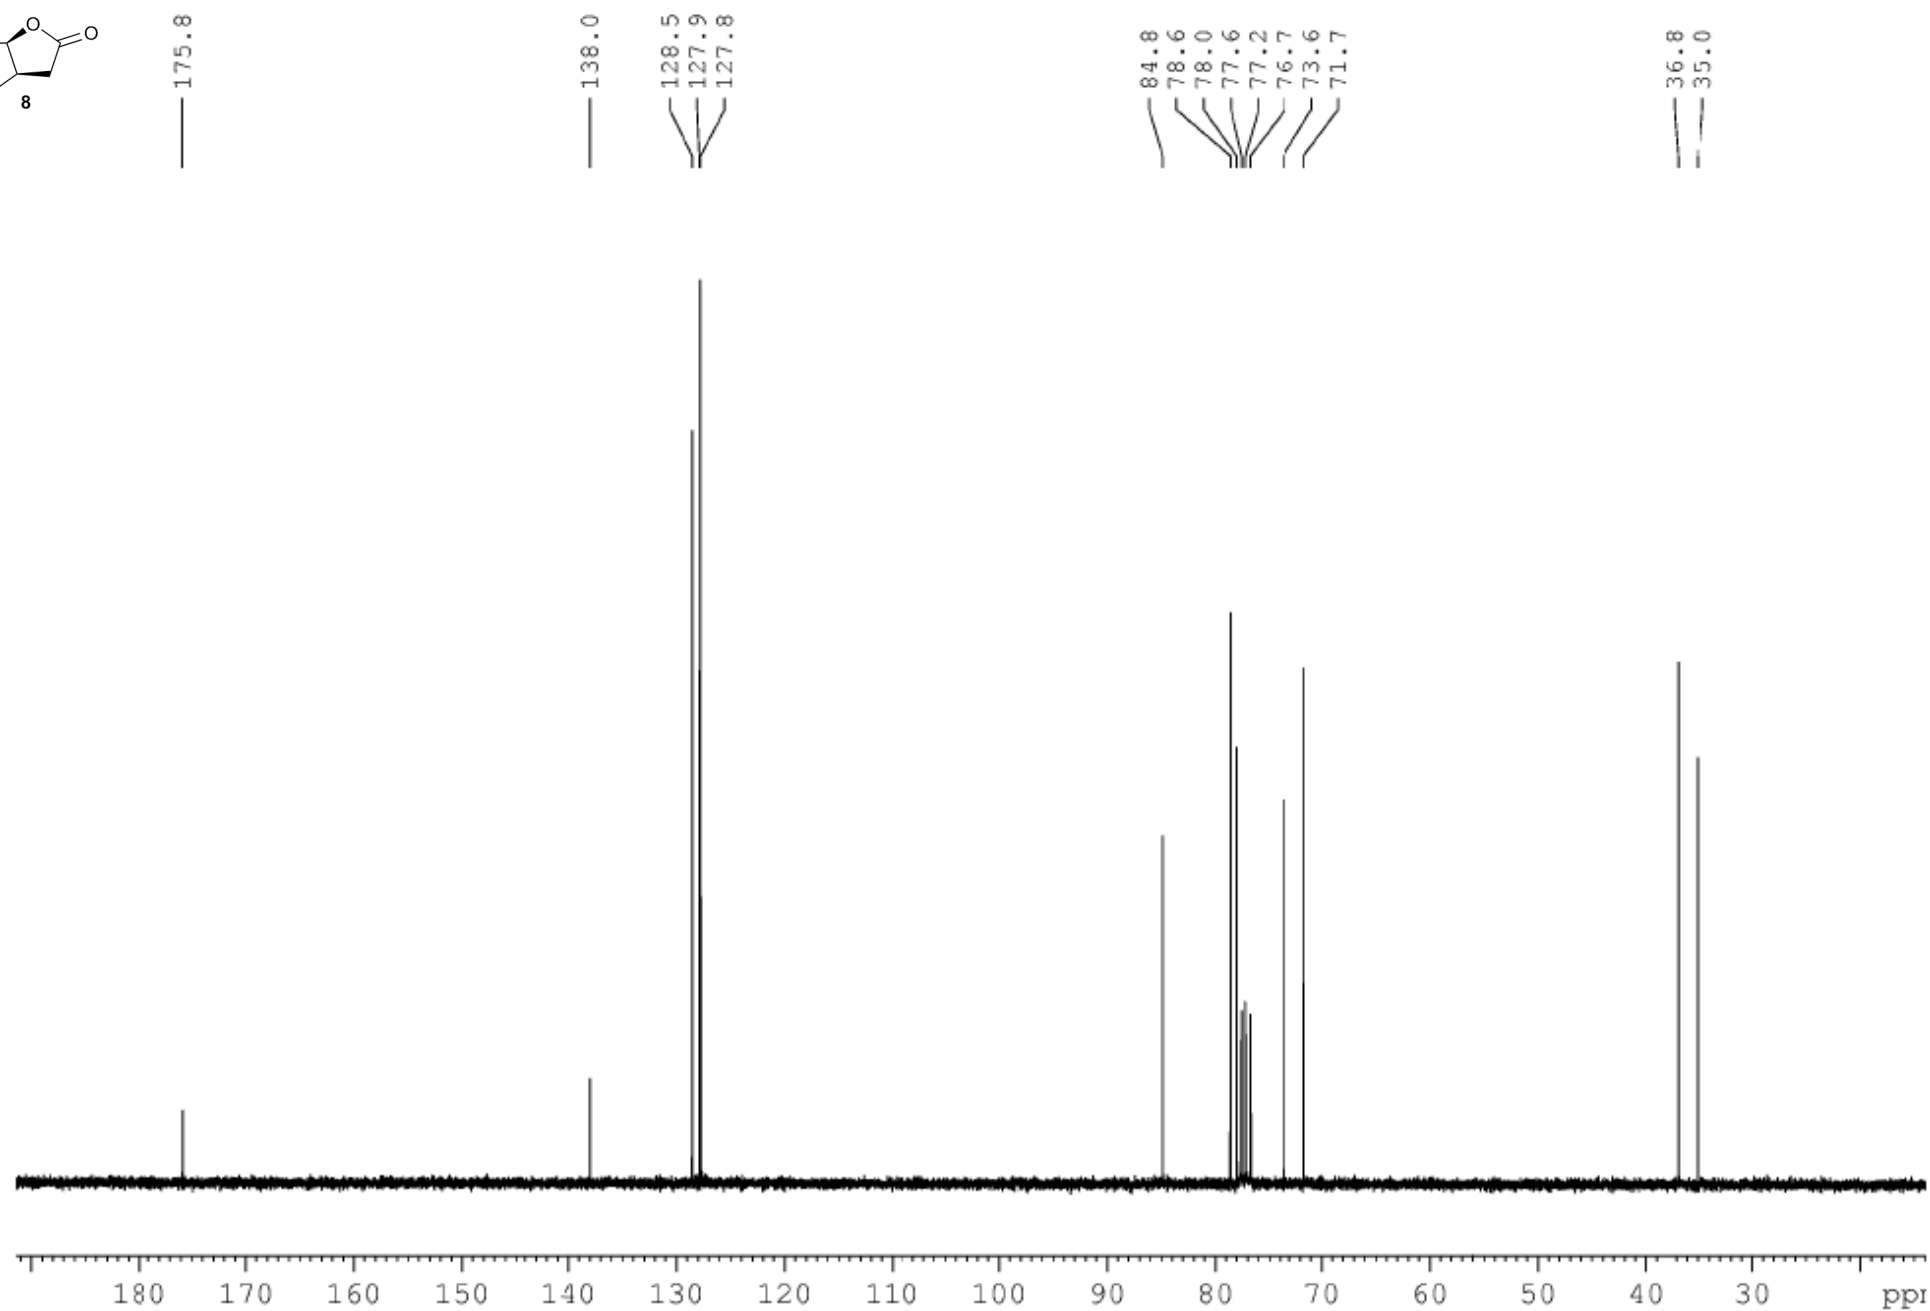

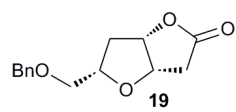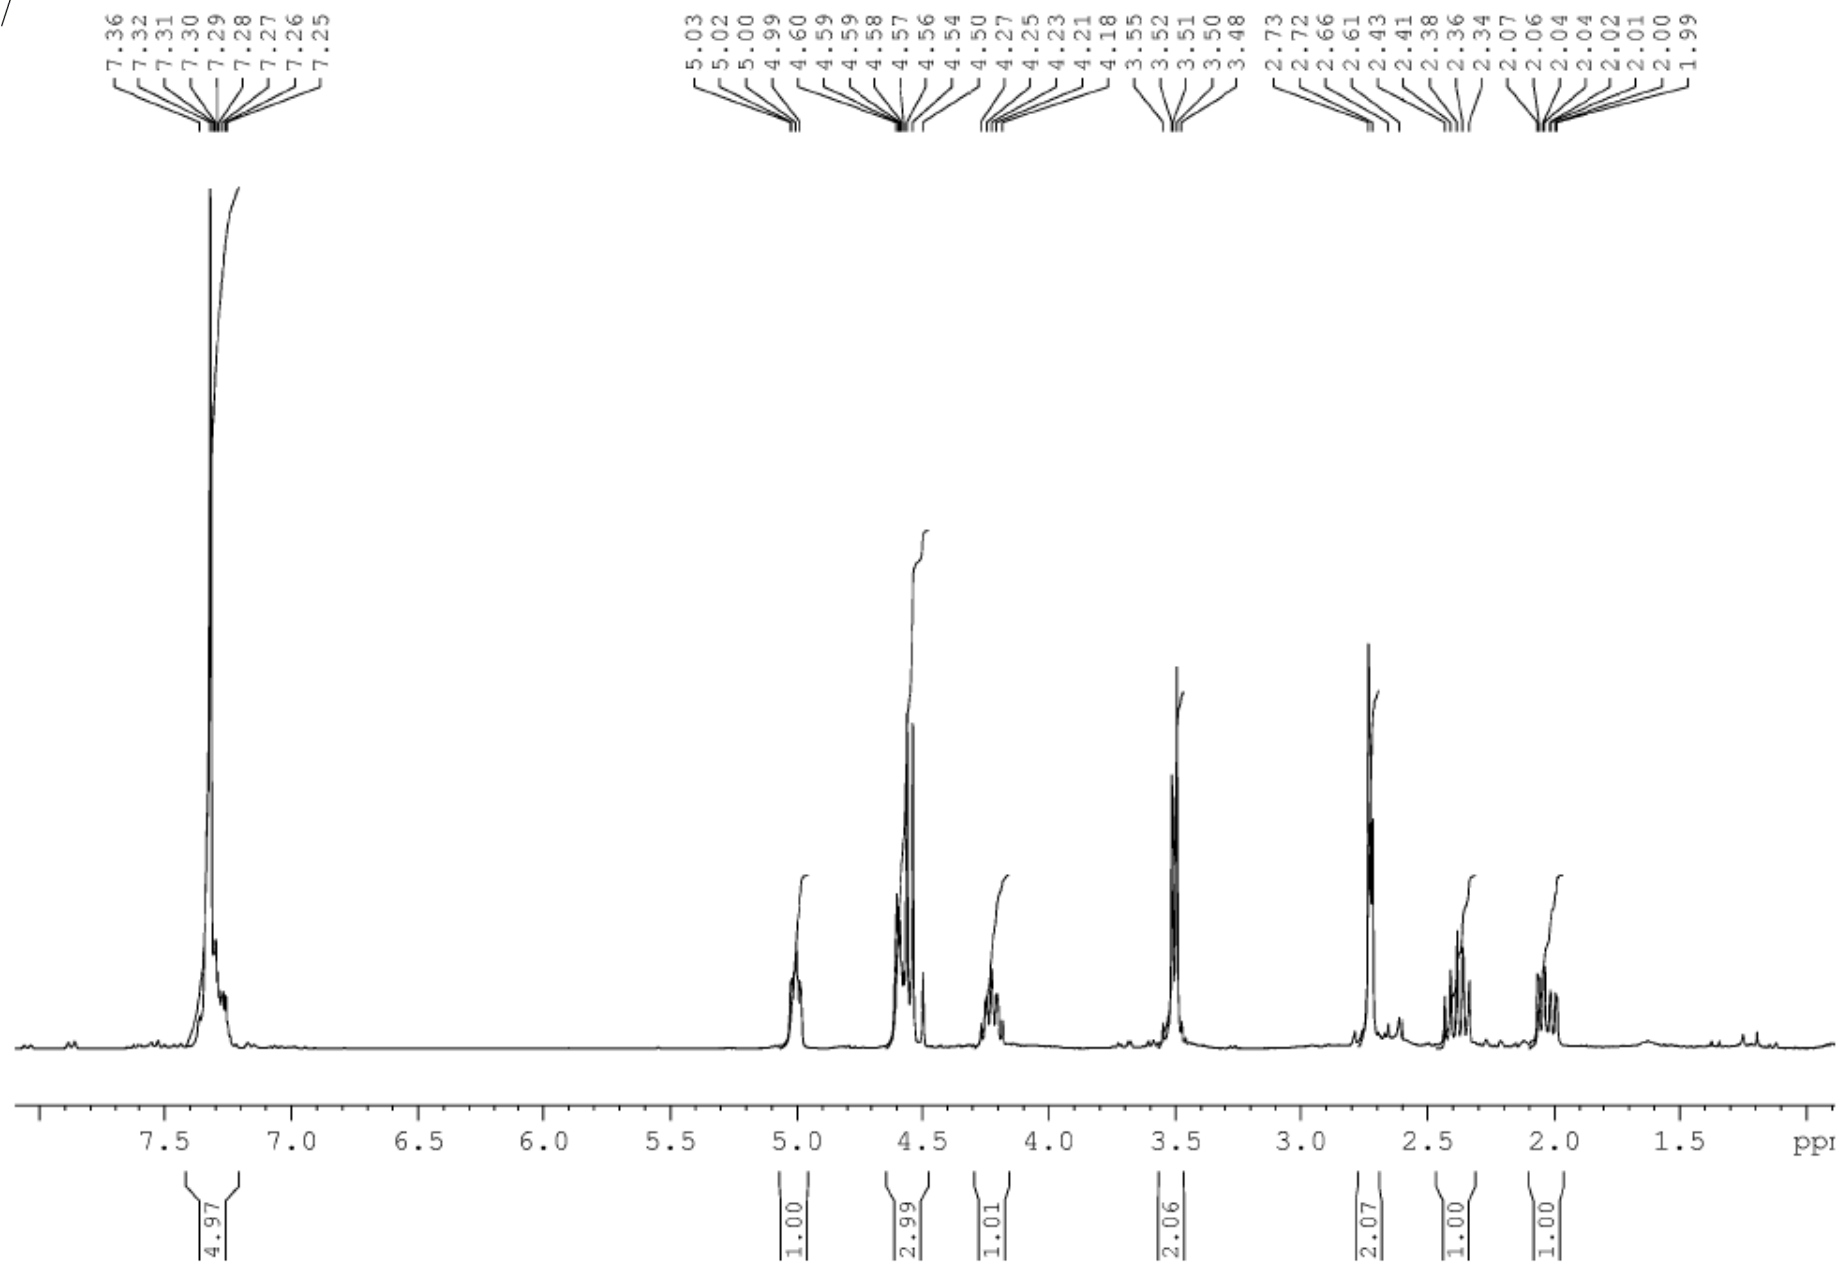

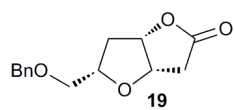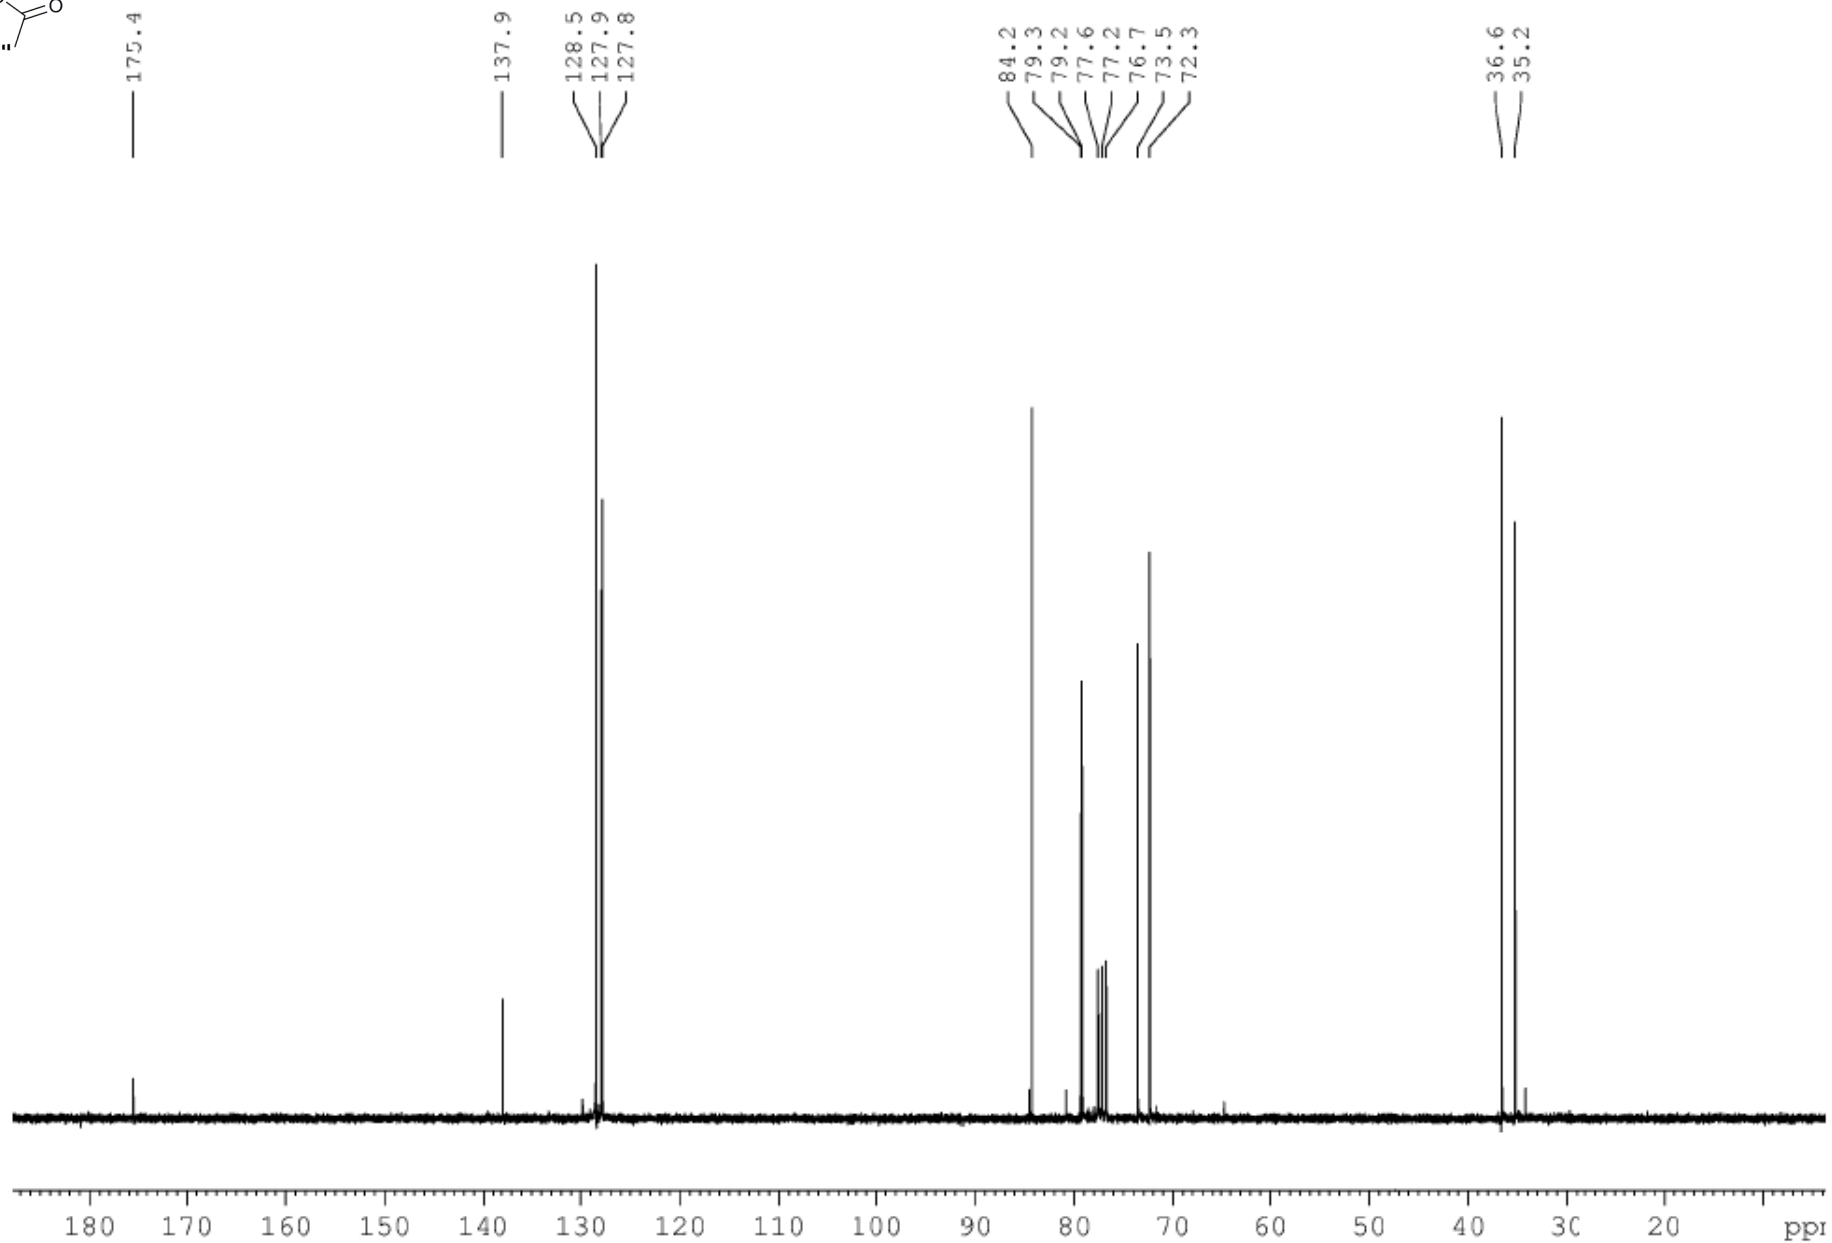

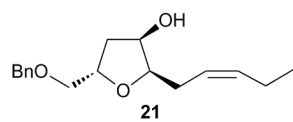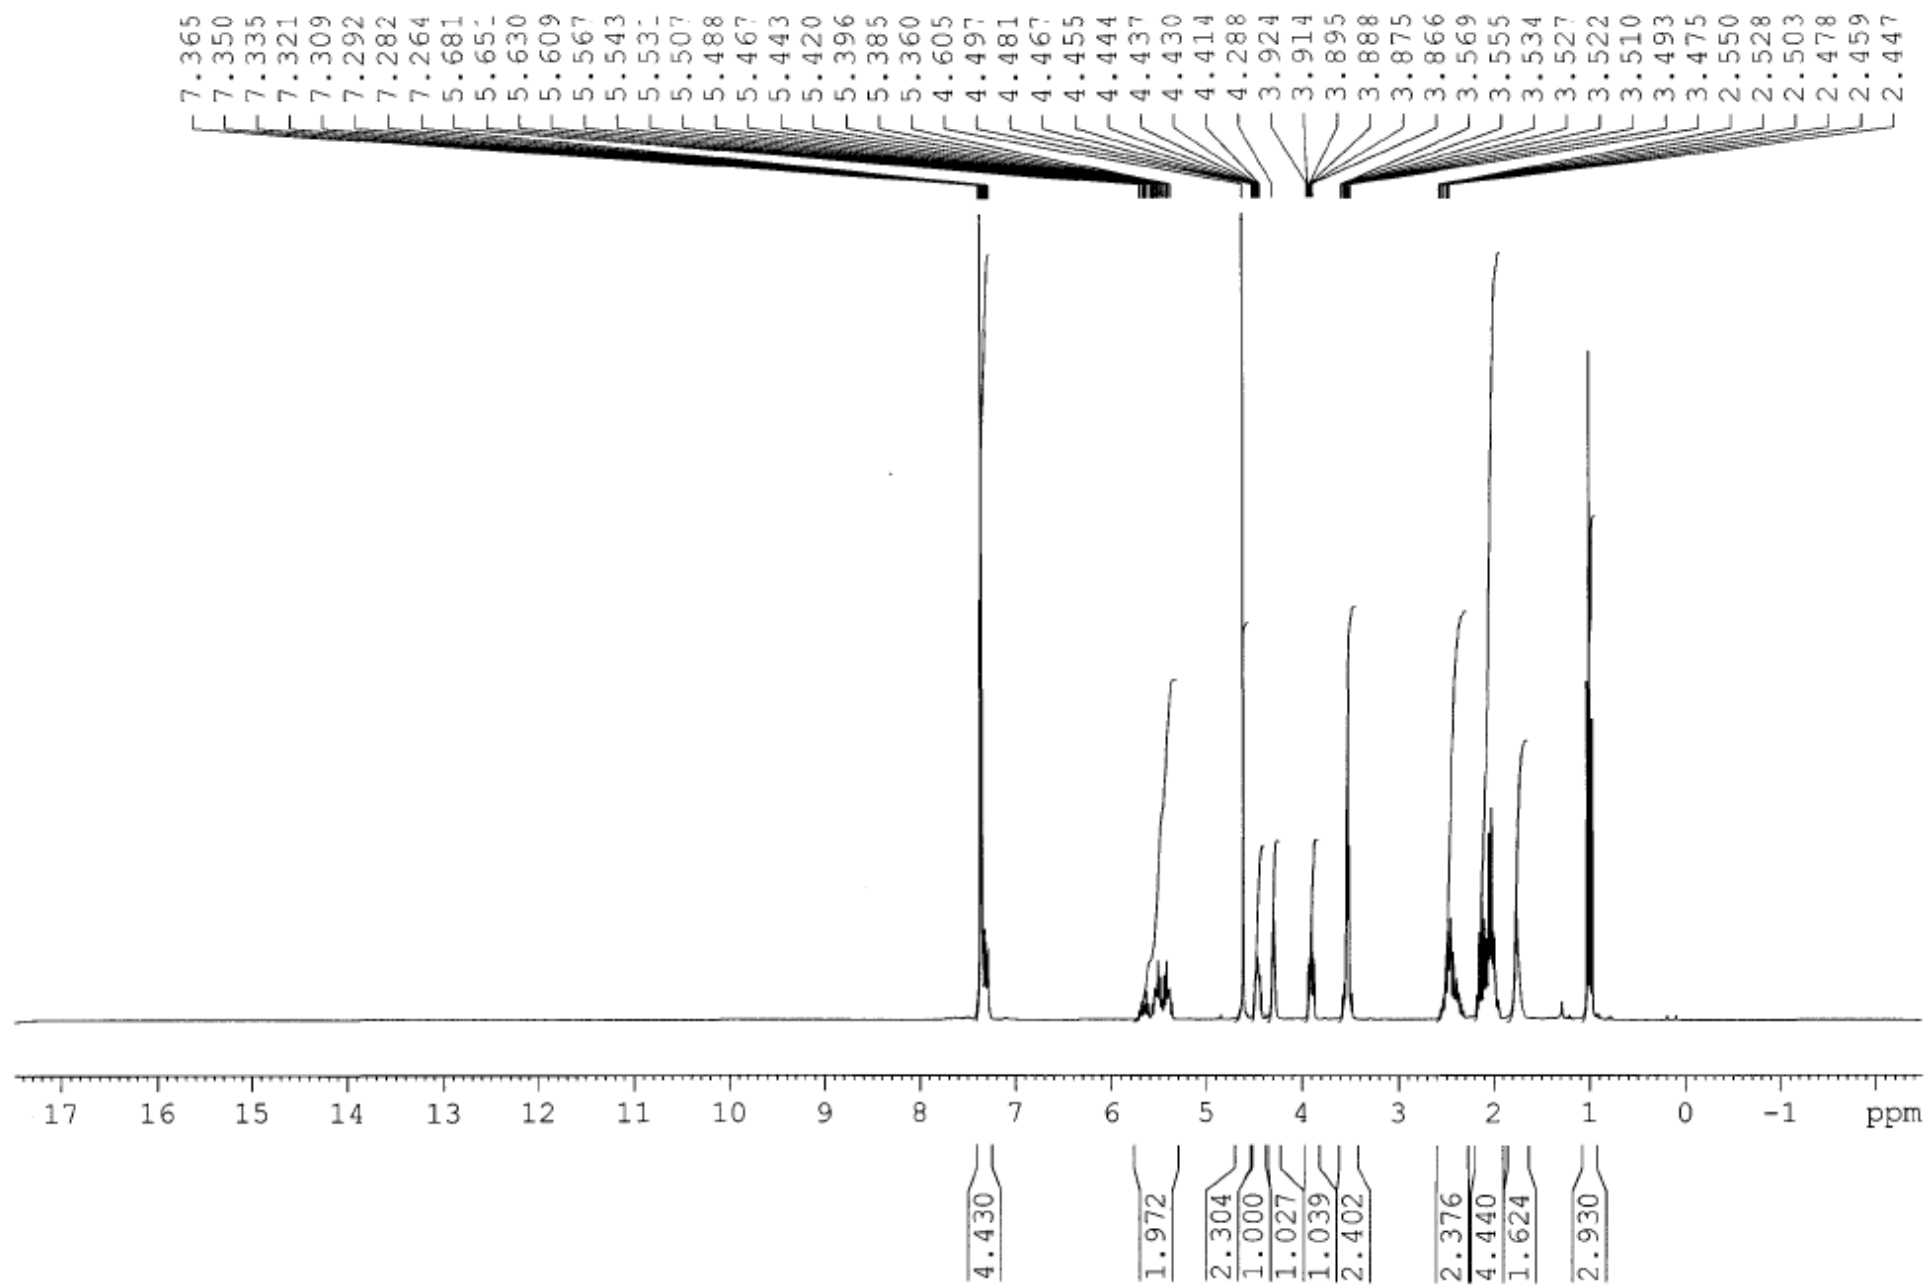

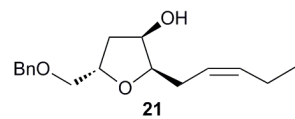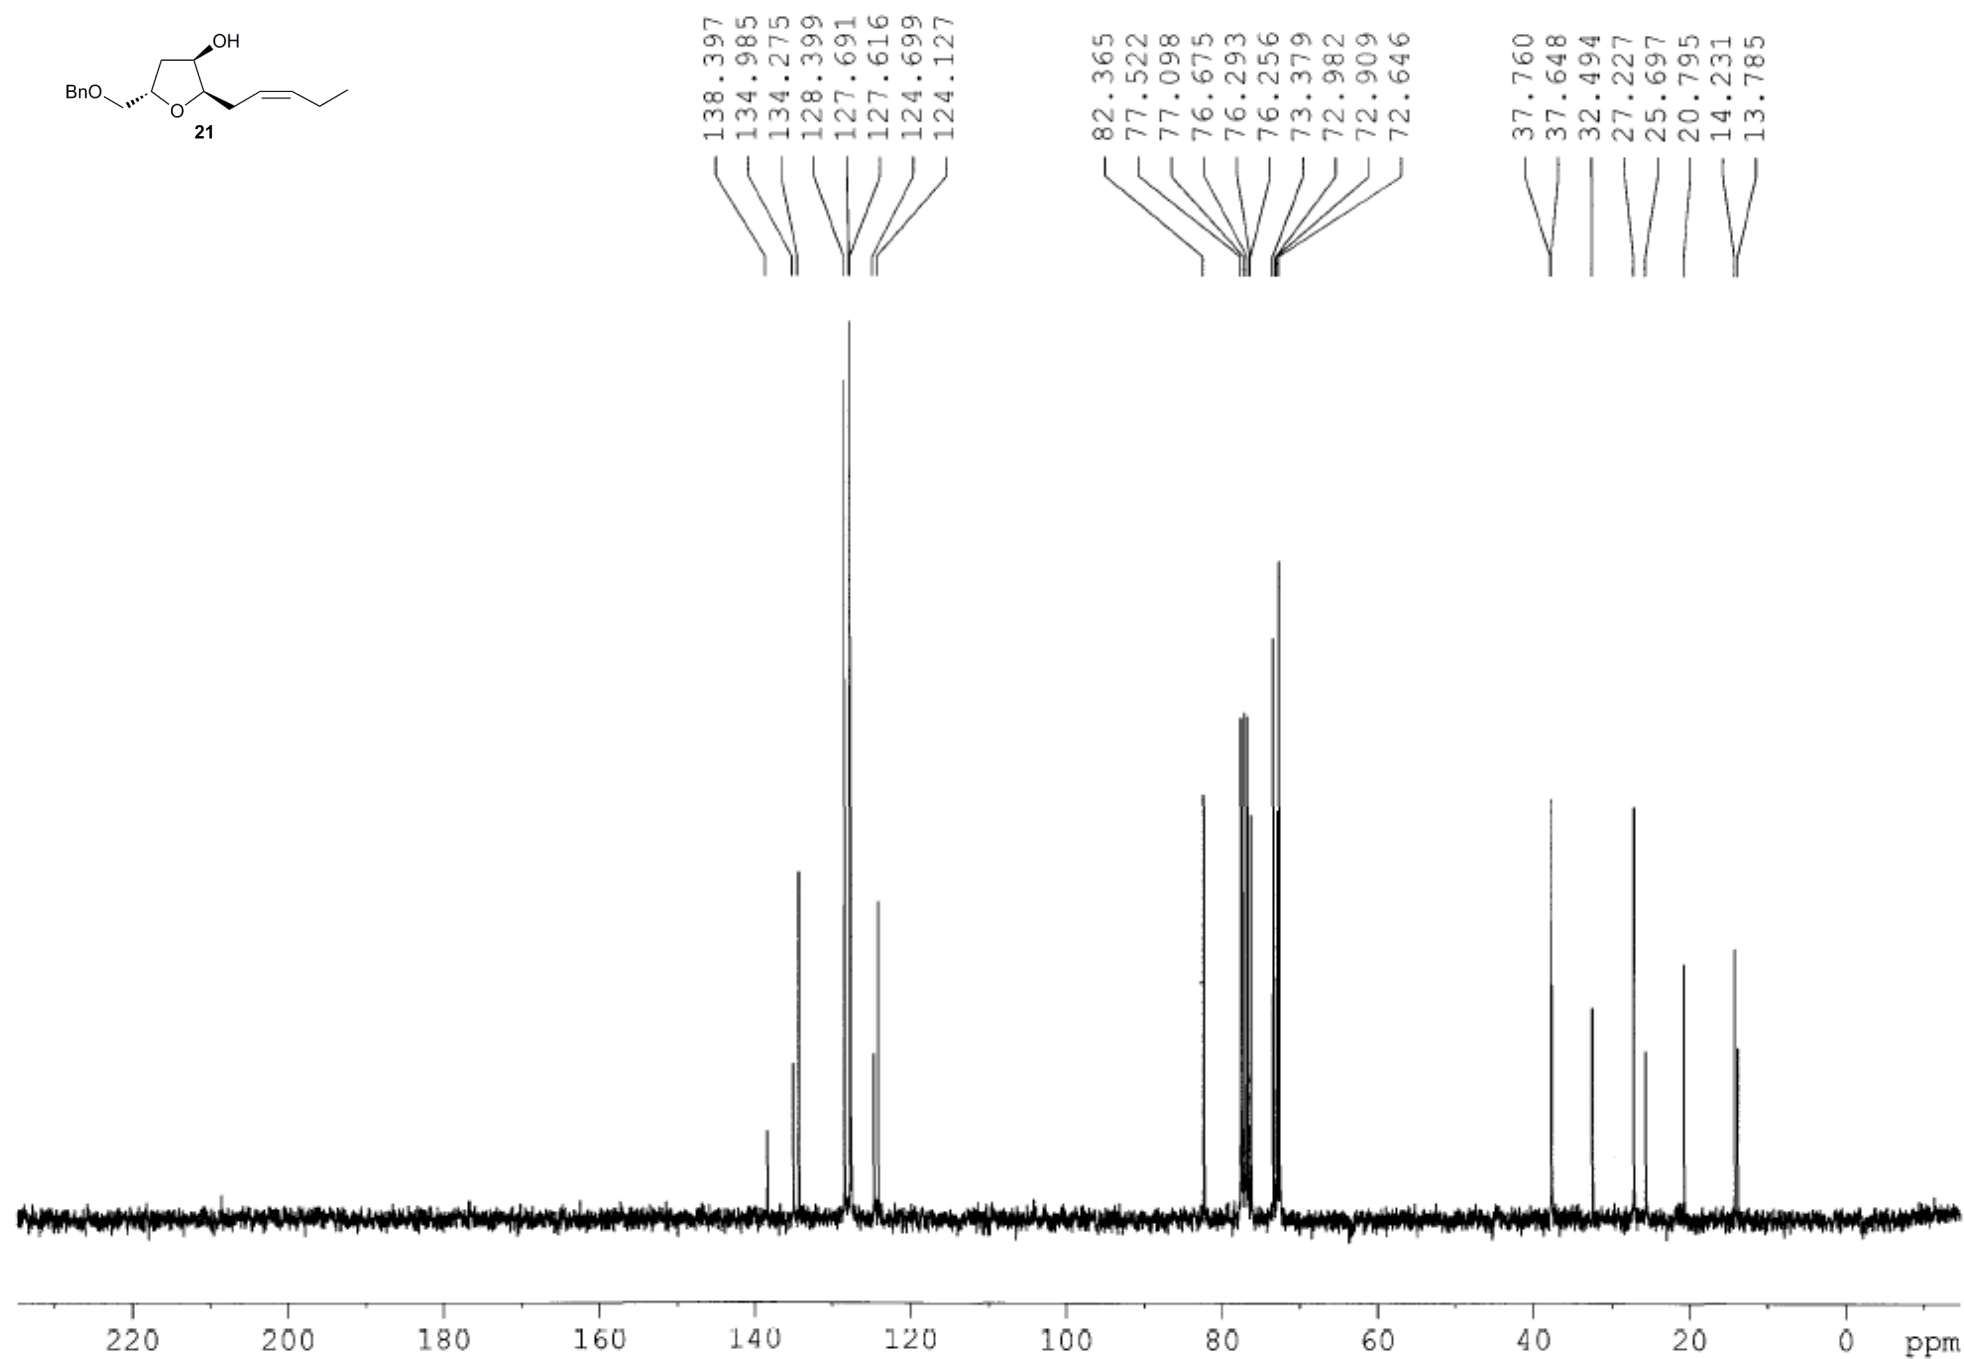

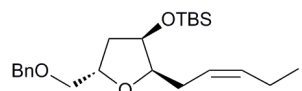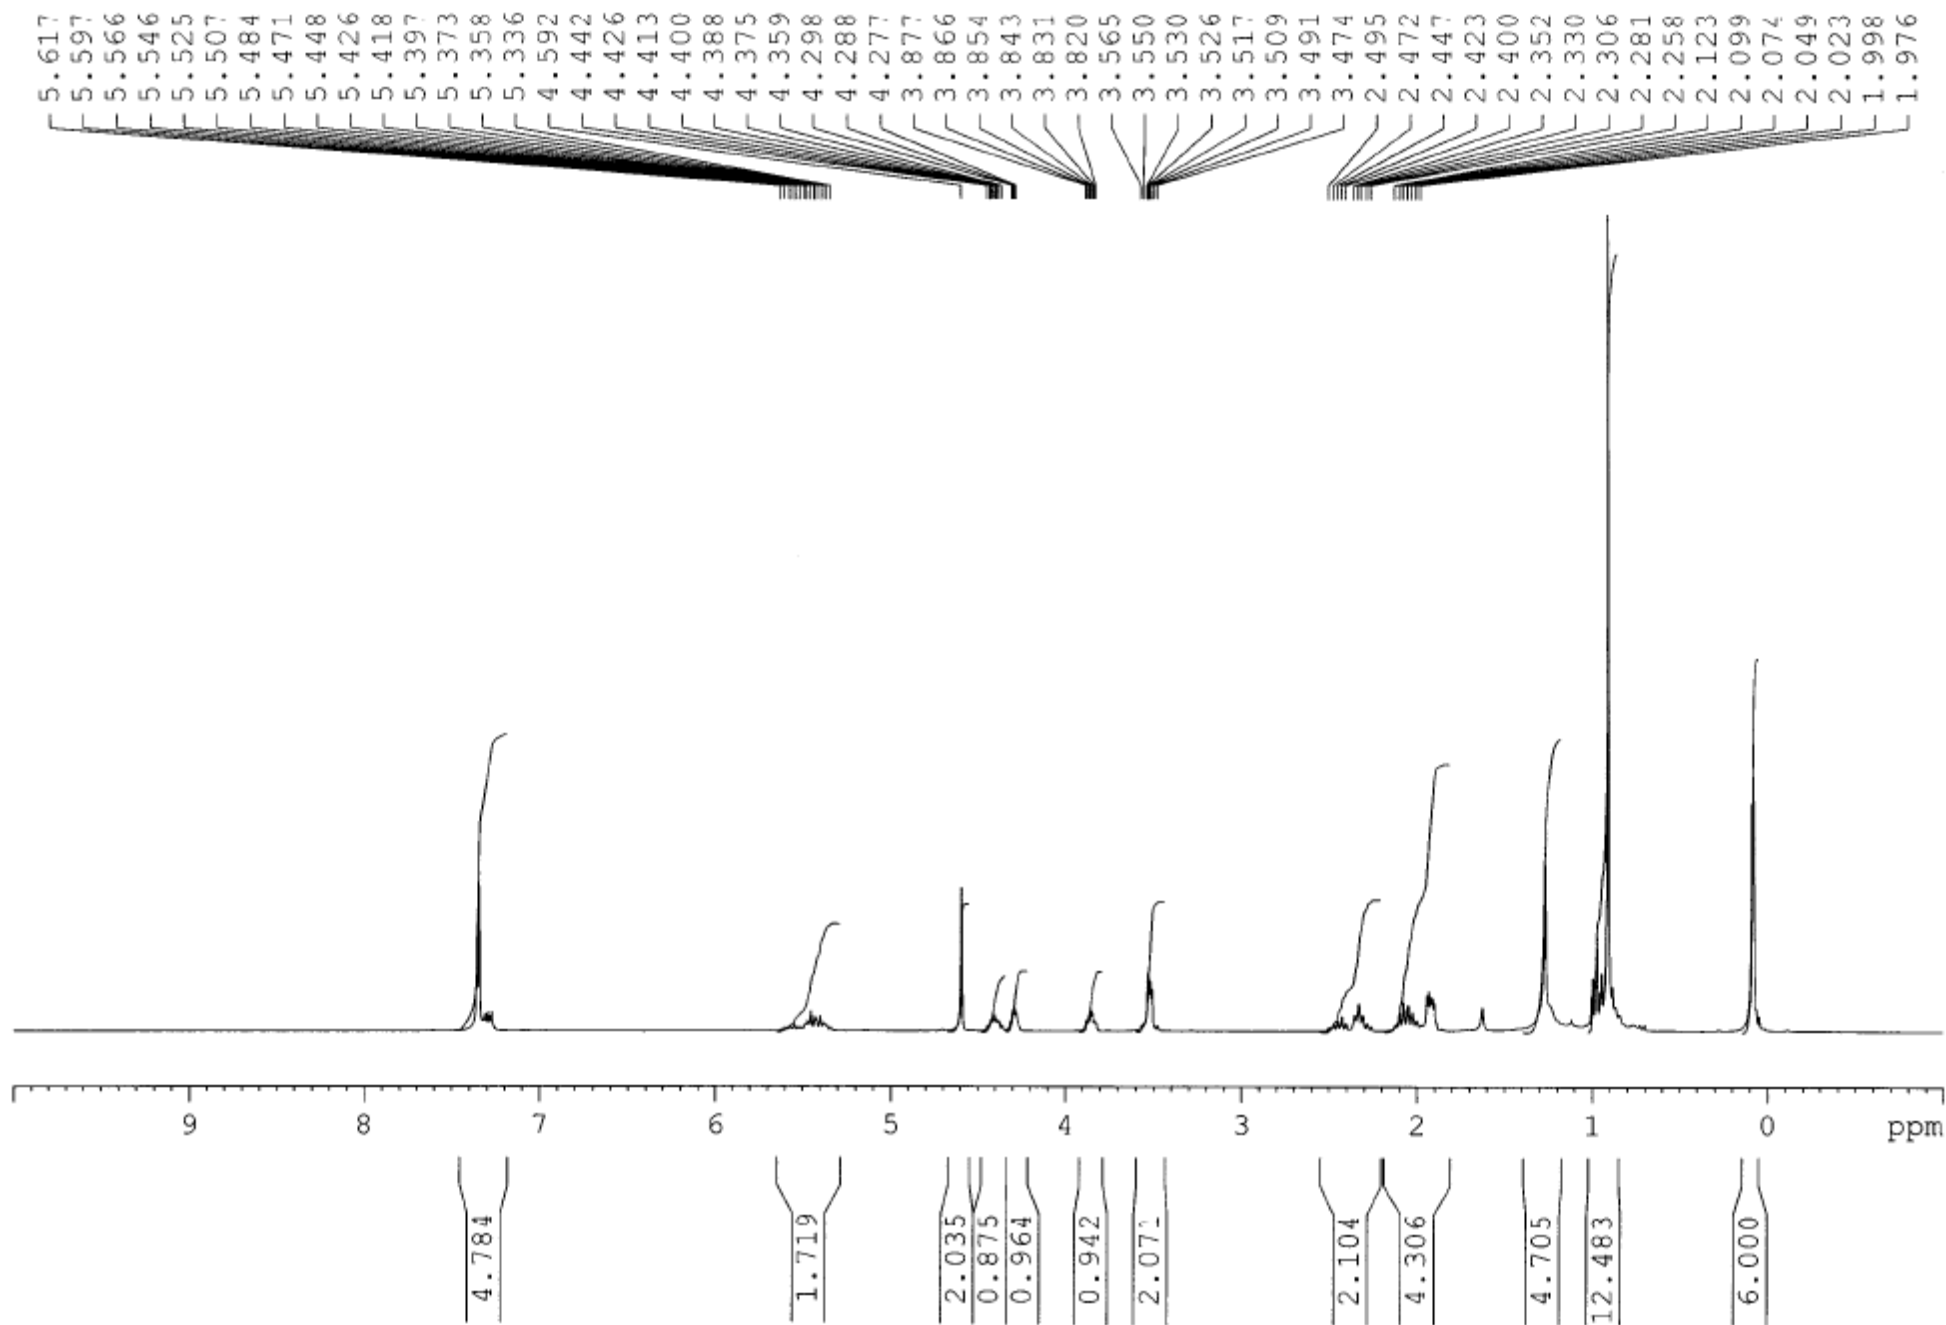

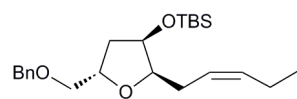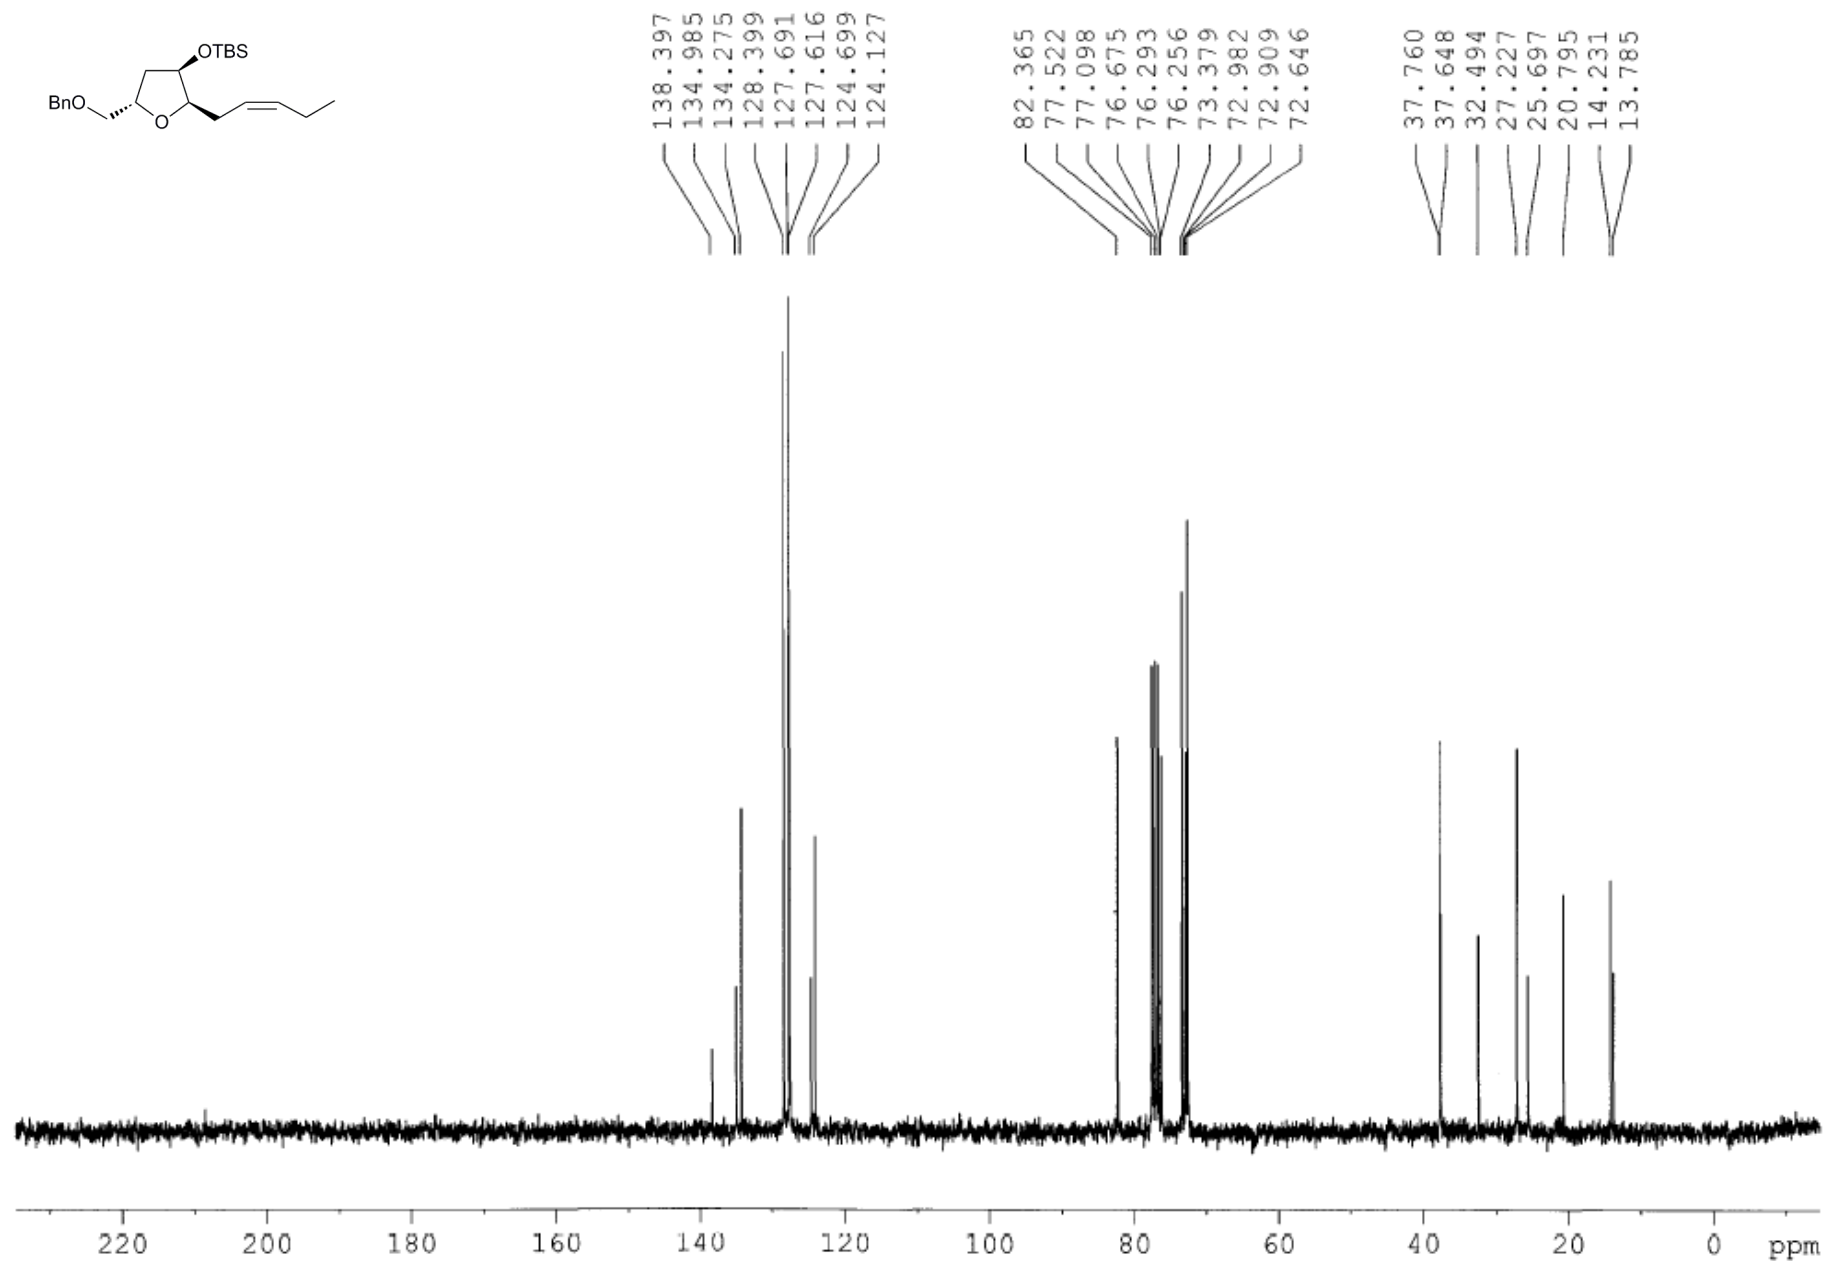

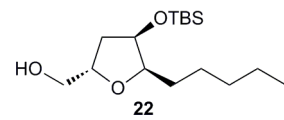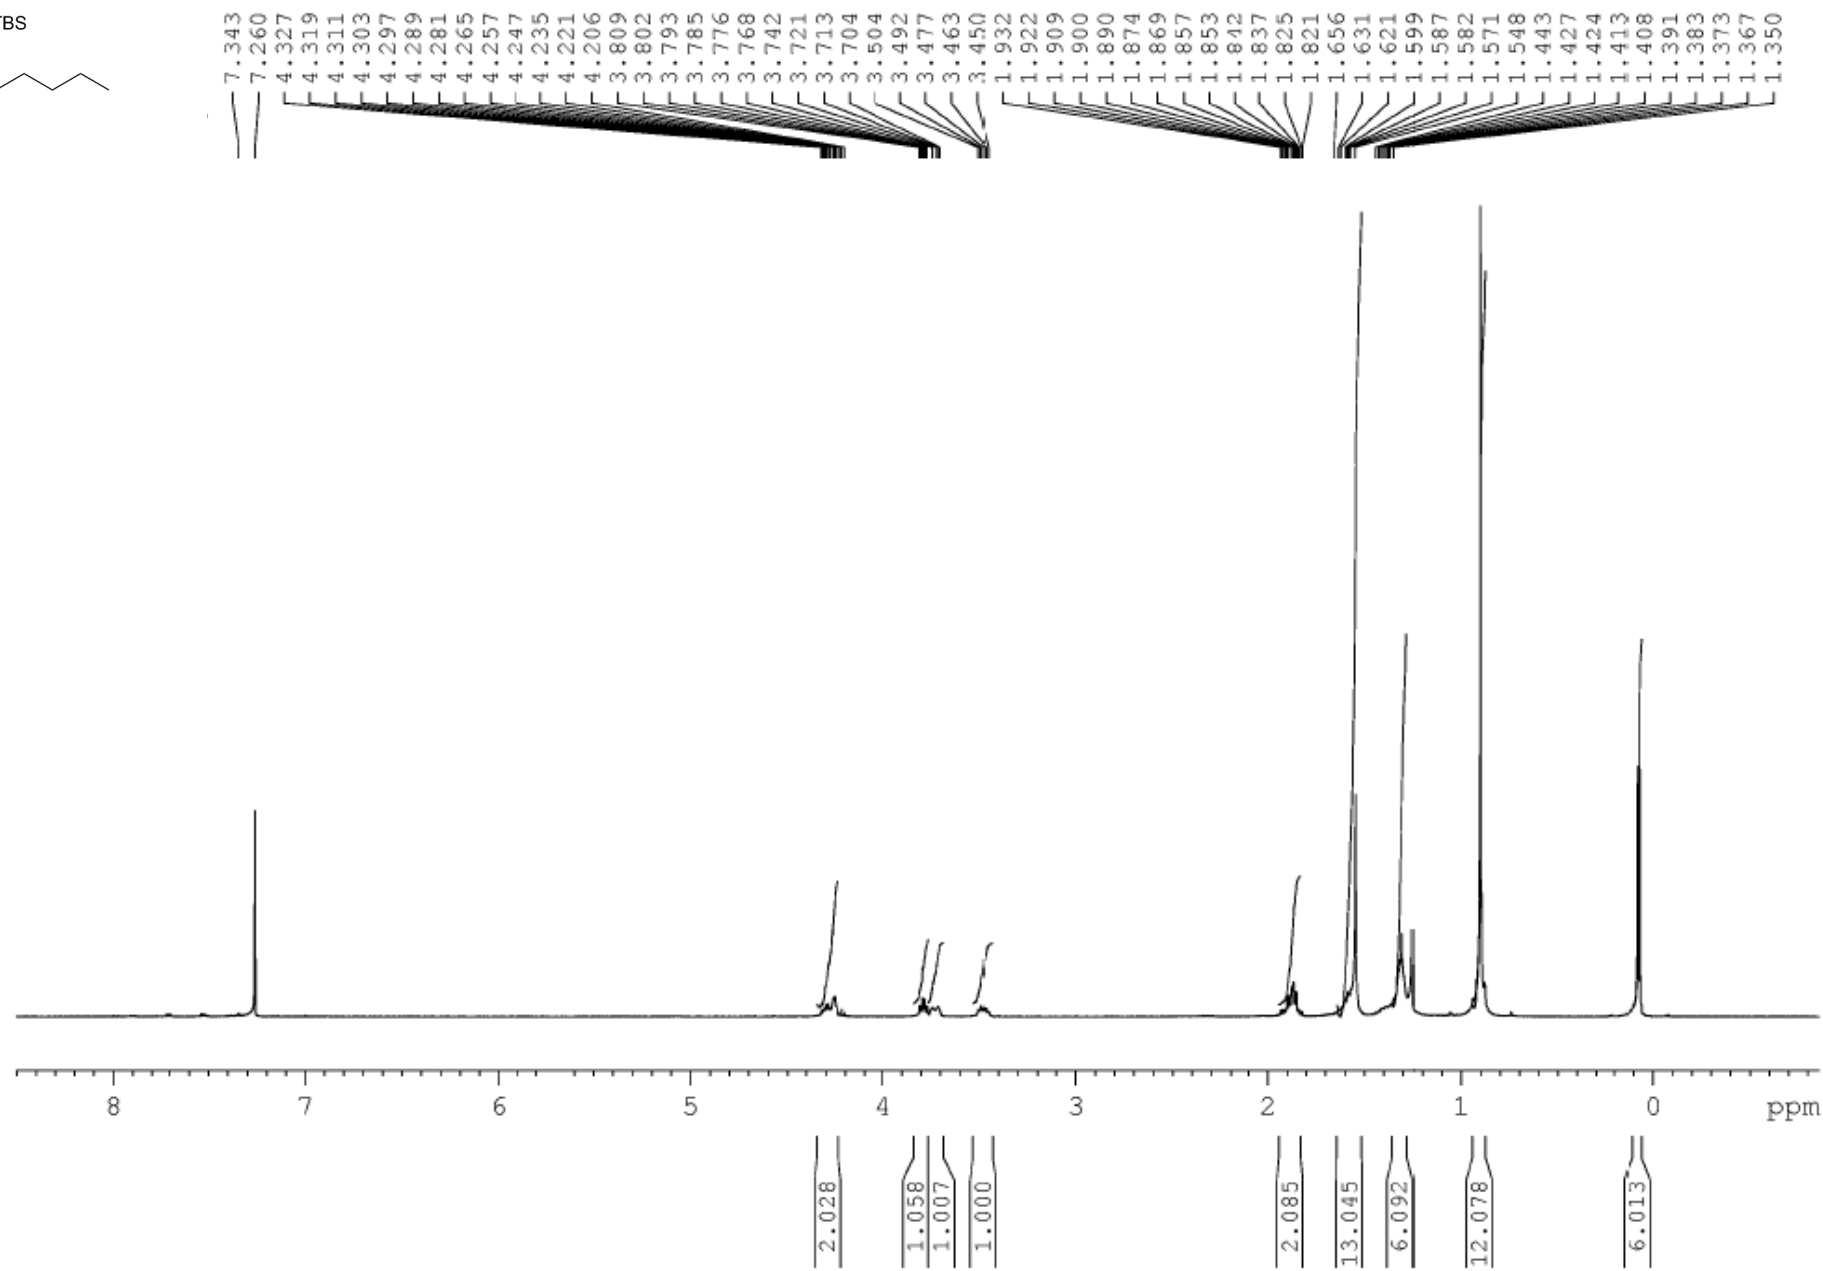



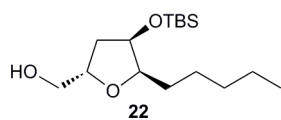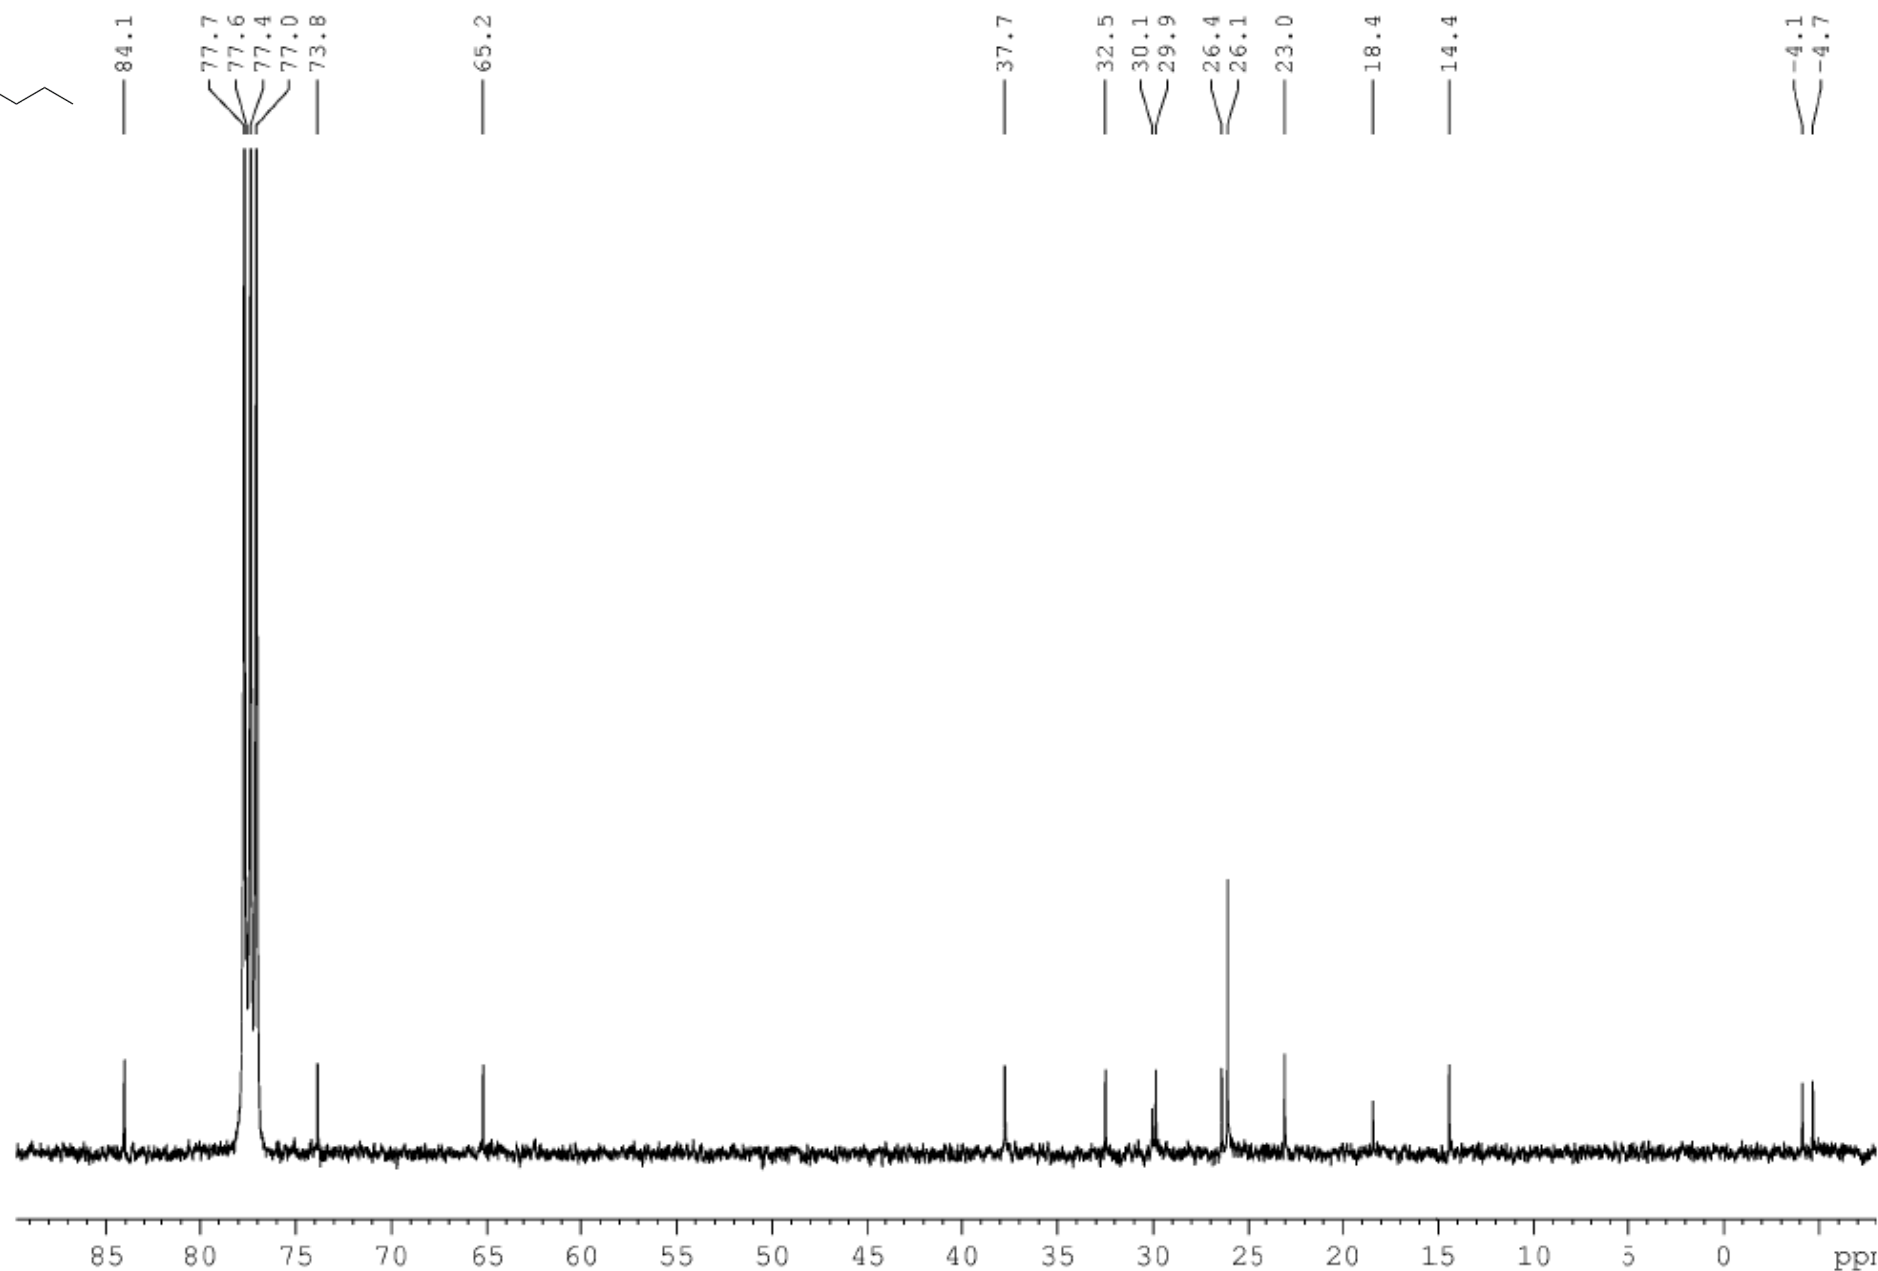

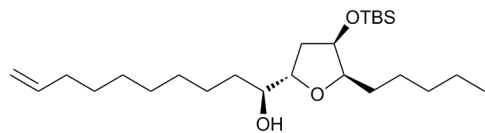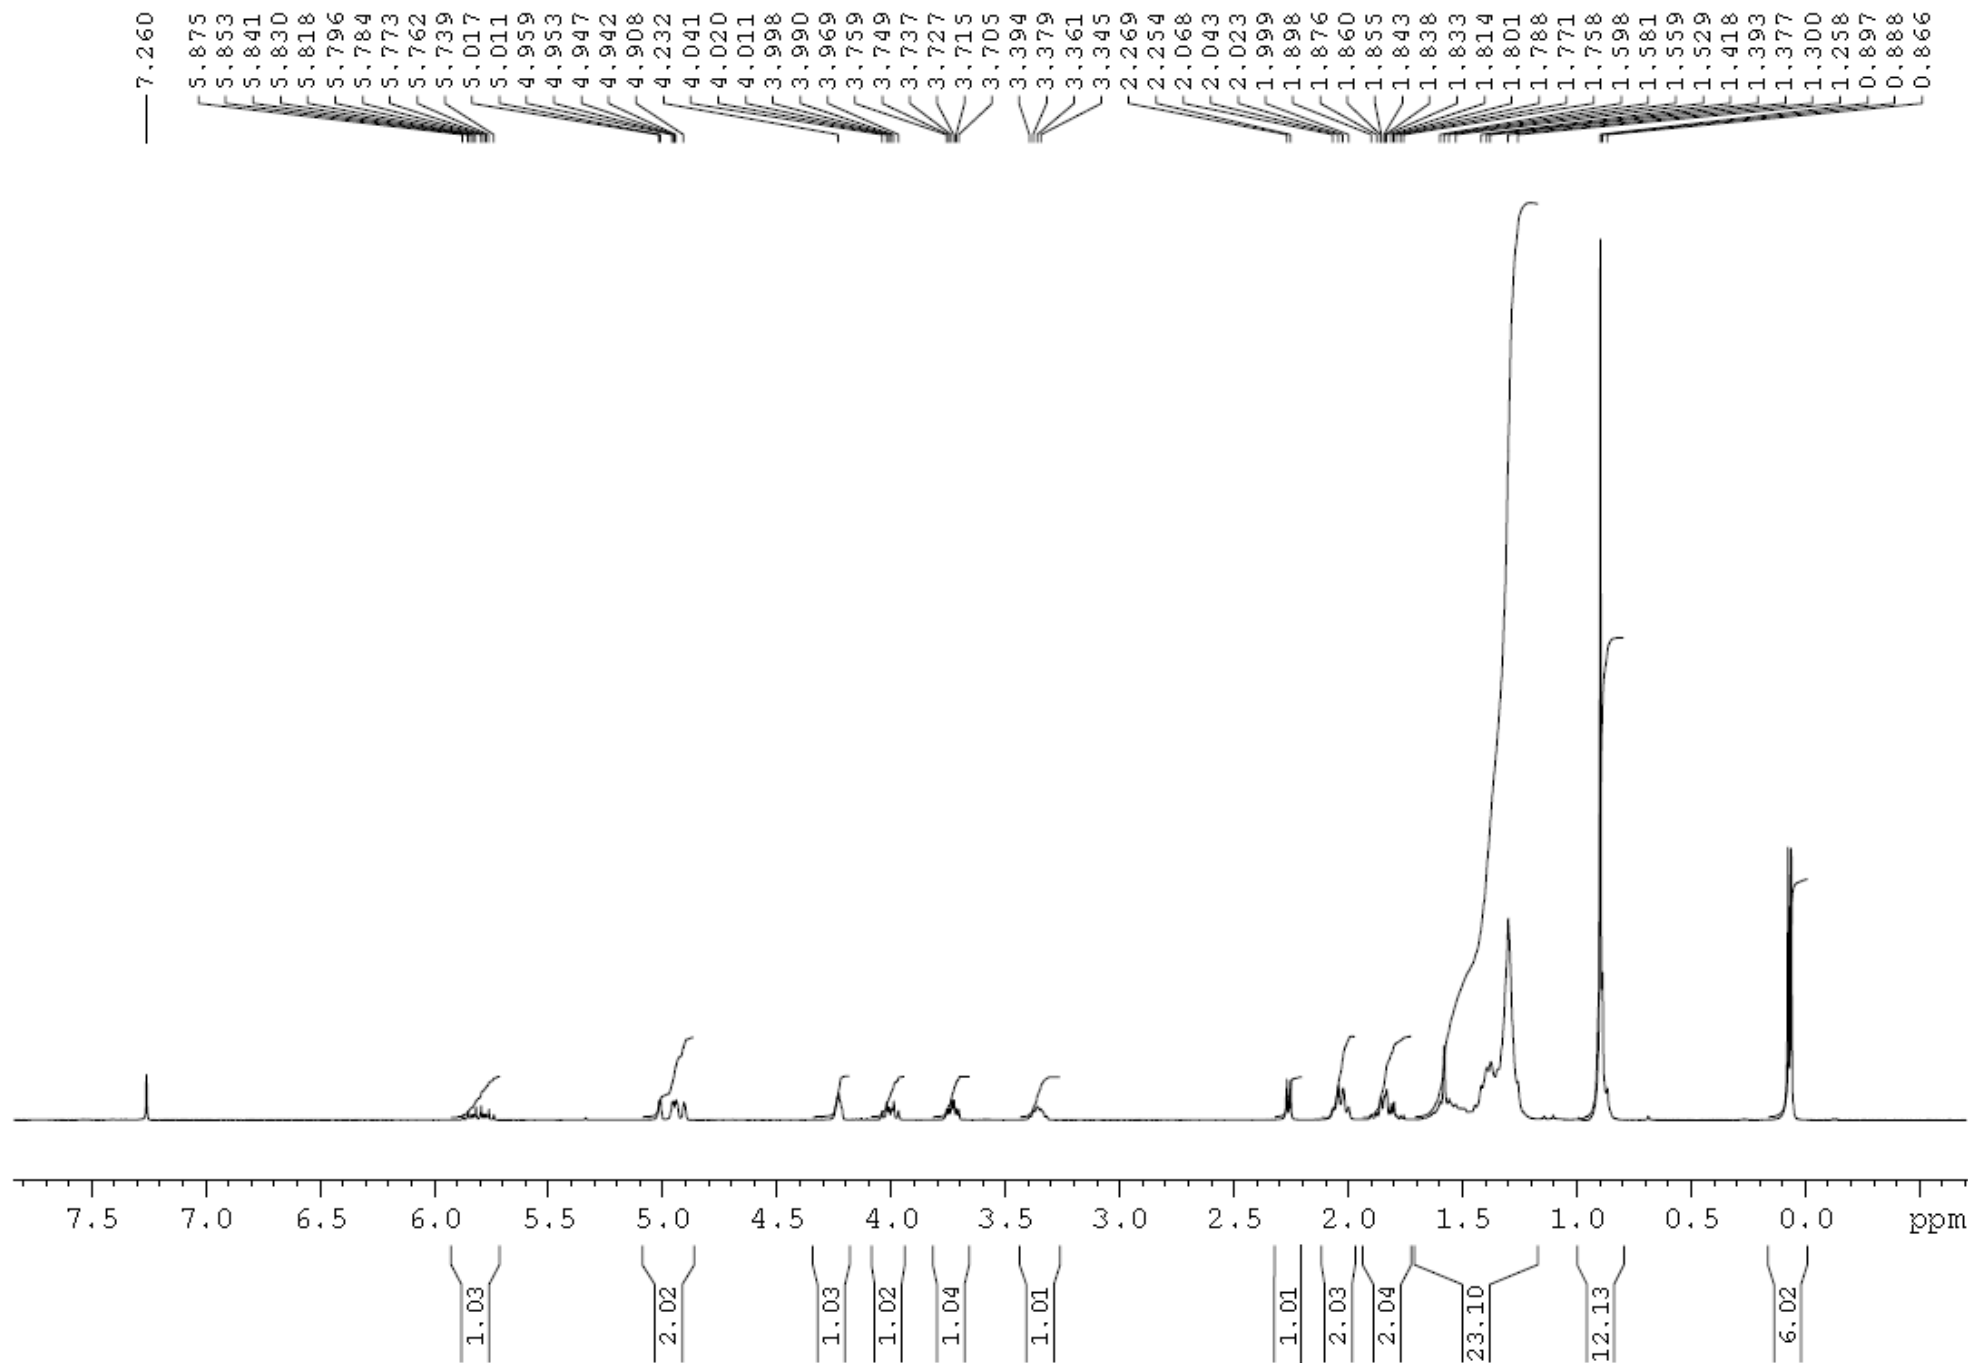

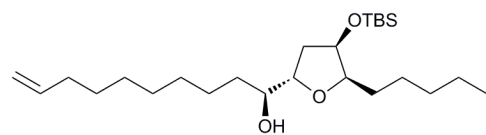

—139.37

—114.25

—83.55

—80.44

—77.58

—76.73

—74.36

—73.77

38.62

33.94

33.76

32.26

29.80

29.57

29.53

29.24

29.07

26.19

25.92

25.82

22.82

18.22

14.23

—4.31

—4.86

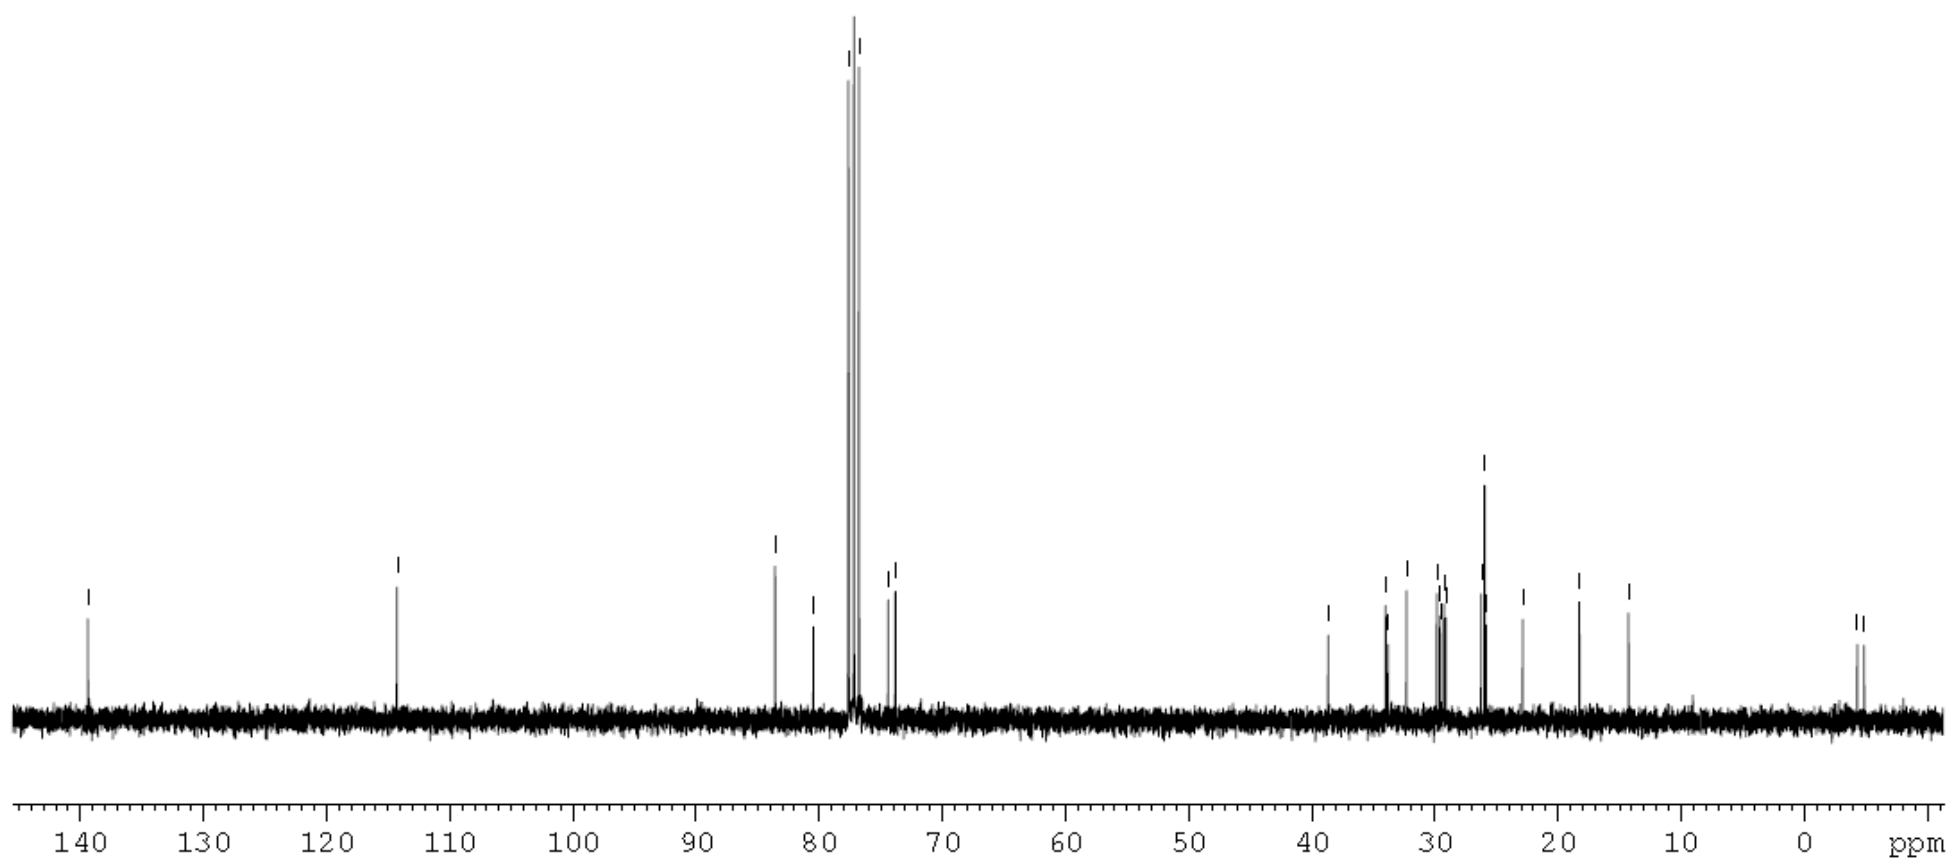

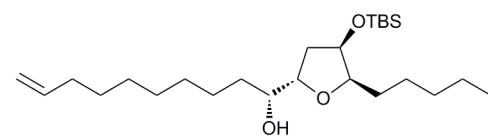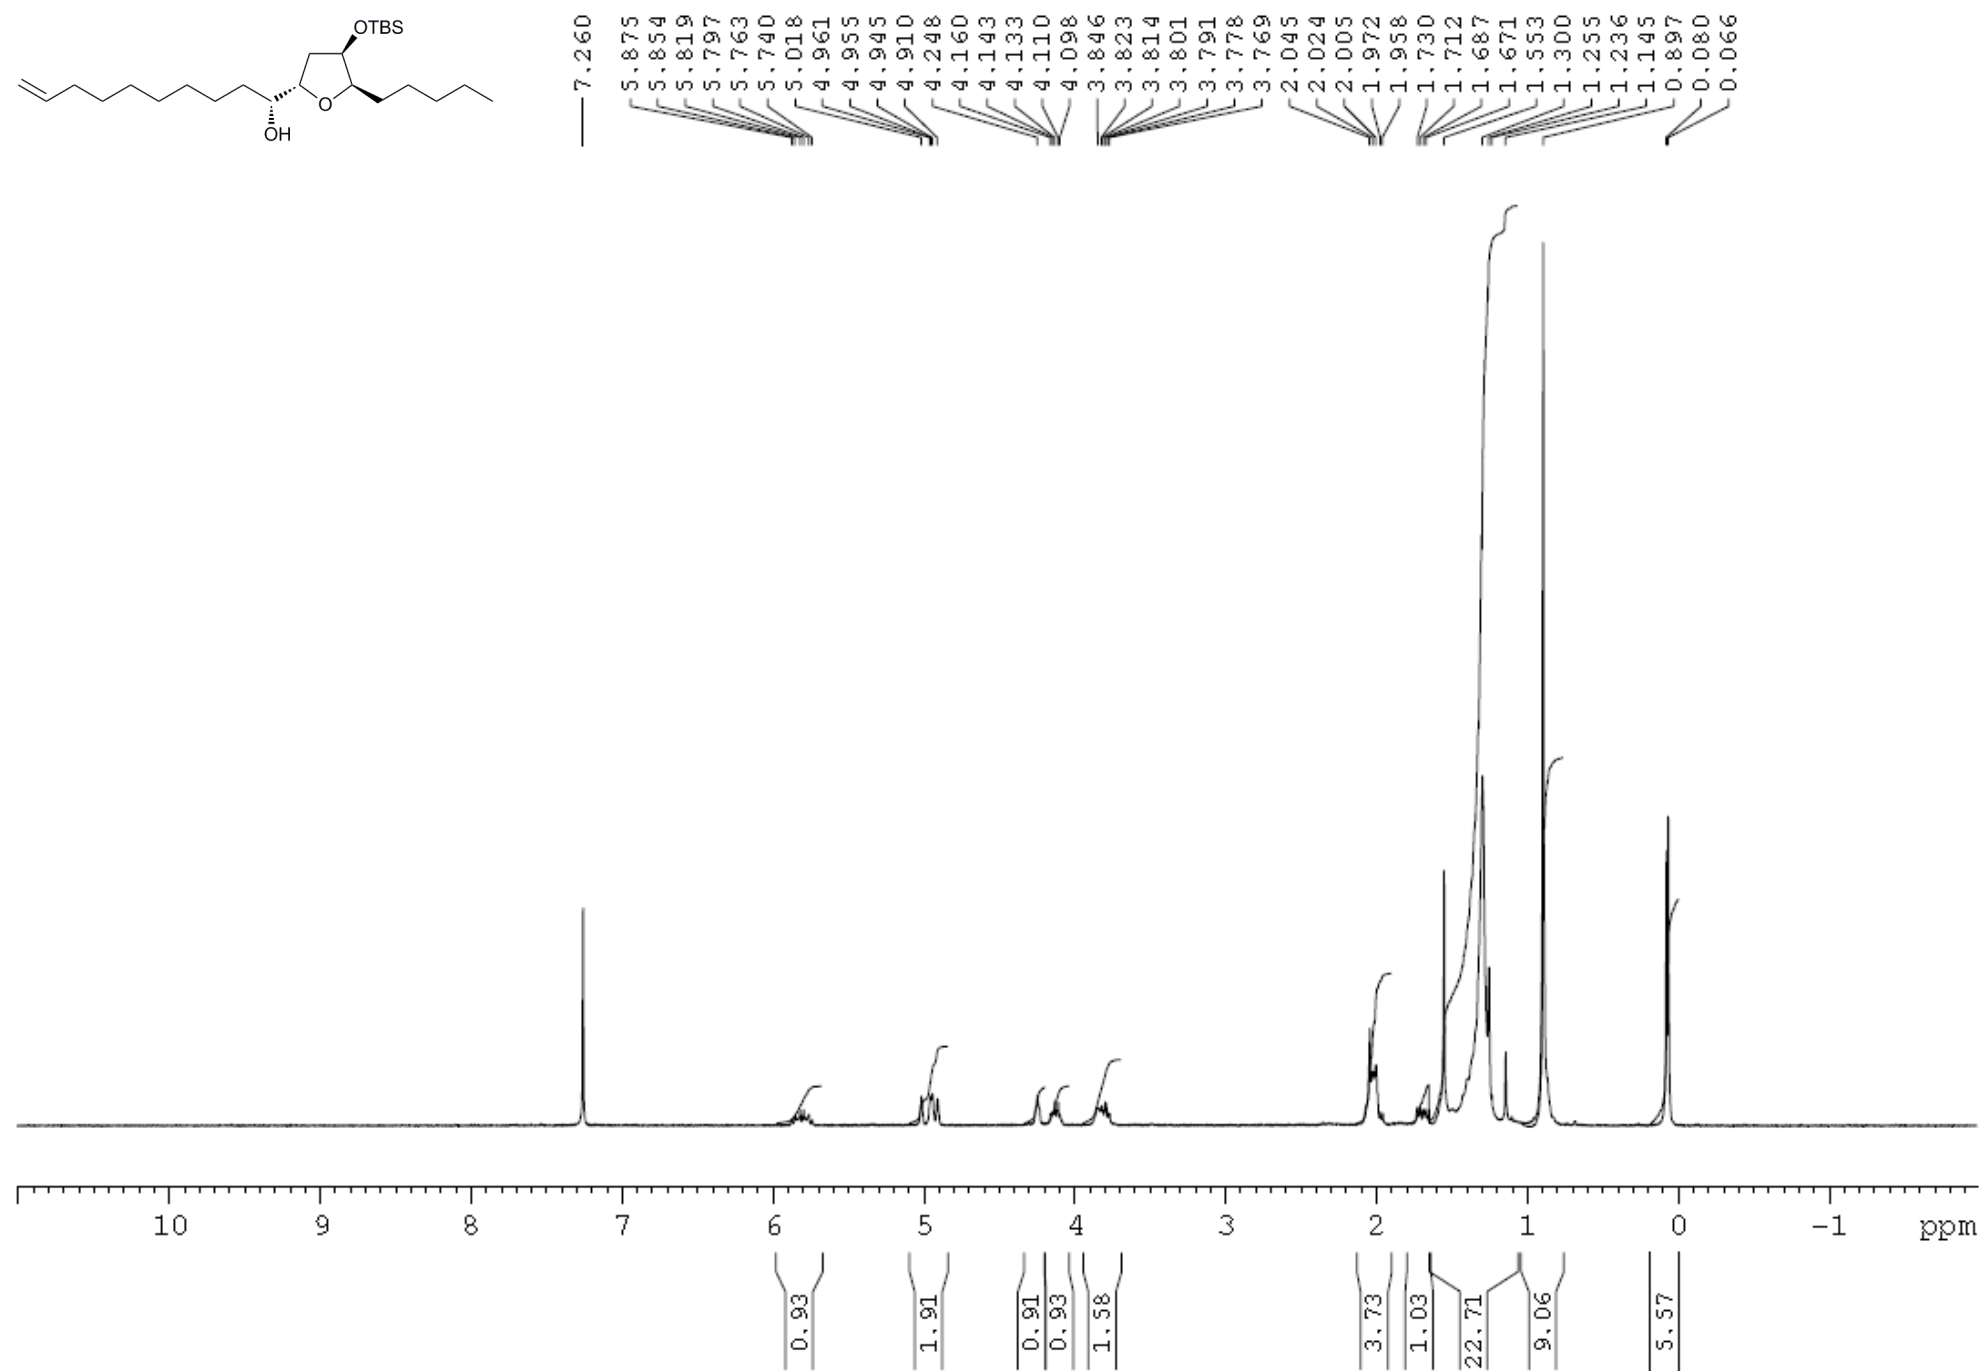

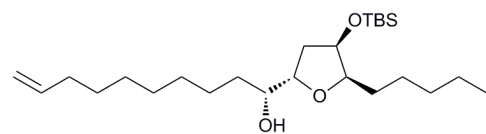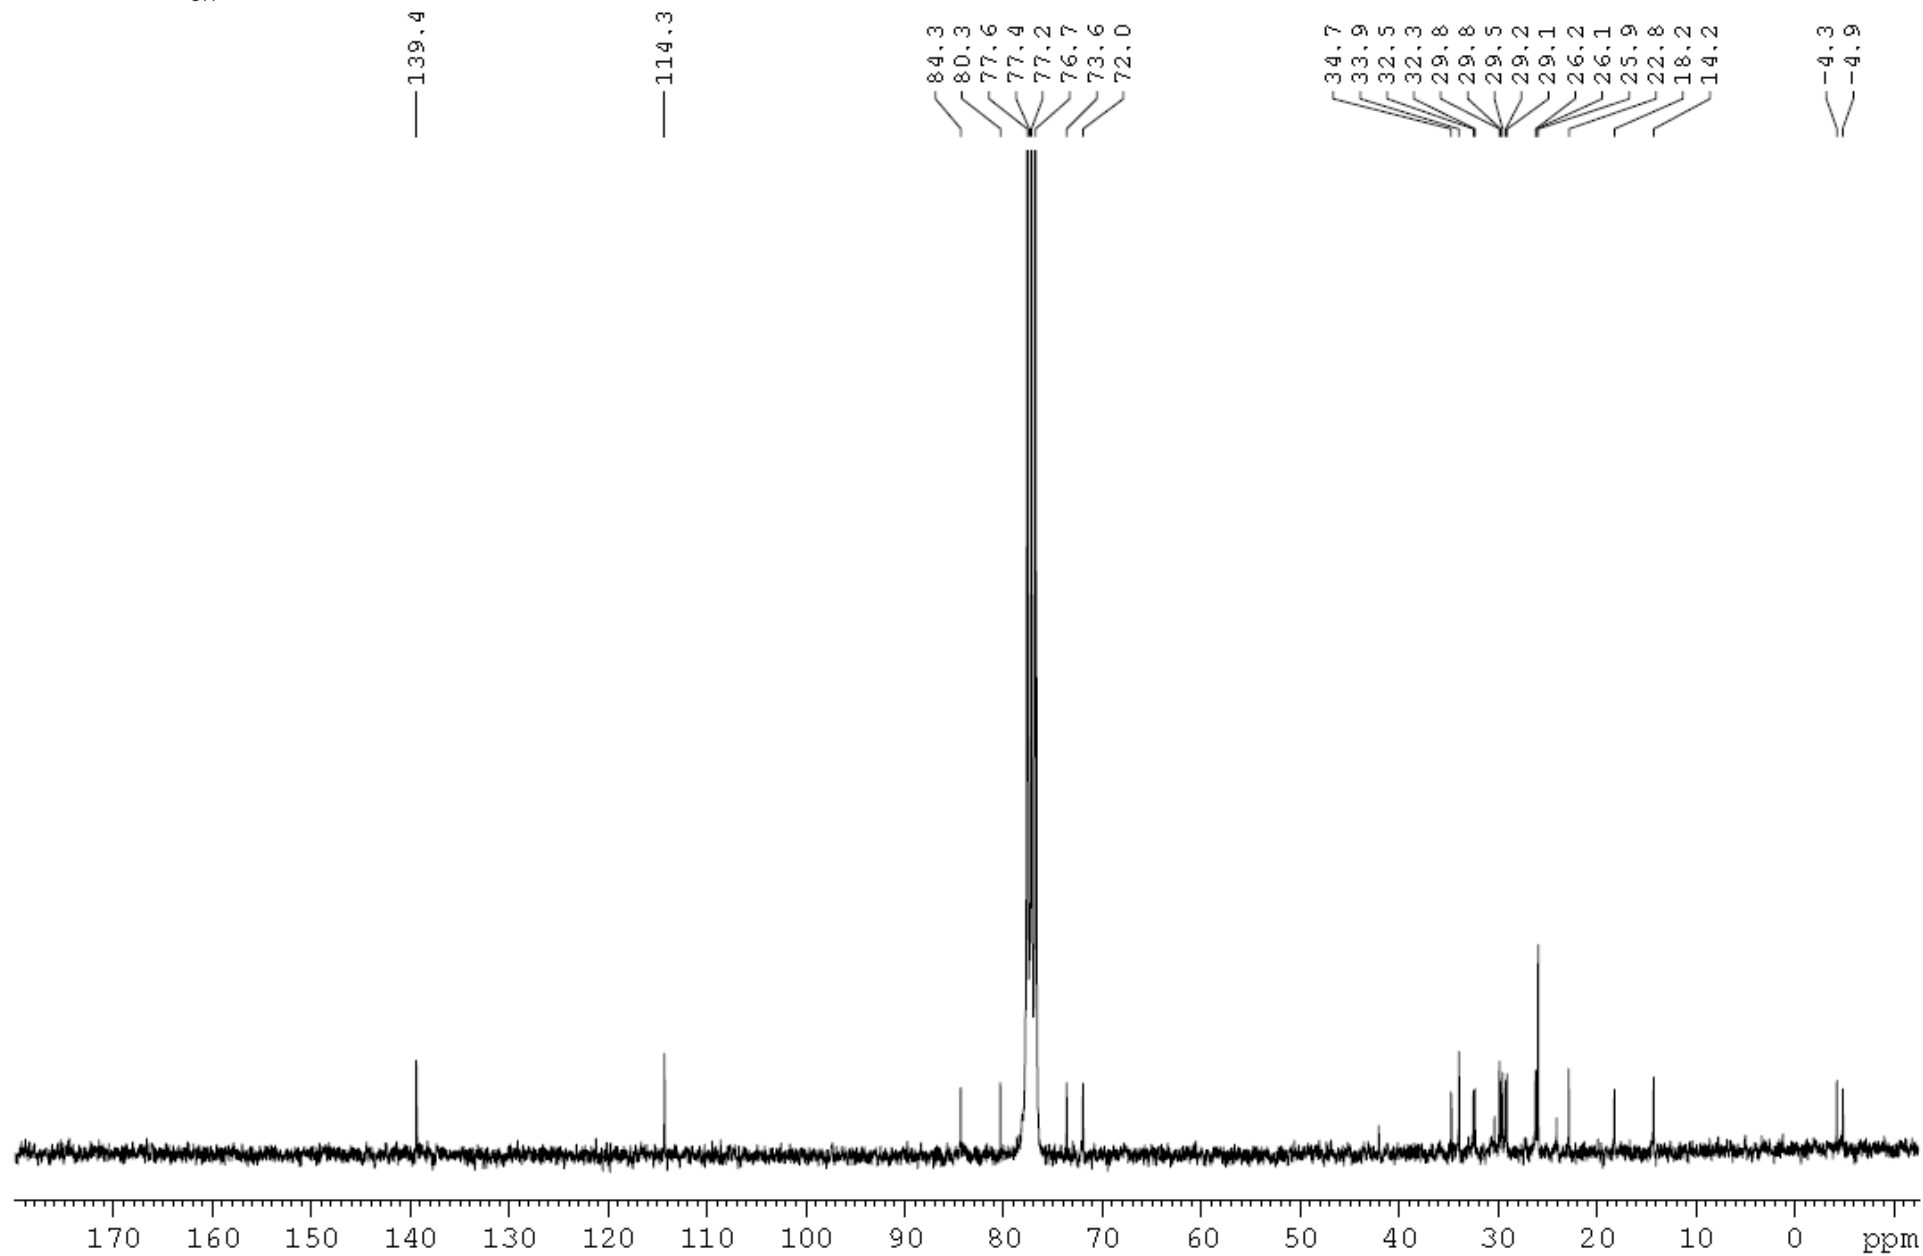

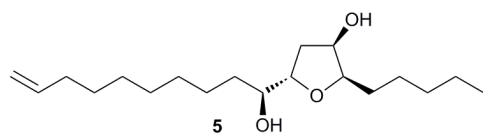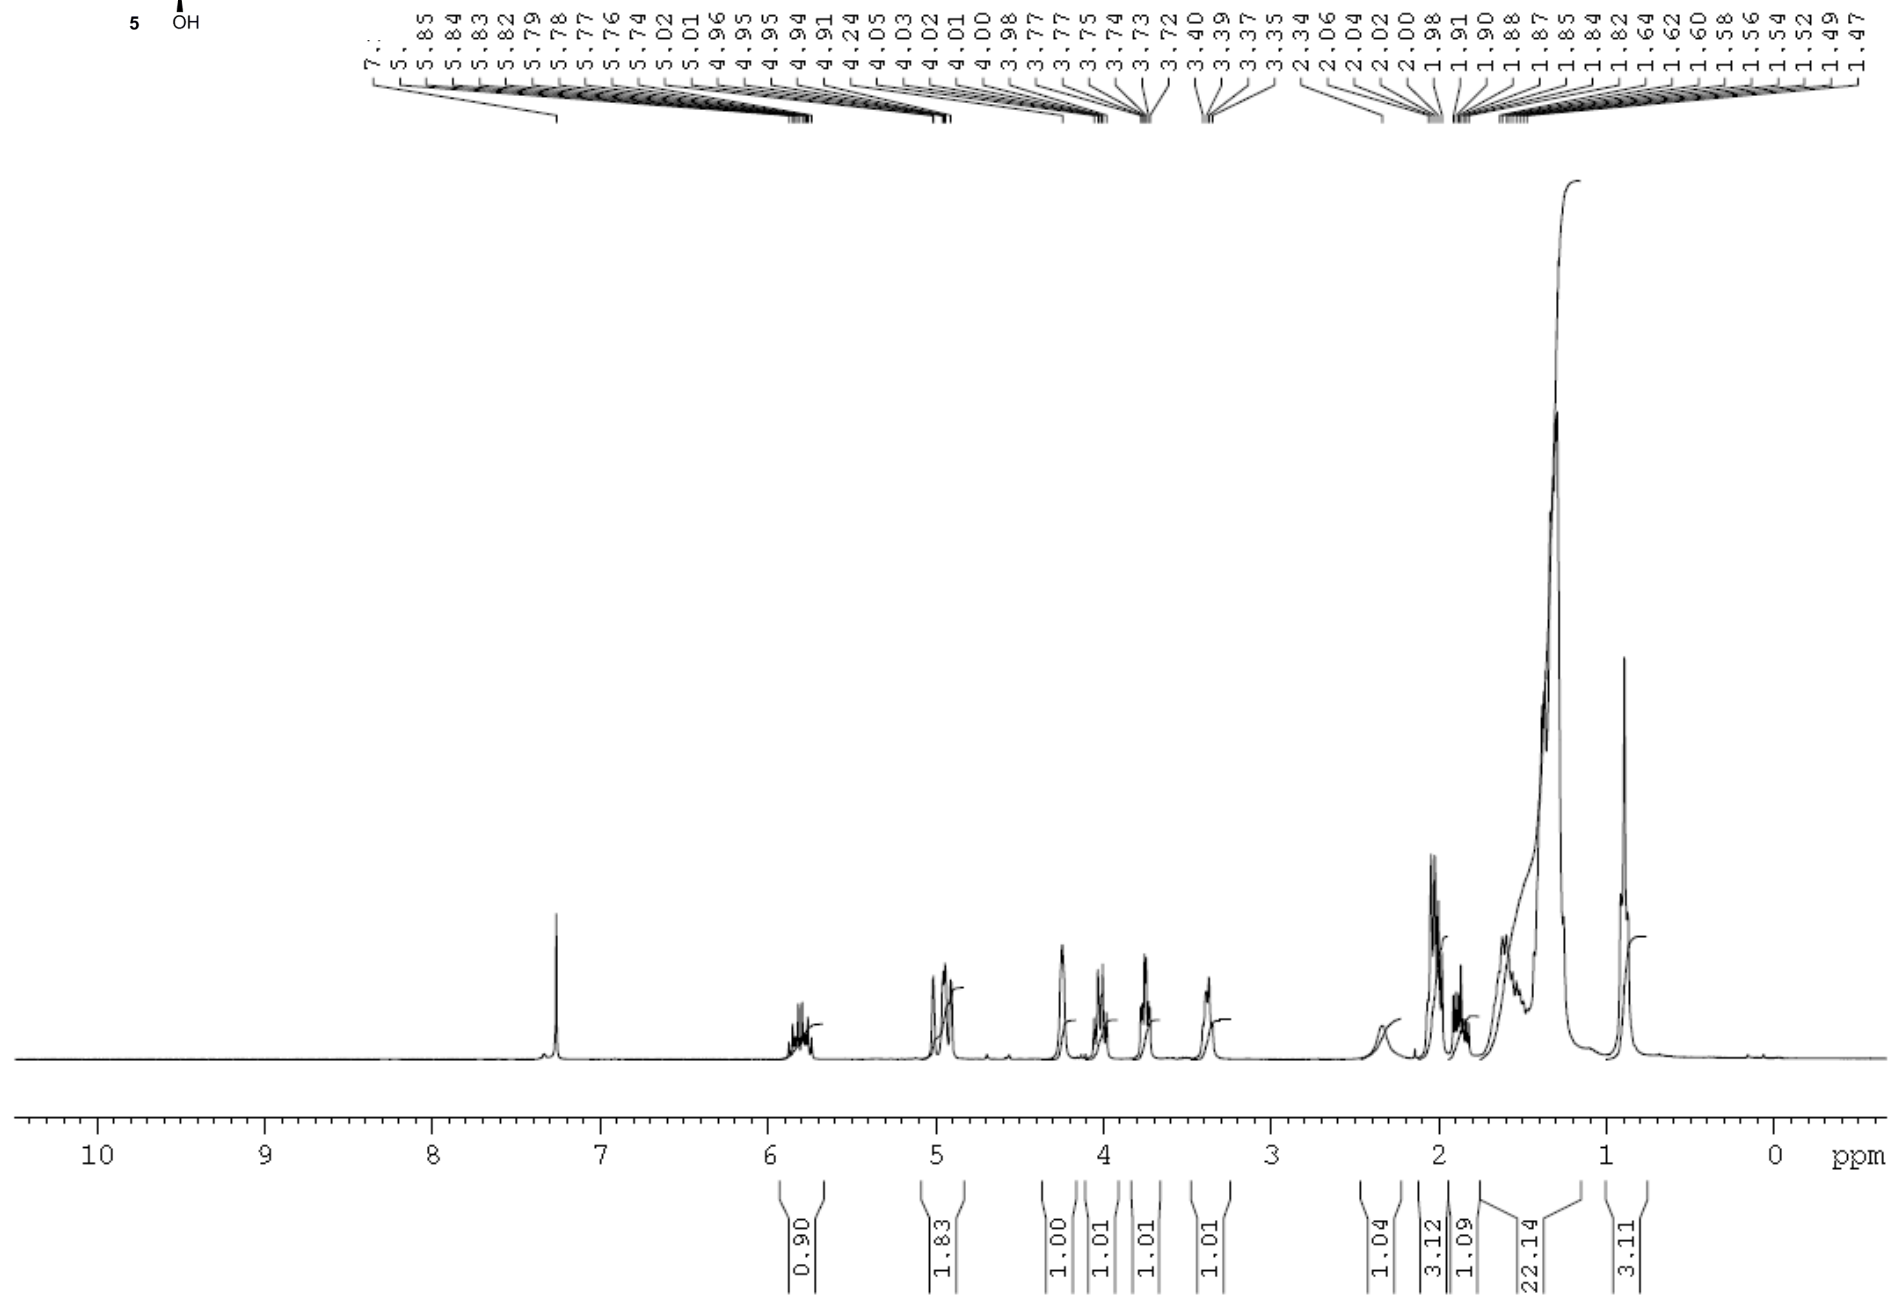

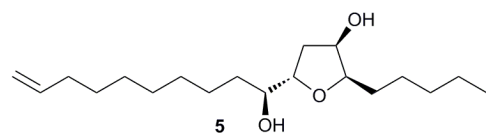

— 139.4

— 114.3

82.7  
80.4  
77.6  
77.2  
76.8  
74.3  
73.7

38.1  
34.0  
33.4  
32.2  
29.8  
29.6  
29.3  
29.1  
29.0  
26.2  
25.8  
22.8  
14.2

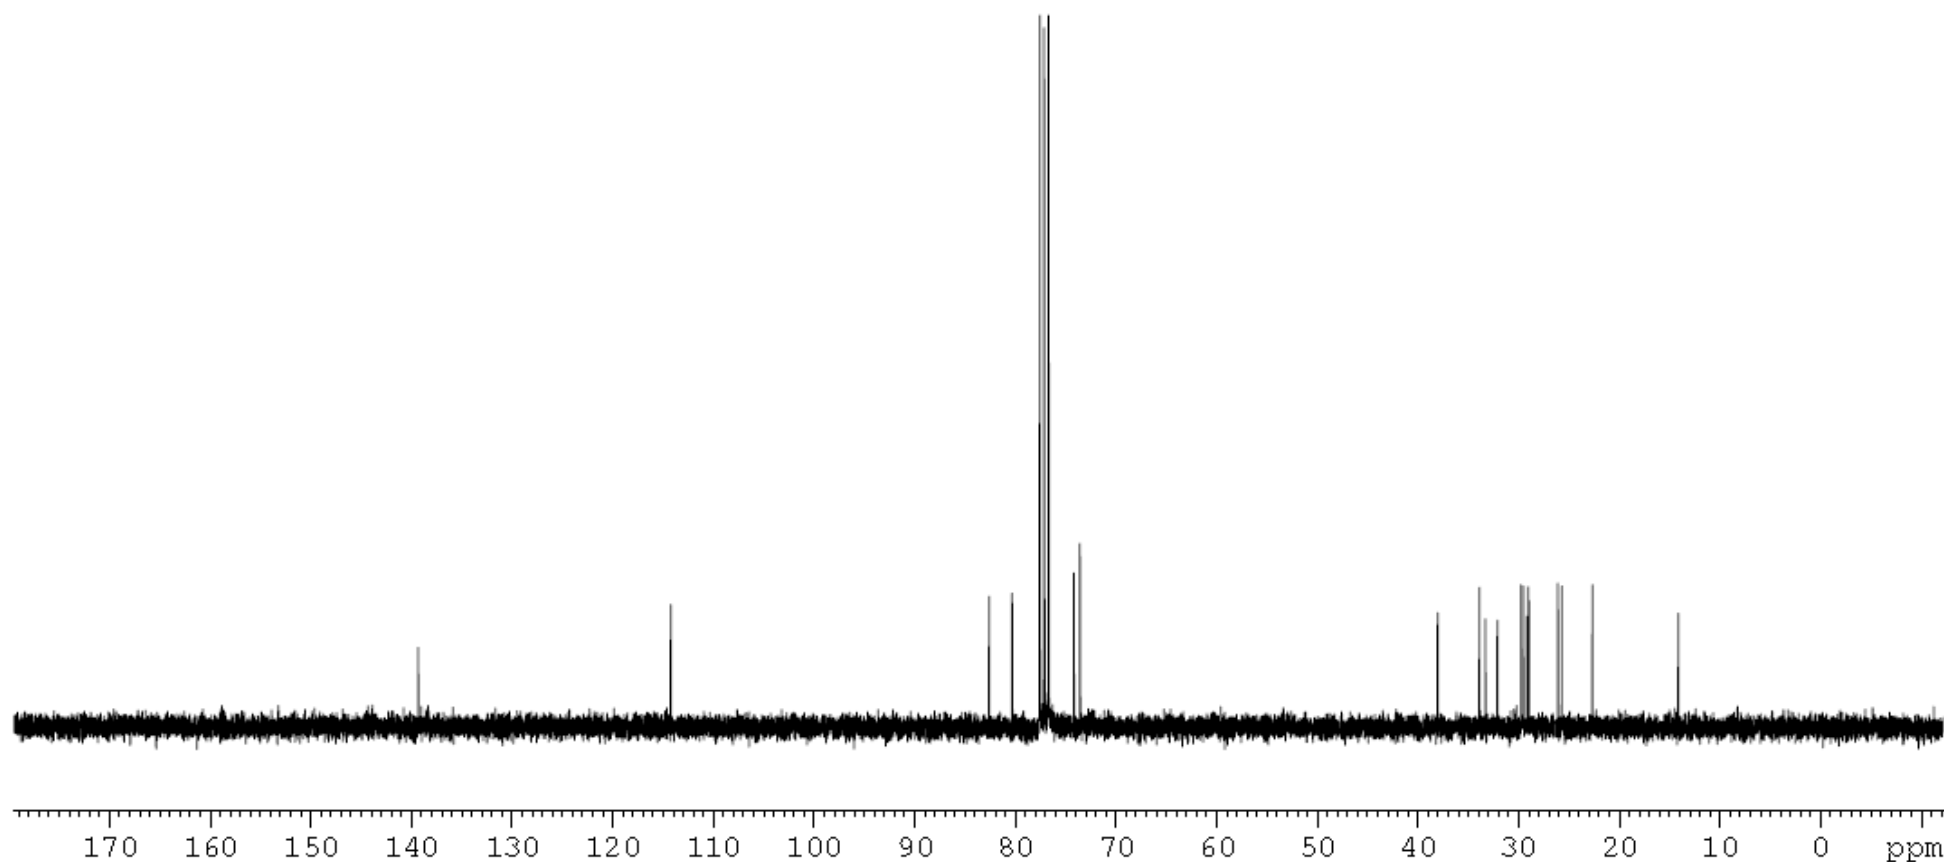

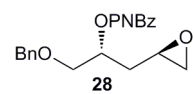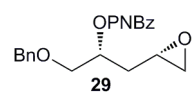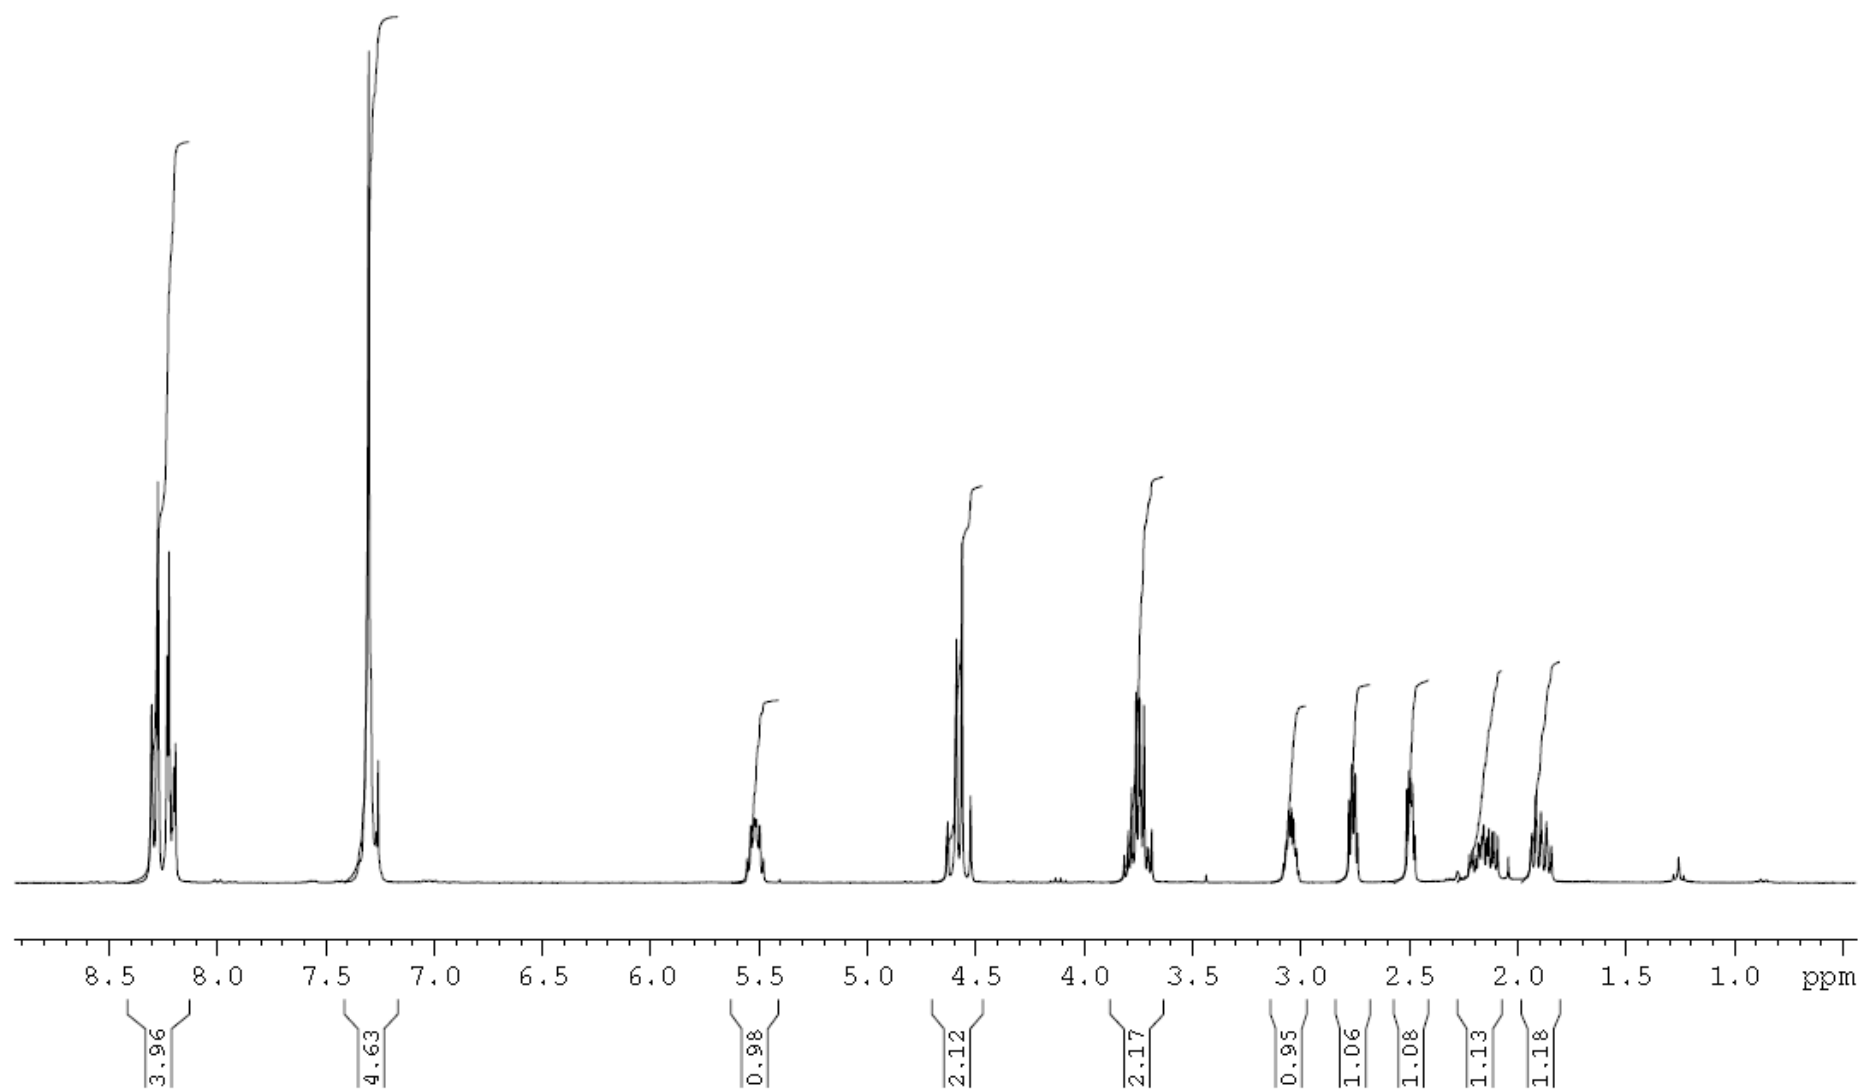



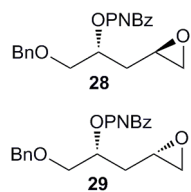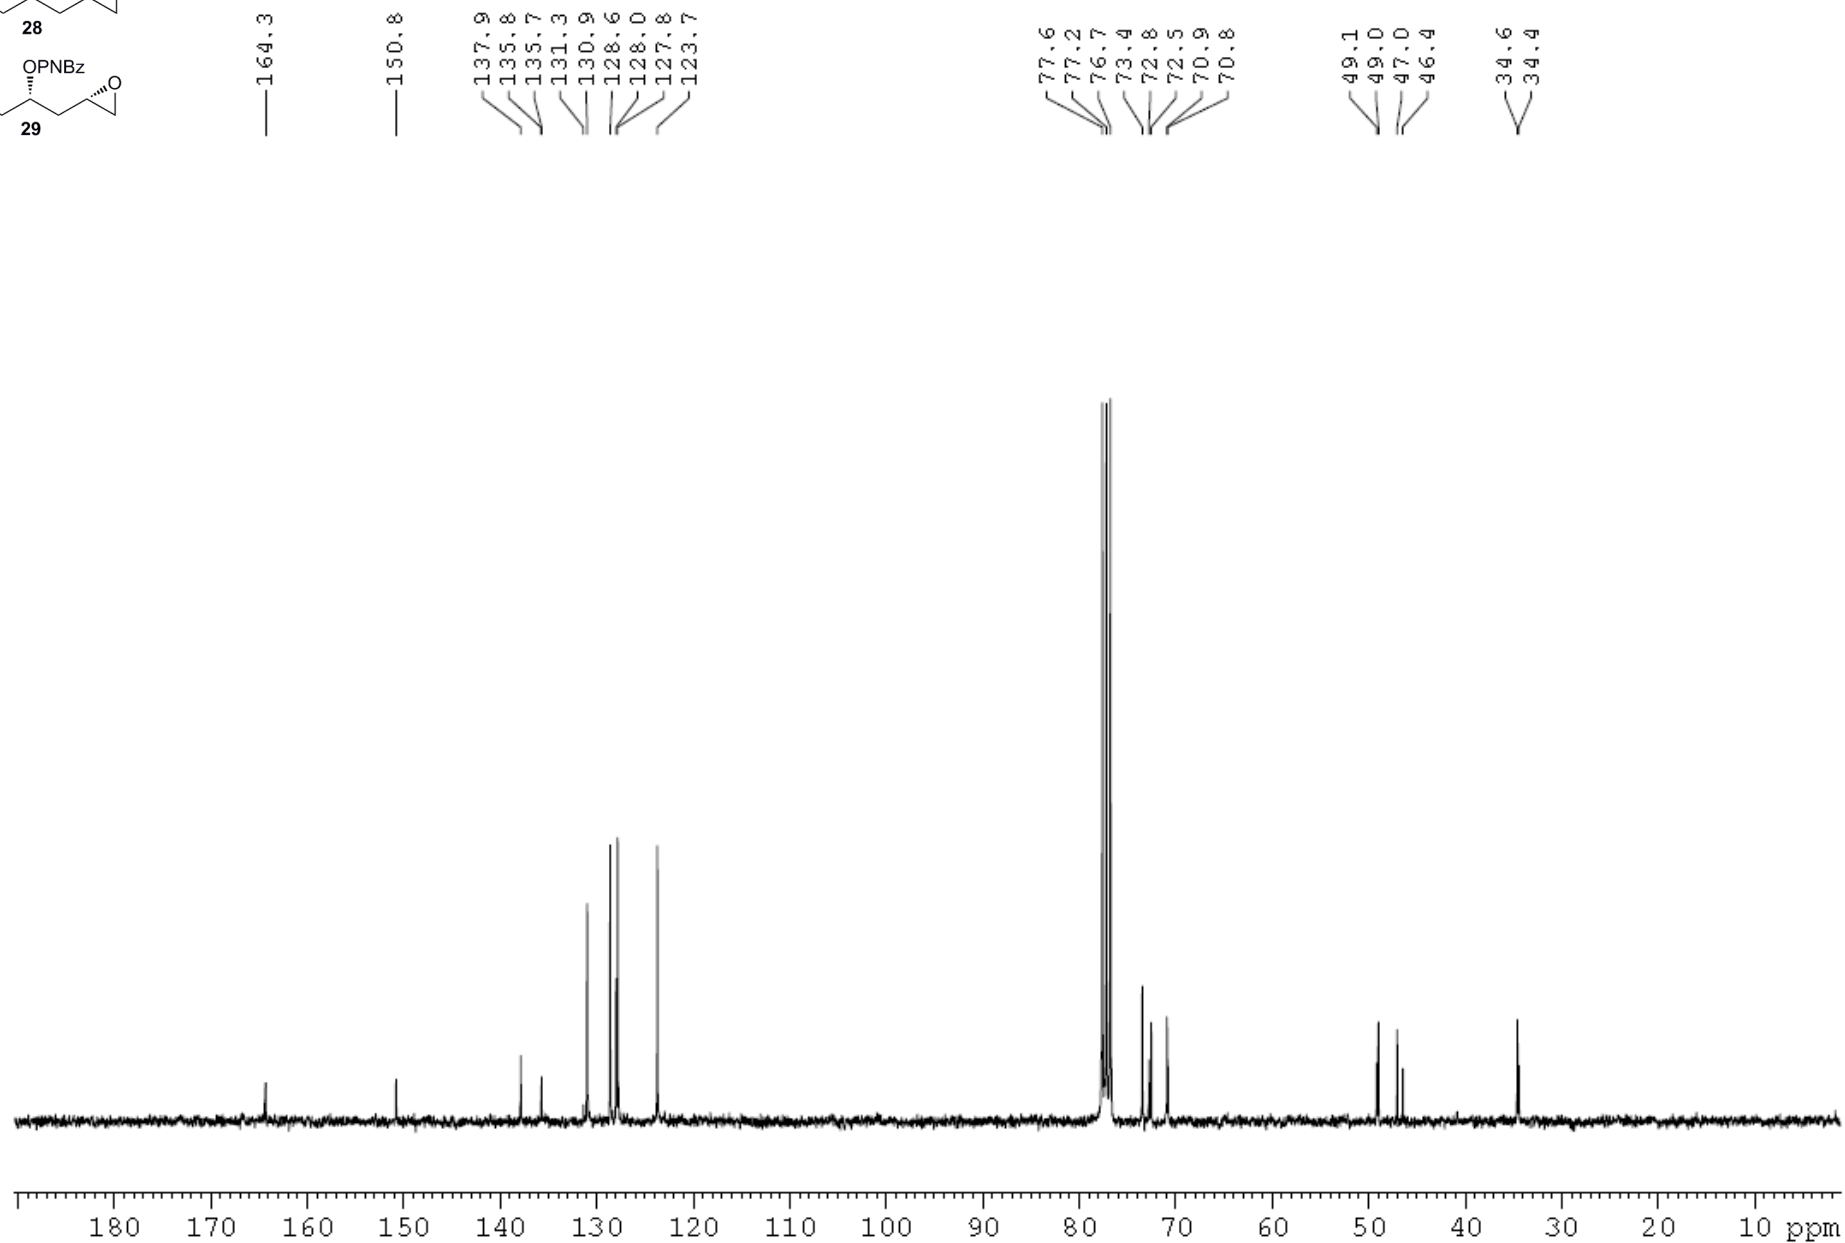

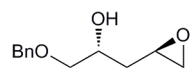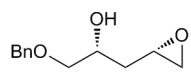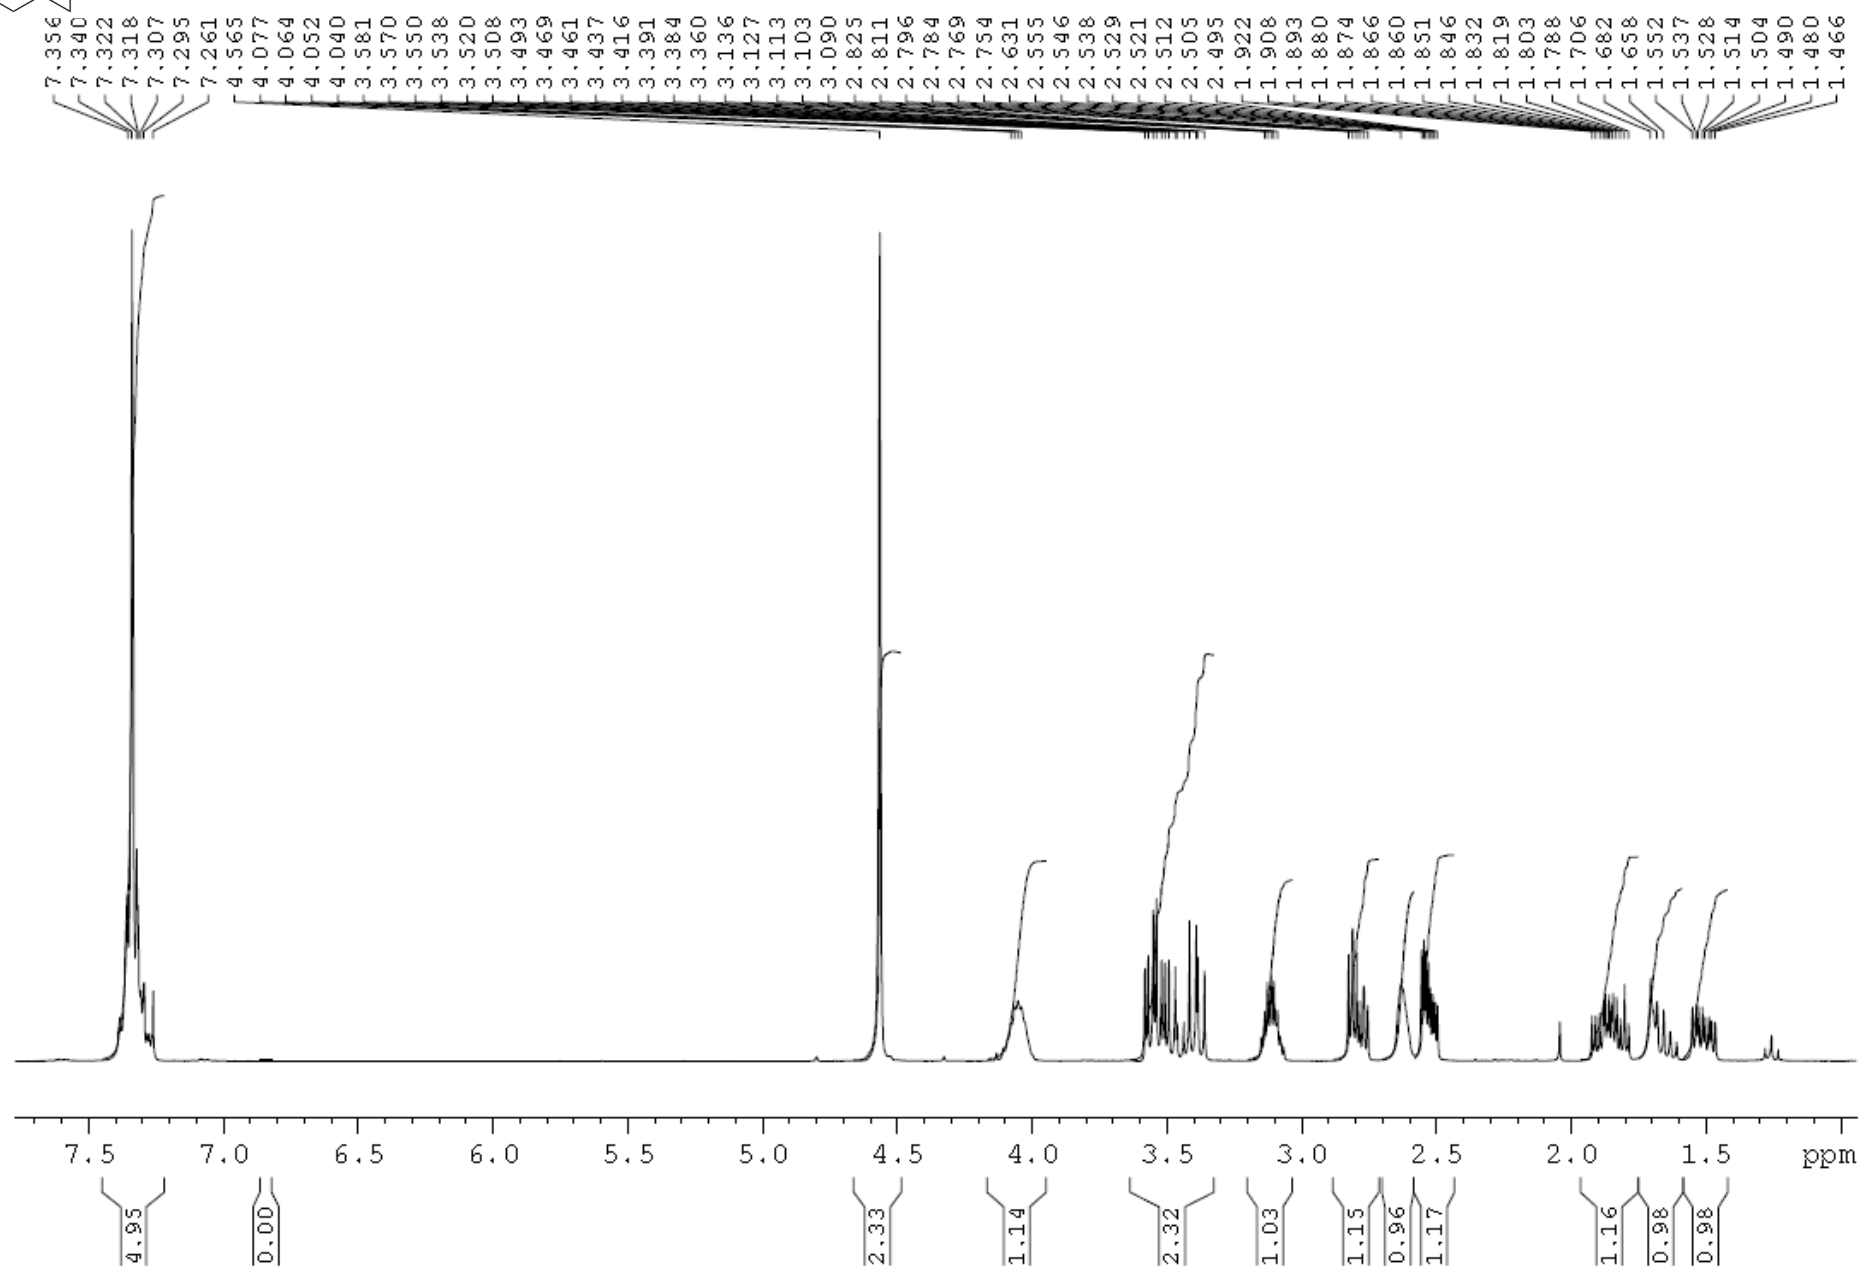

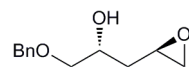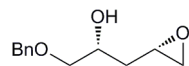

138.00

128.60

127.96

127.88

77.58

77.36

77.16

76.74

74.42

74.11

73.52

68.73

68.50

49.85

49.76

47.24

46.79

36.27

36.12

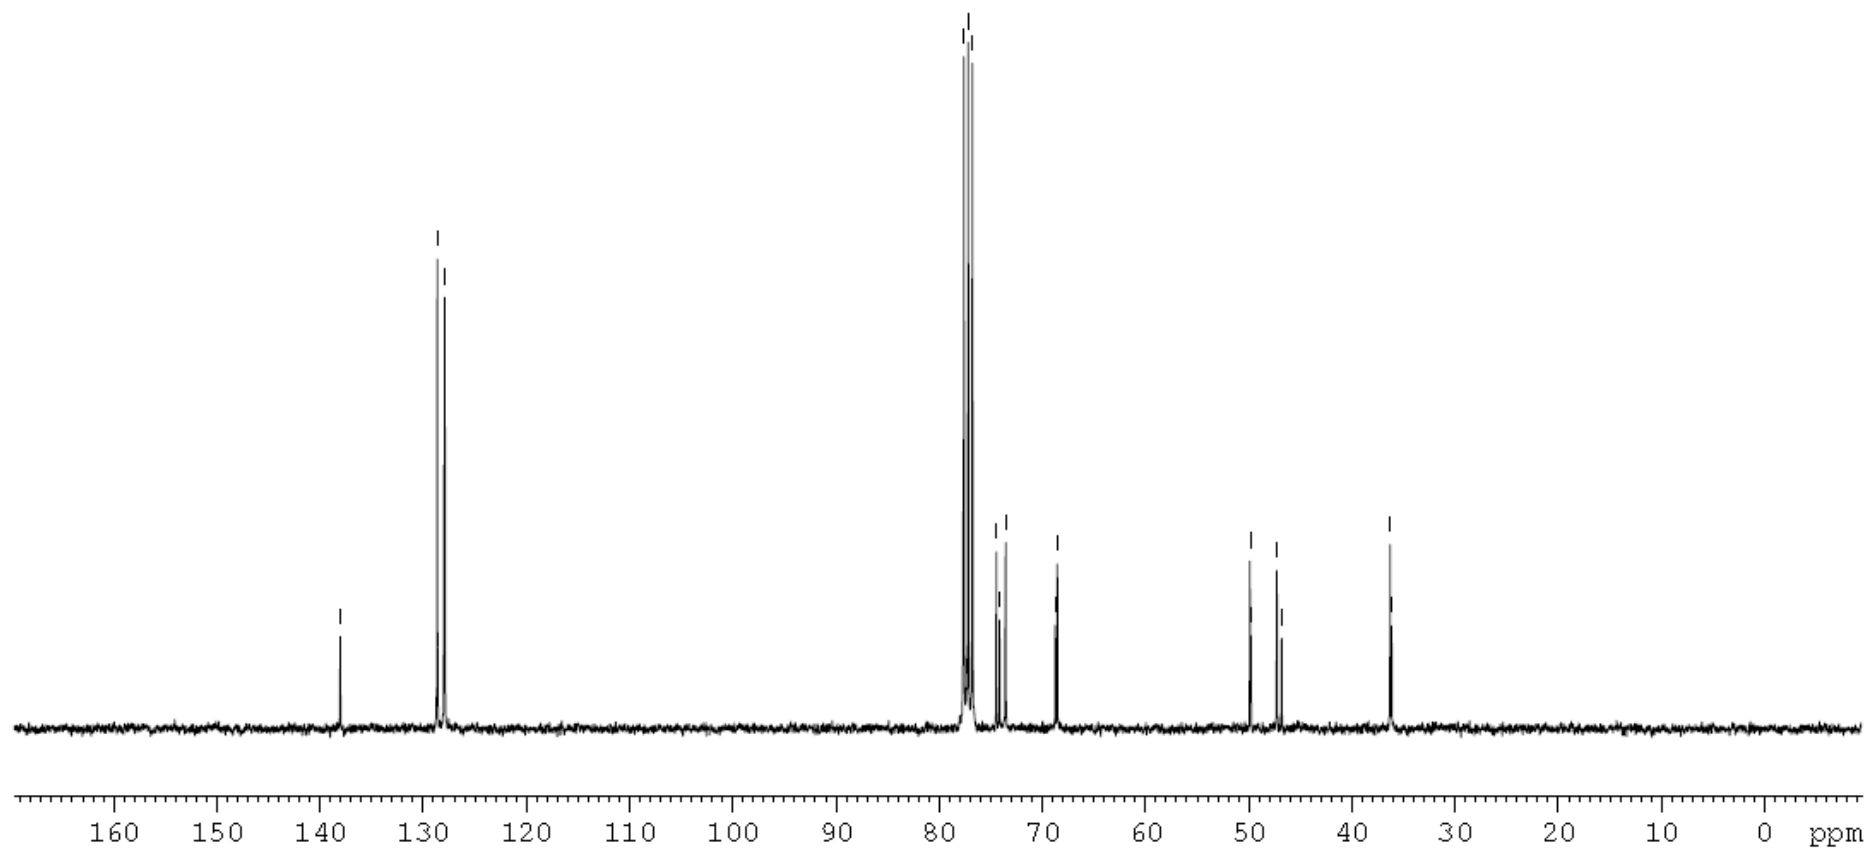

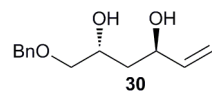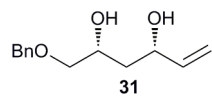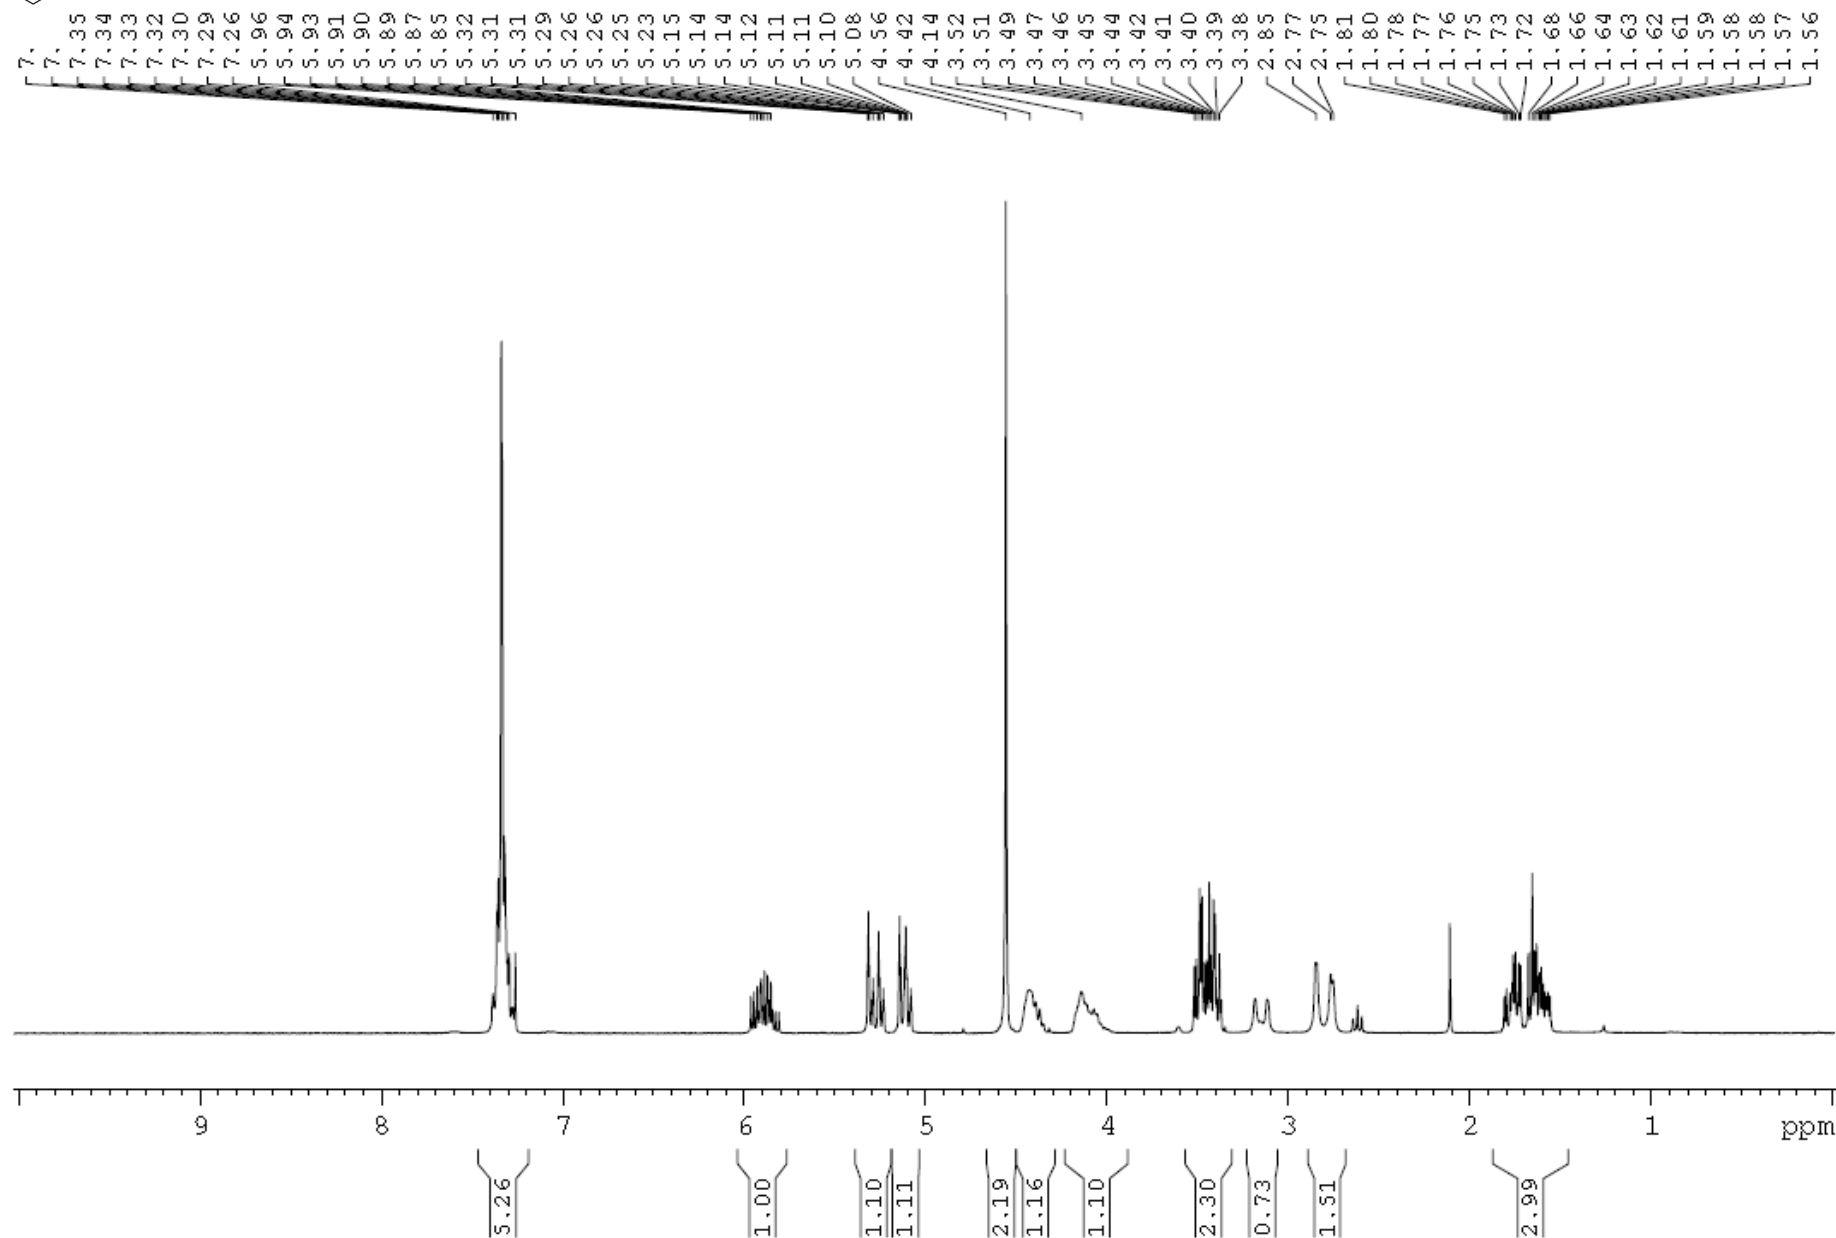

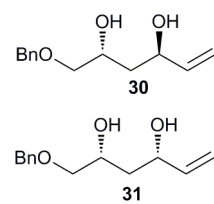

141.1  
 140.9  
 138.3  
 128.9  
 128.2  
 128.2  
 115.0  
 114.7

77.9  
 77.4  
 77.0  
 74.8  
 73.8  
 73.8  
 73.1  
 71.0  
 70.4  
 68.2

39.9  
 39.3

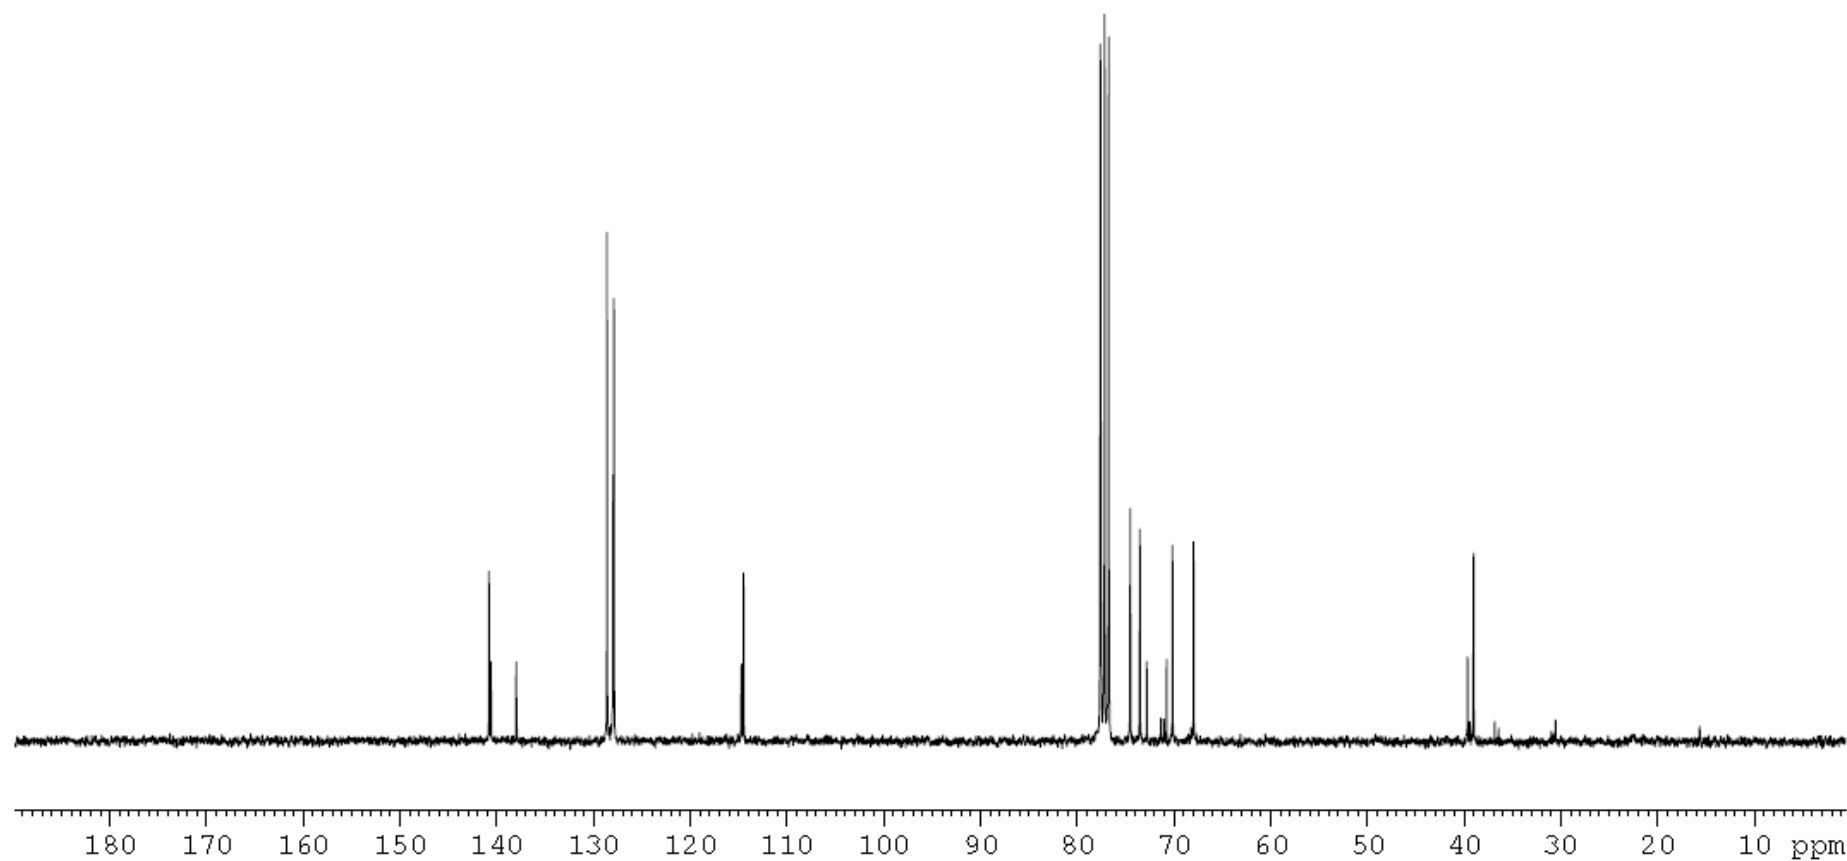

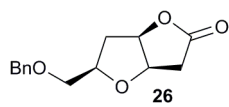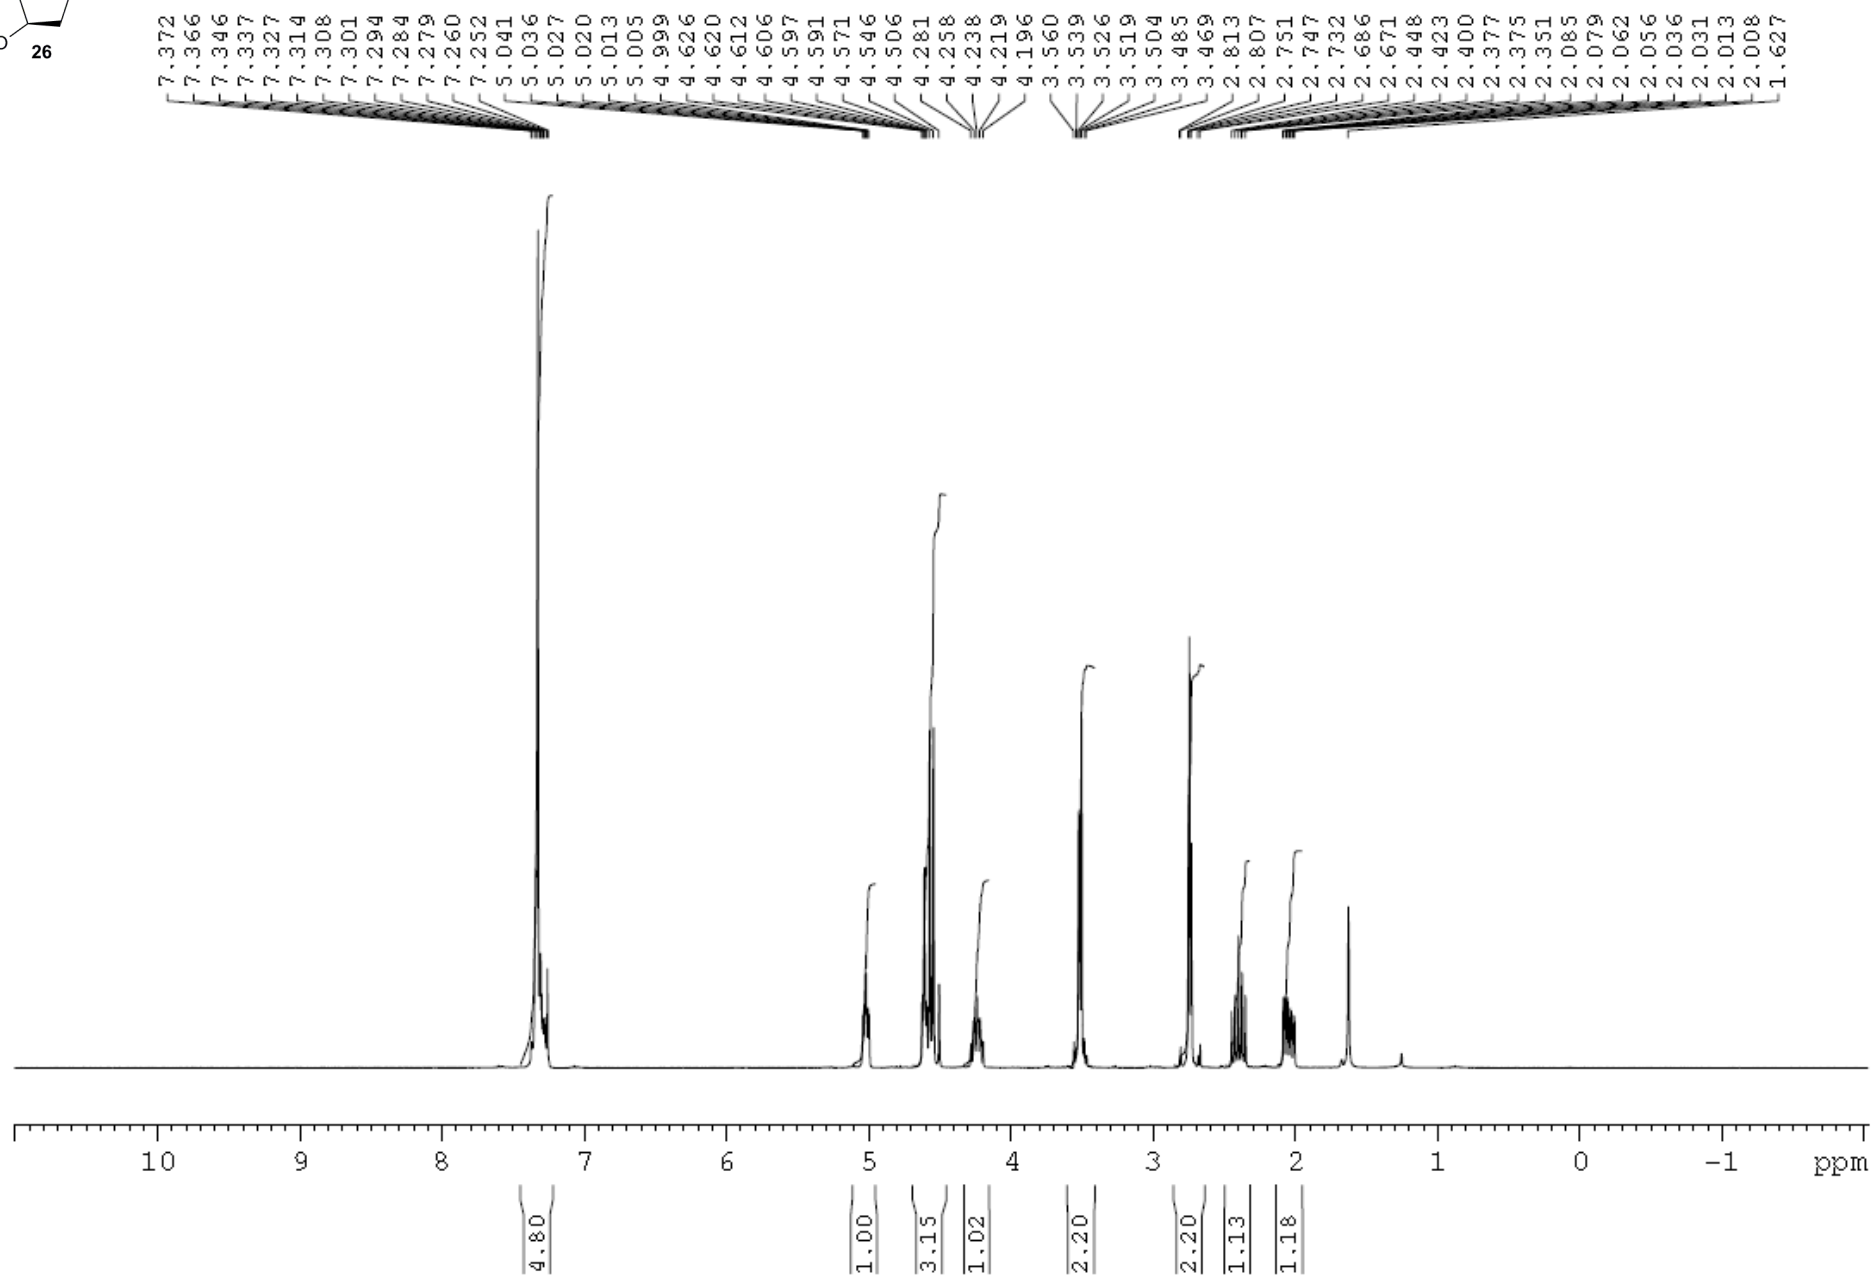

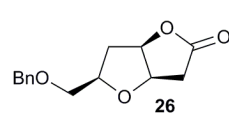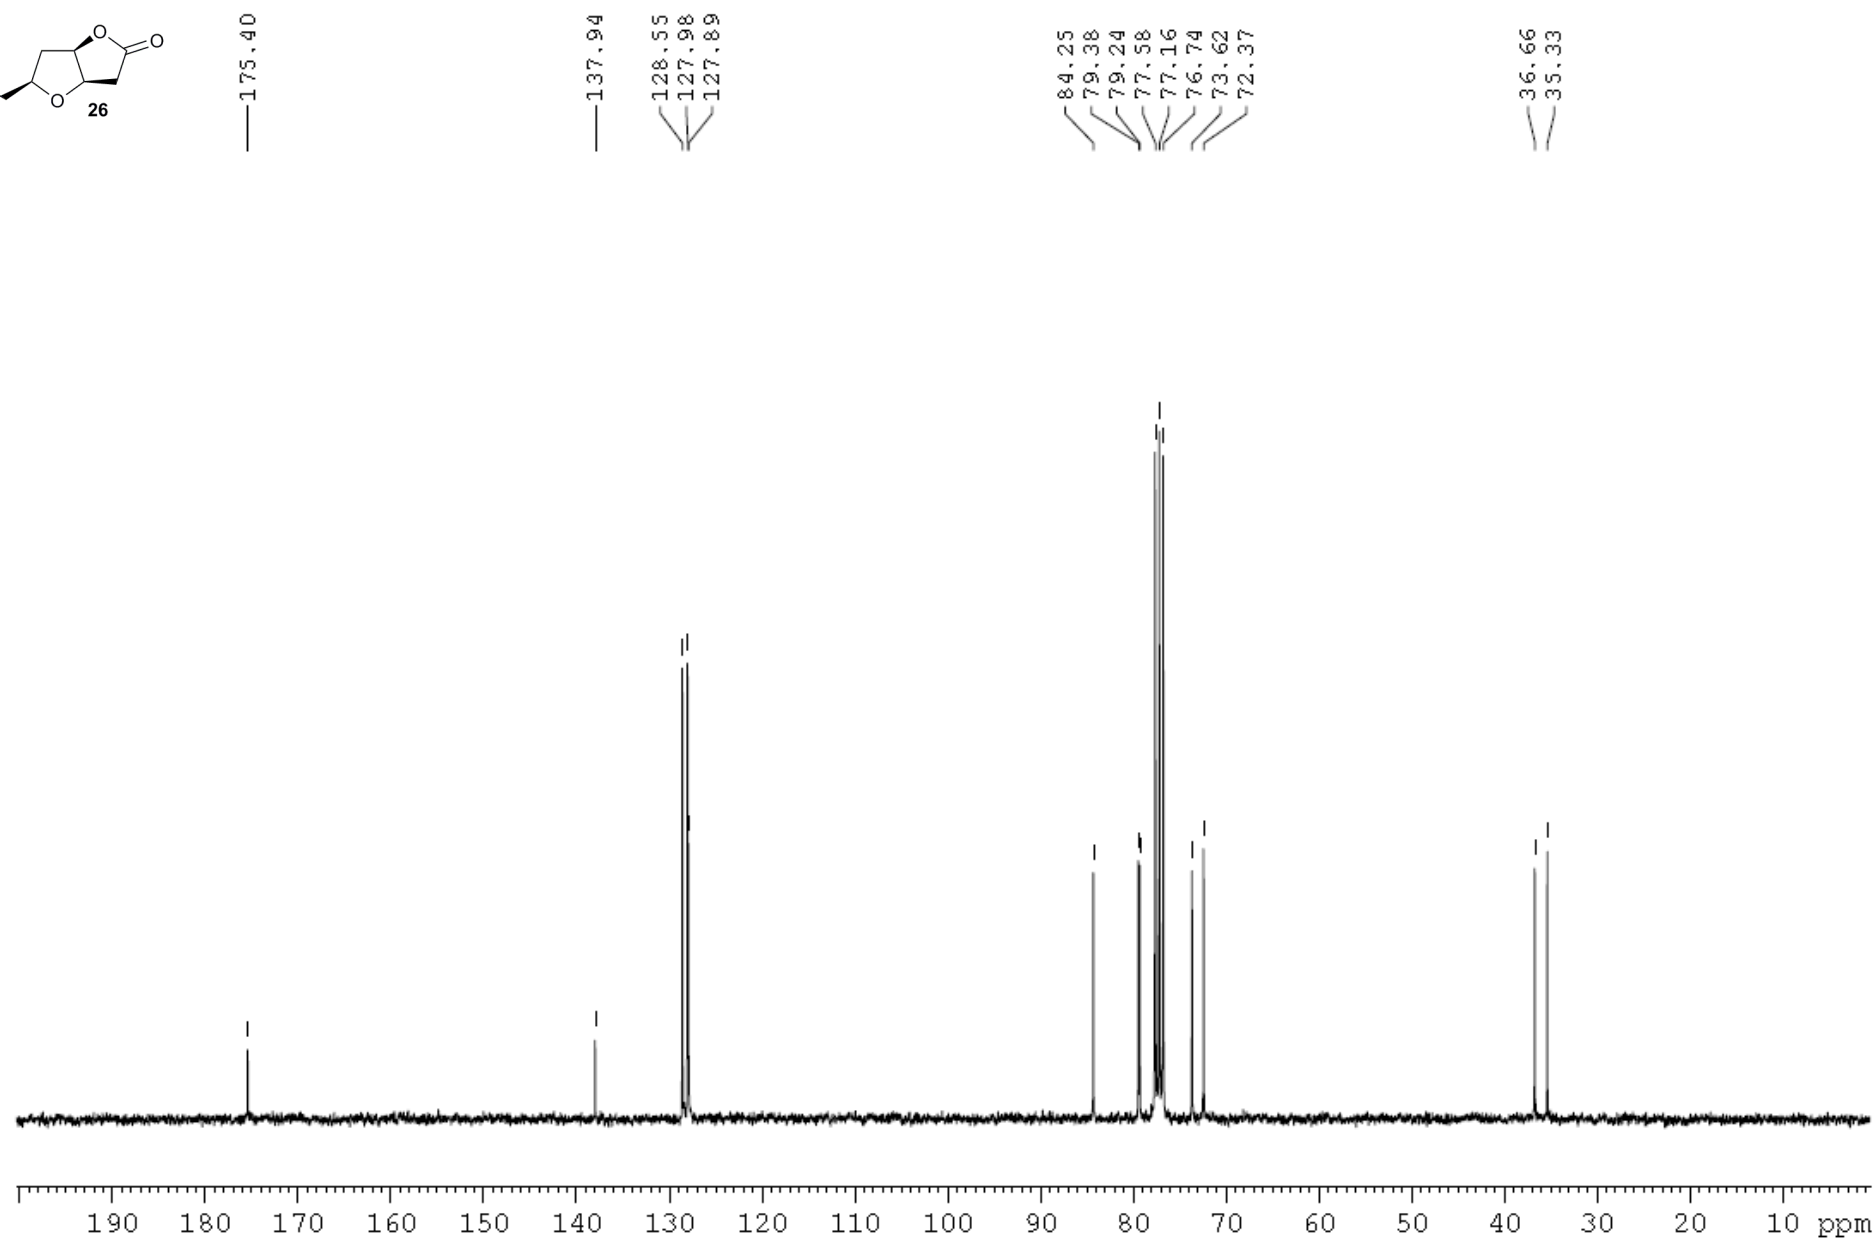

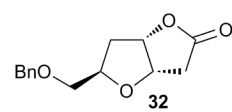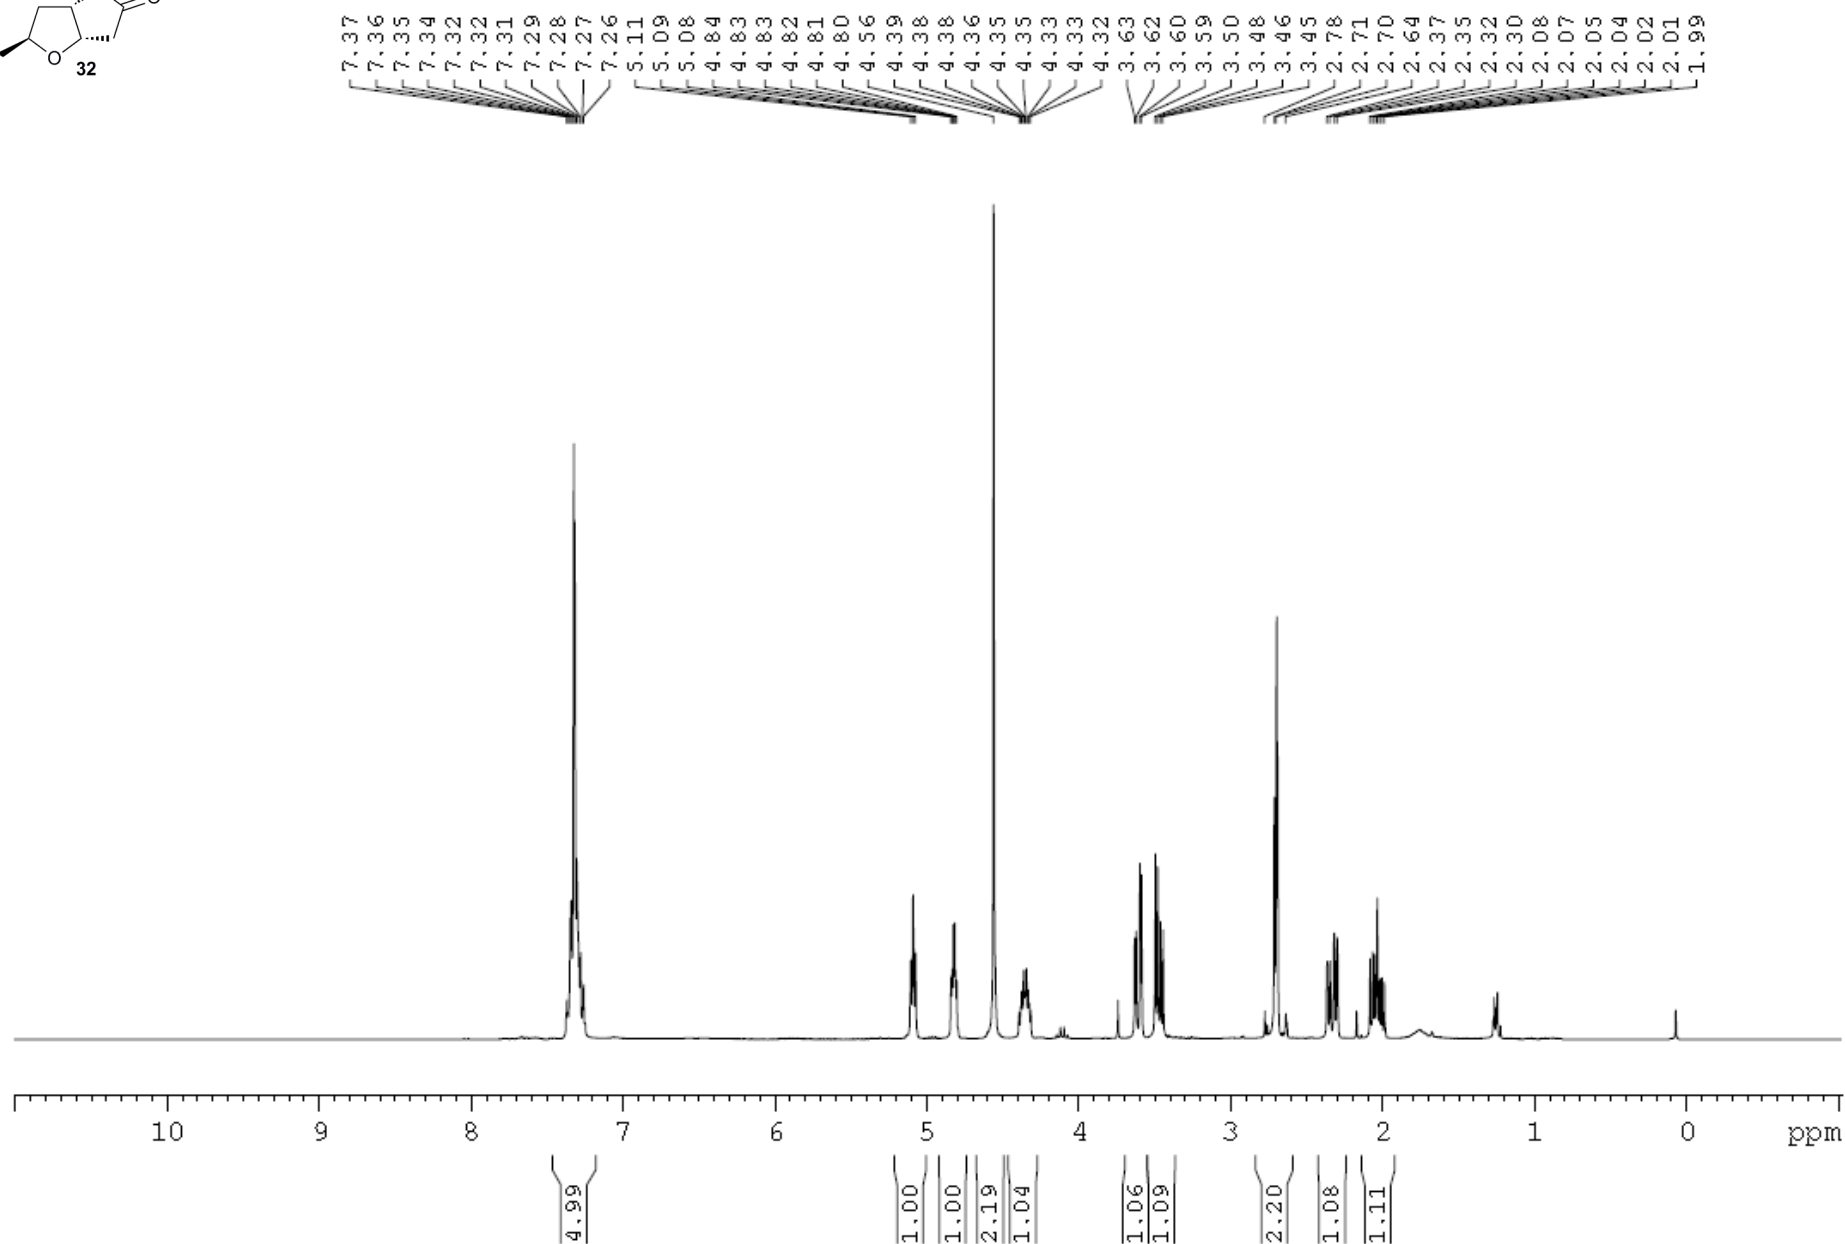



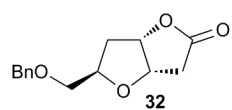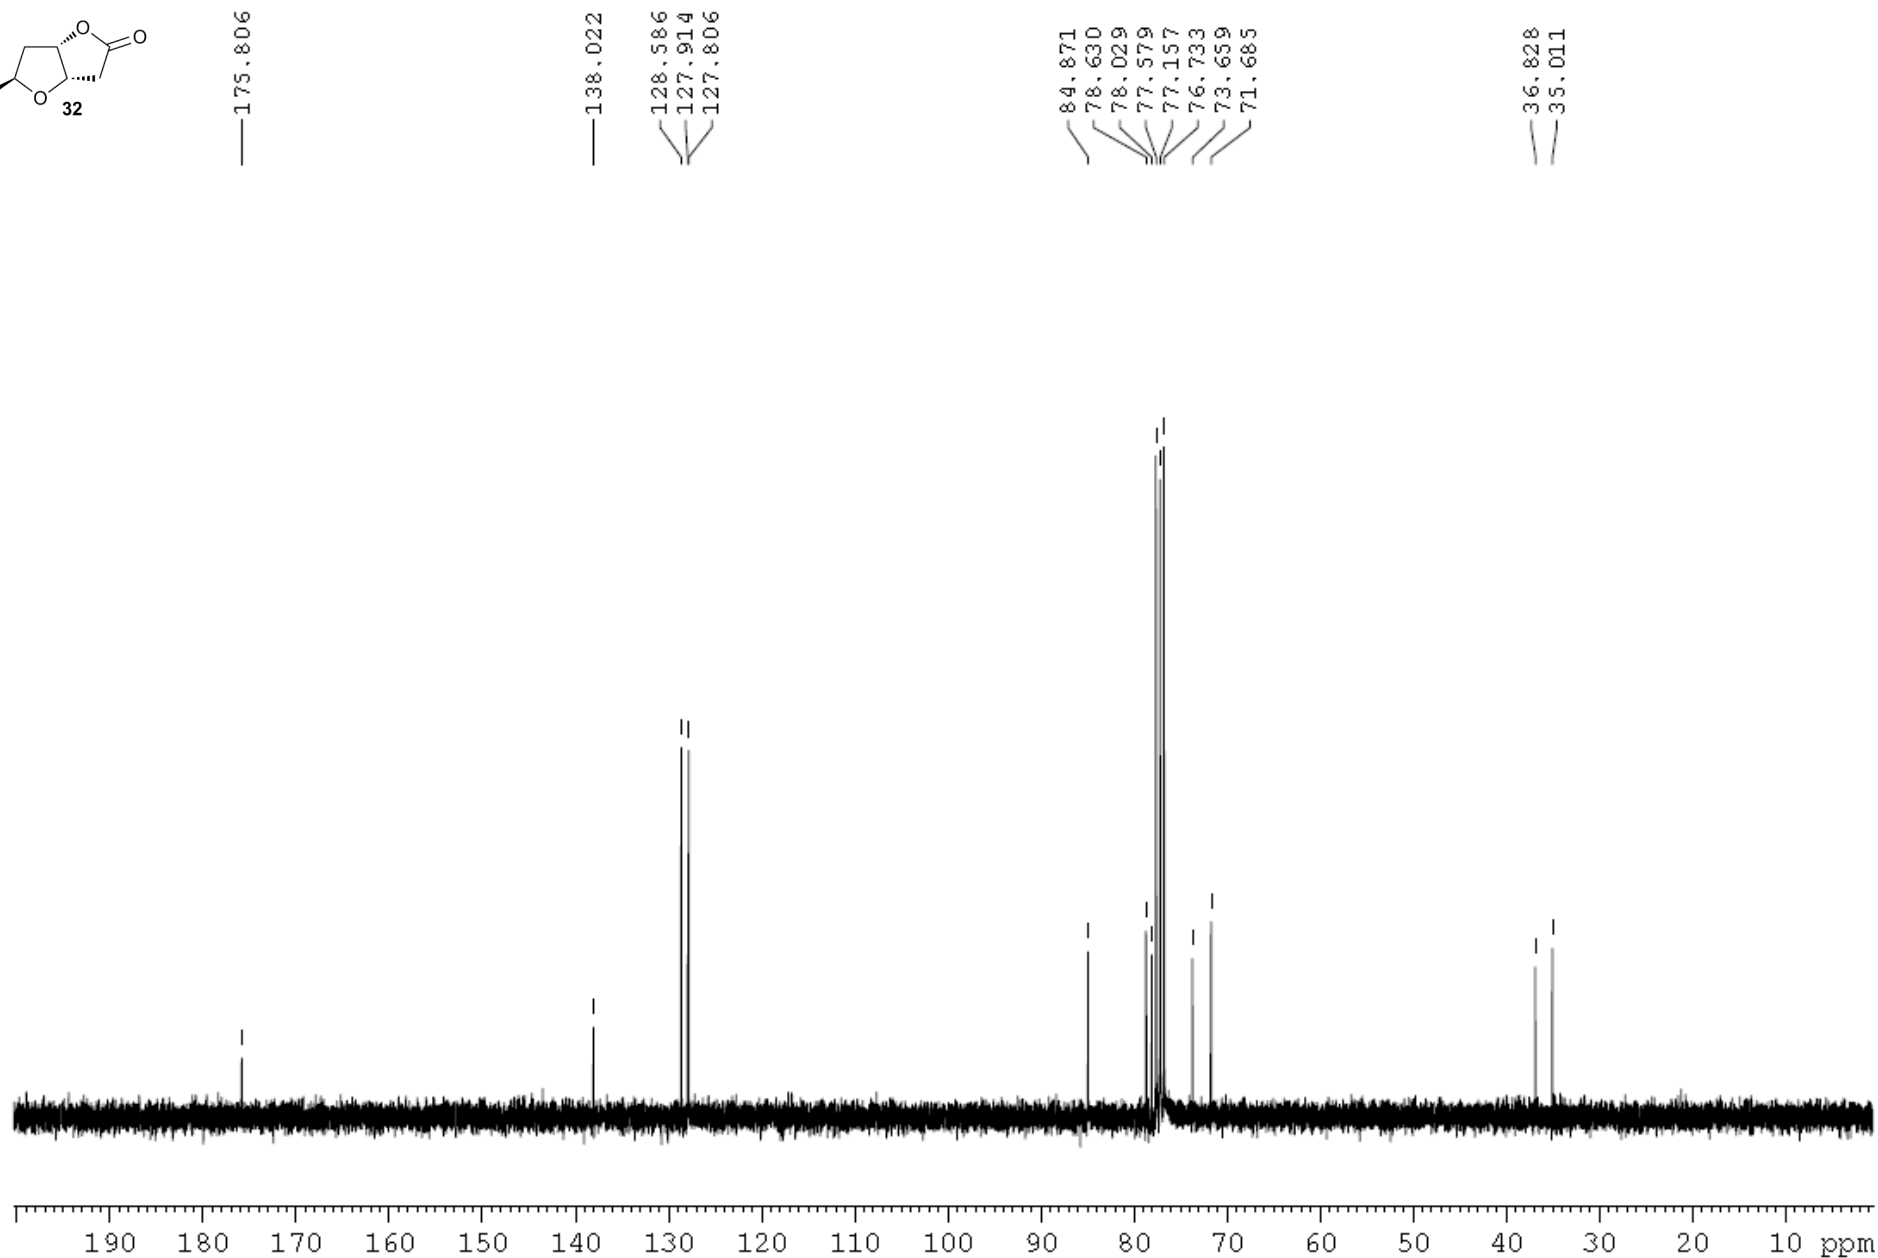

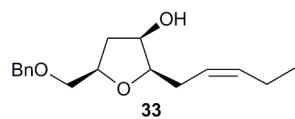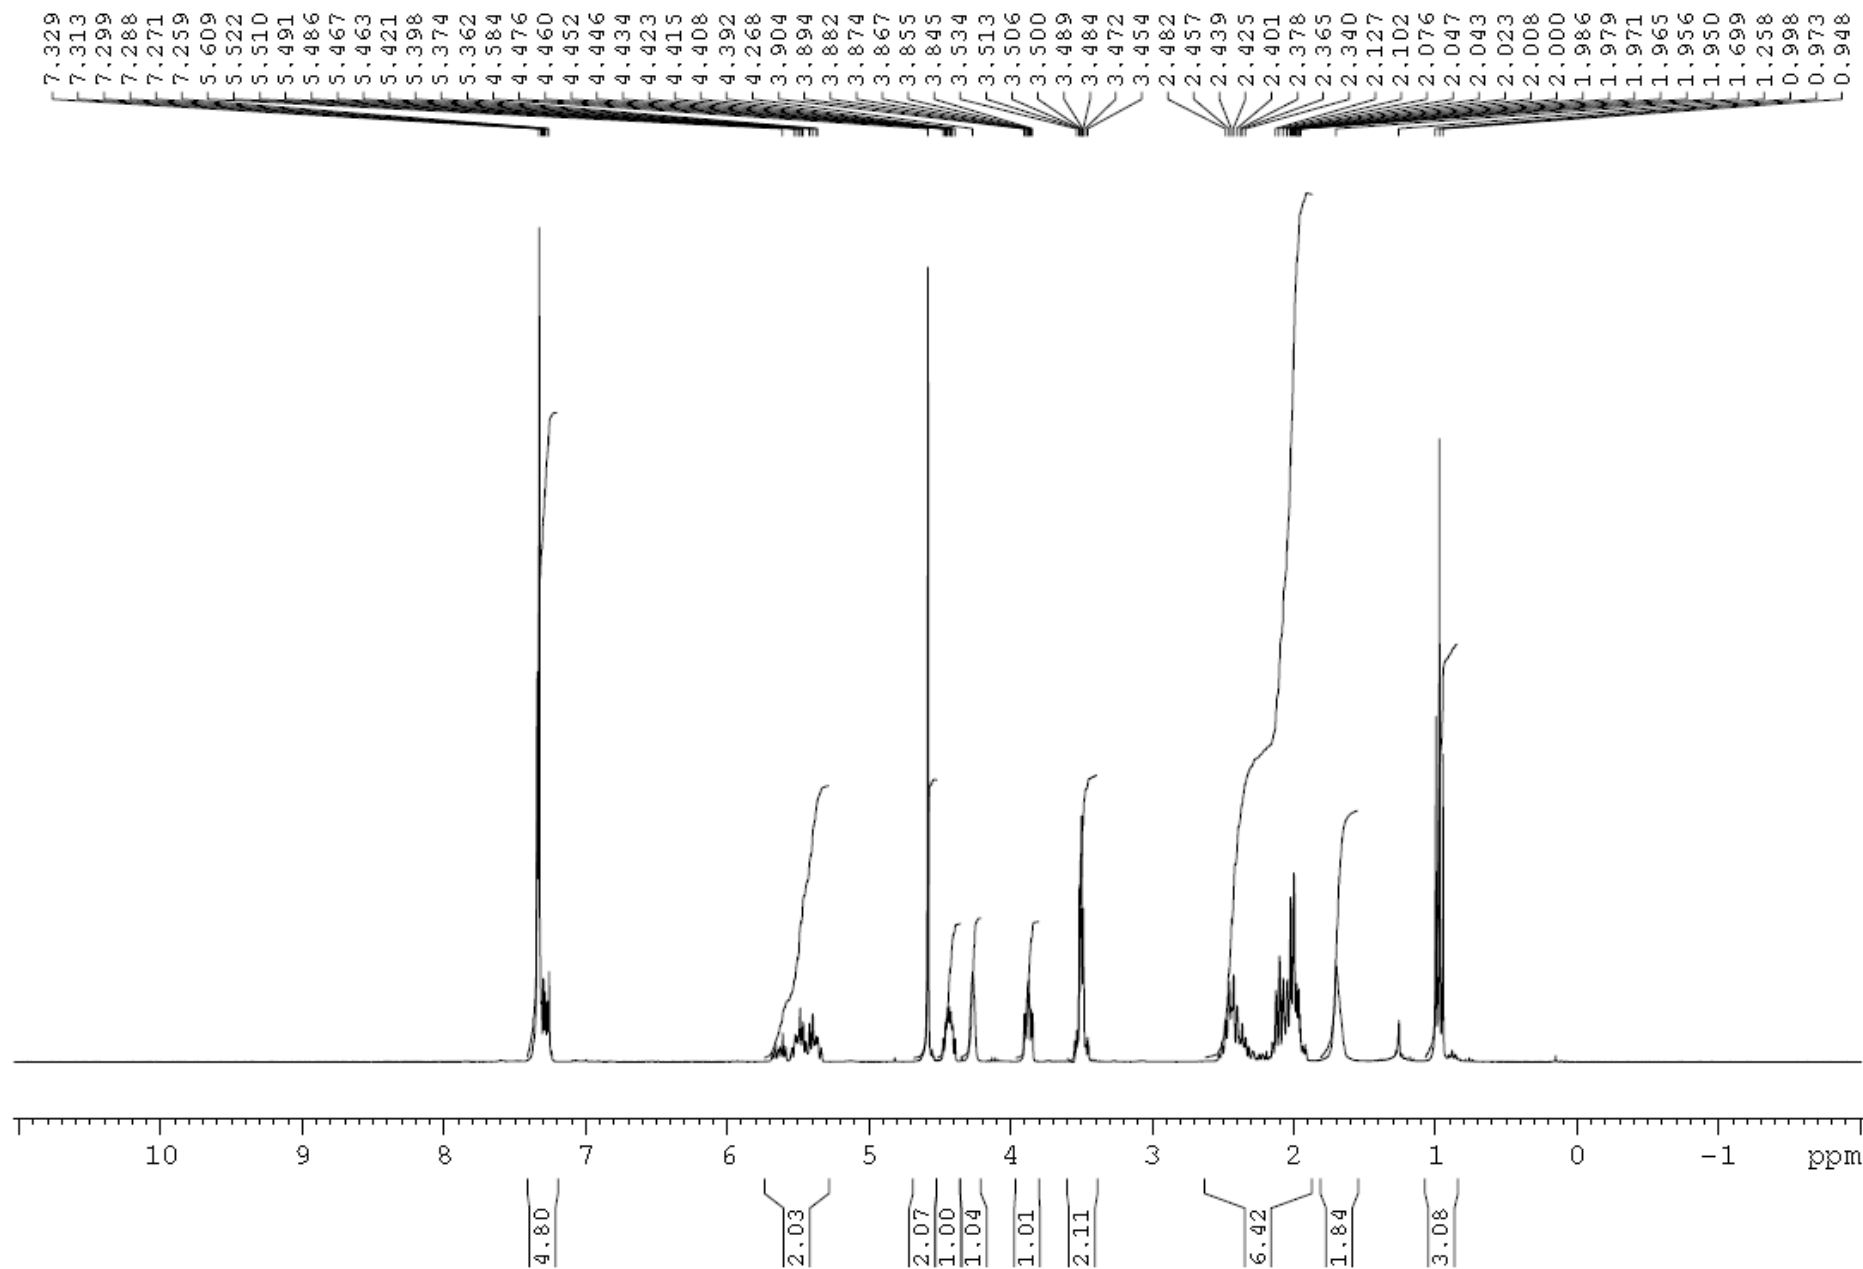

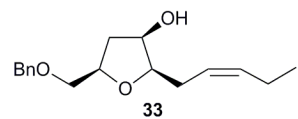

— 138.471  
 — 135.057  
 — 134.348  
 — 128.465  
 — 127.756  
 — 127.681  
 — 124.764  
 — 124.186

— 82.426  
 — 77.581  
 — 77.157  
 — 76.734  
 — 76.326  
 — 73.450  
 — 73.064  
 — 72.992  
 — 72.715

— 37.830  
 — 37.718  
 — 32.564  
 — 27.296  
 — 25.764  
 — 20.863  
 — 14.294  
 — 13.850

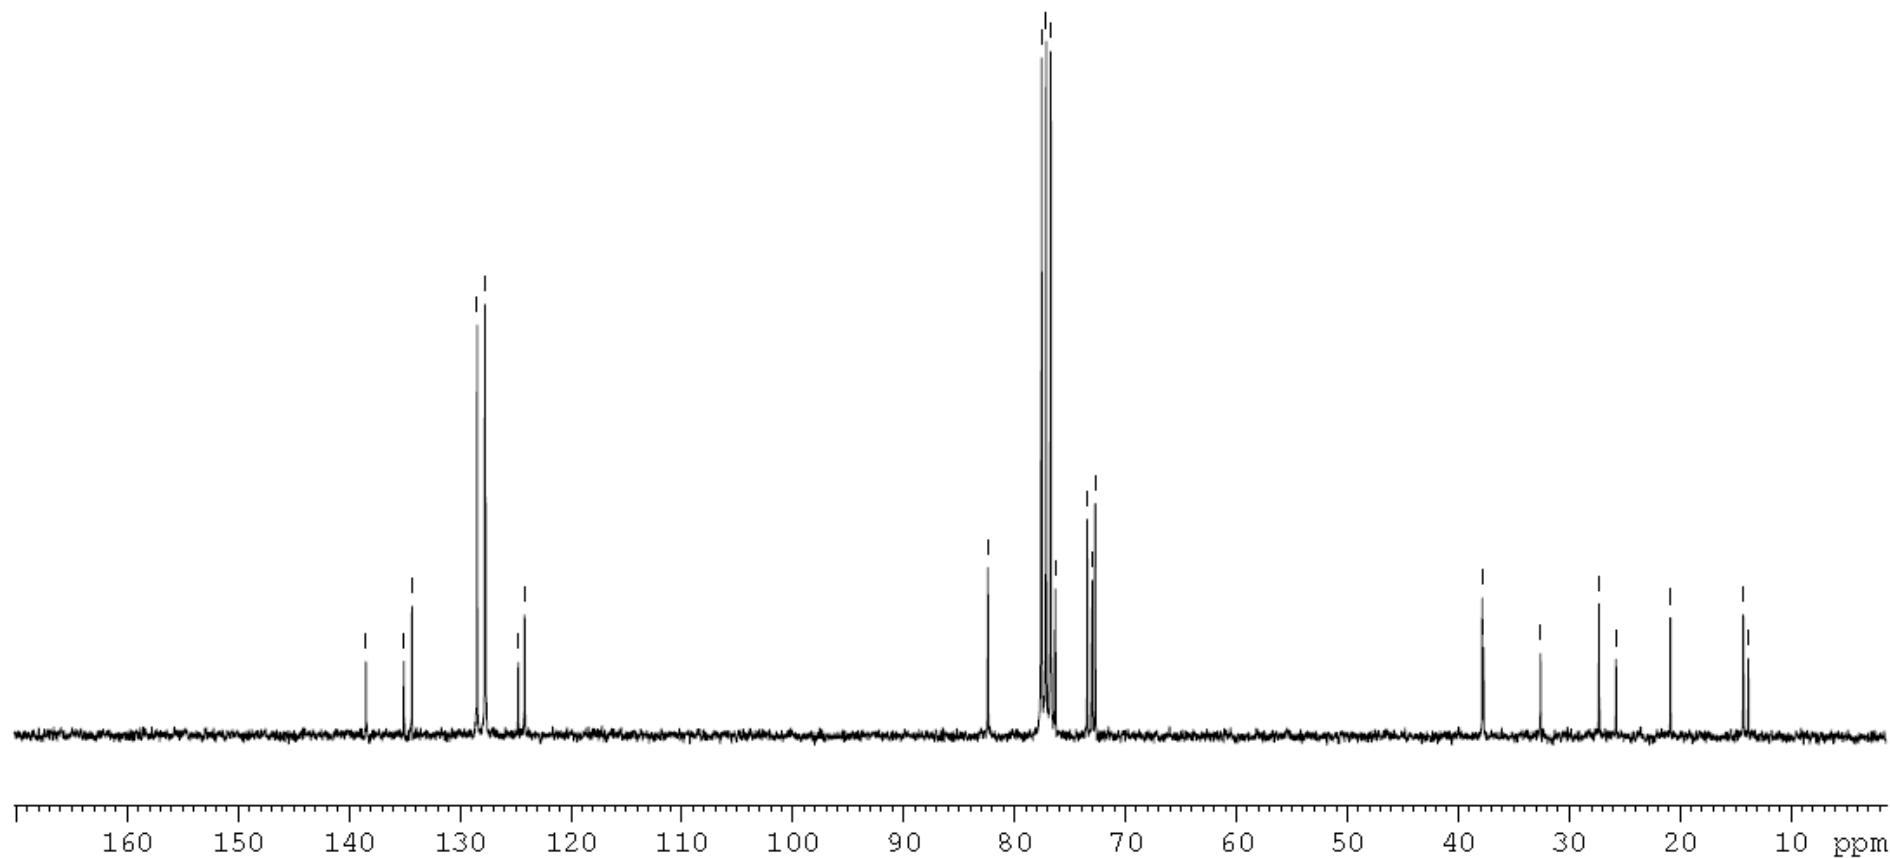

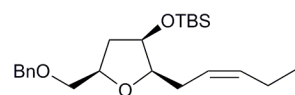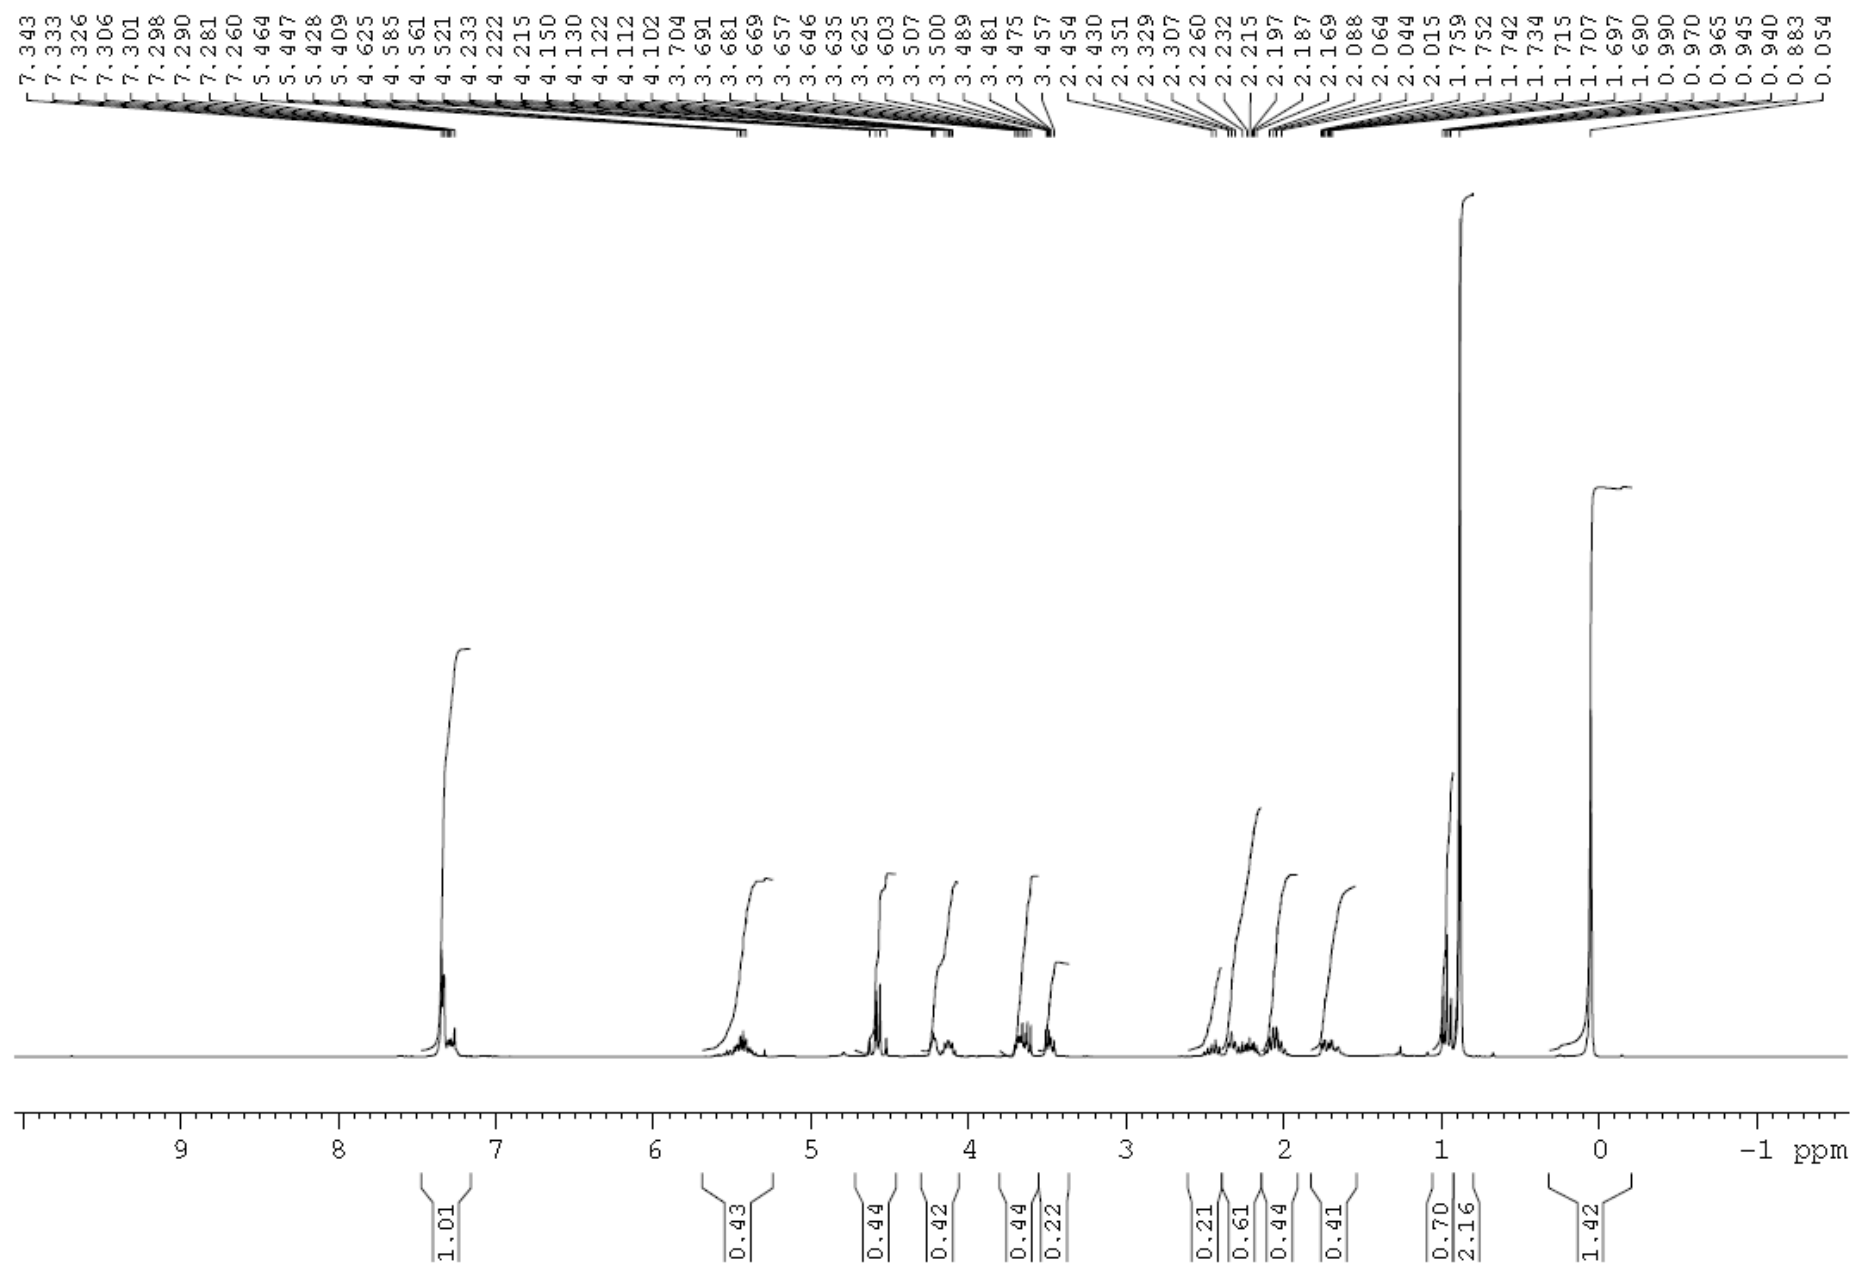

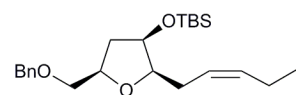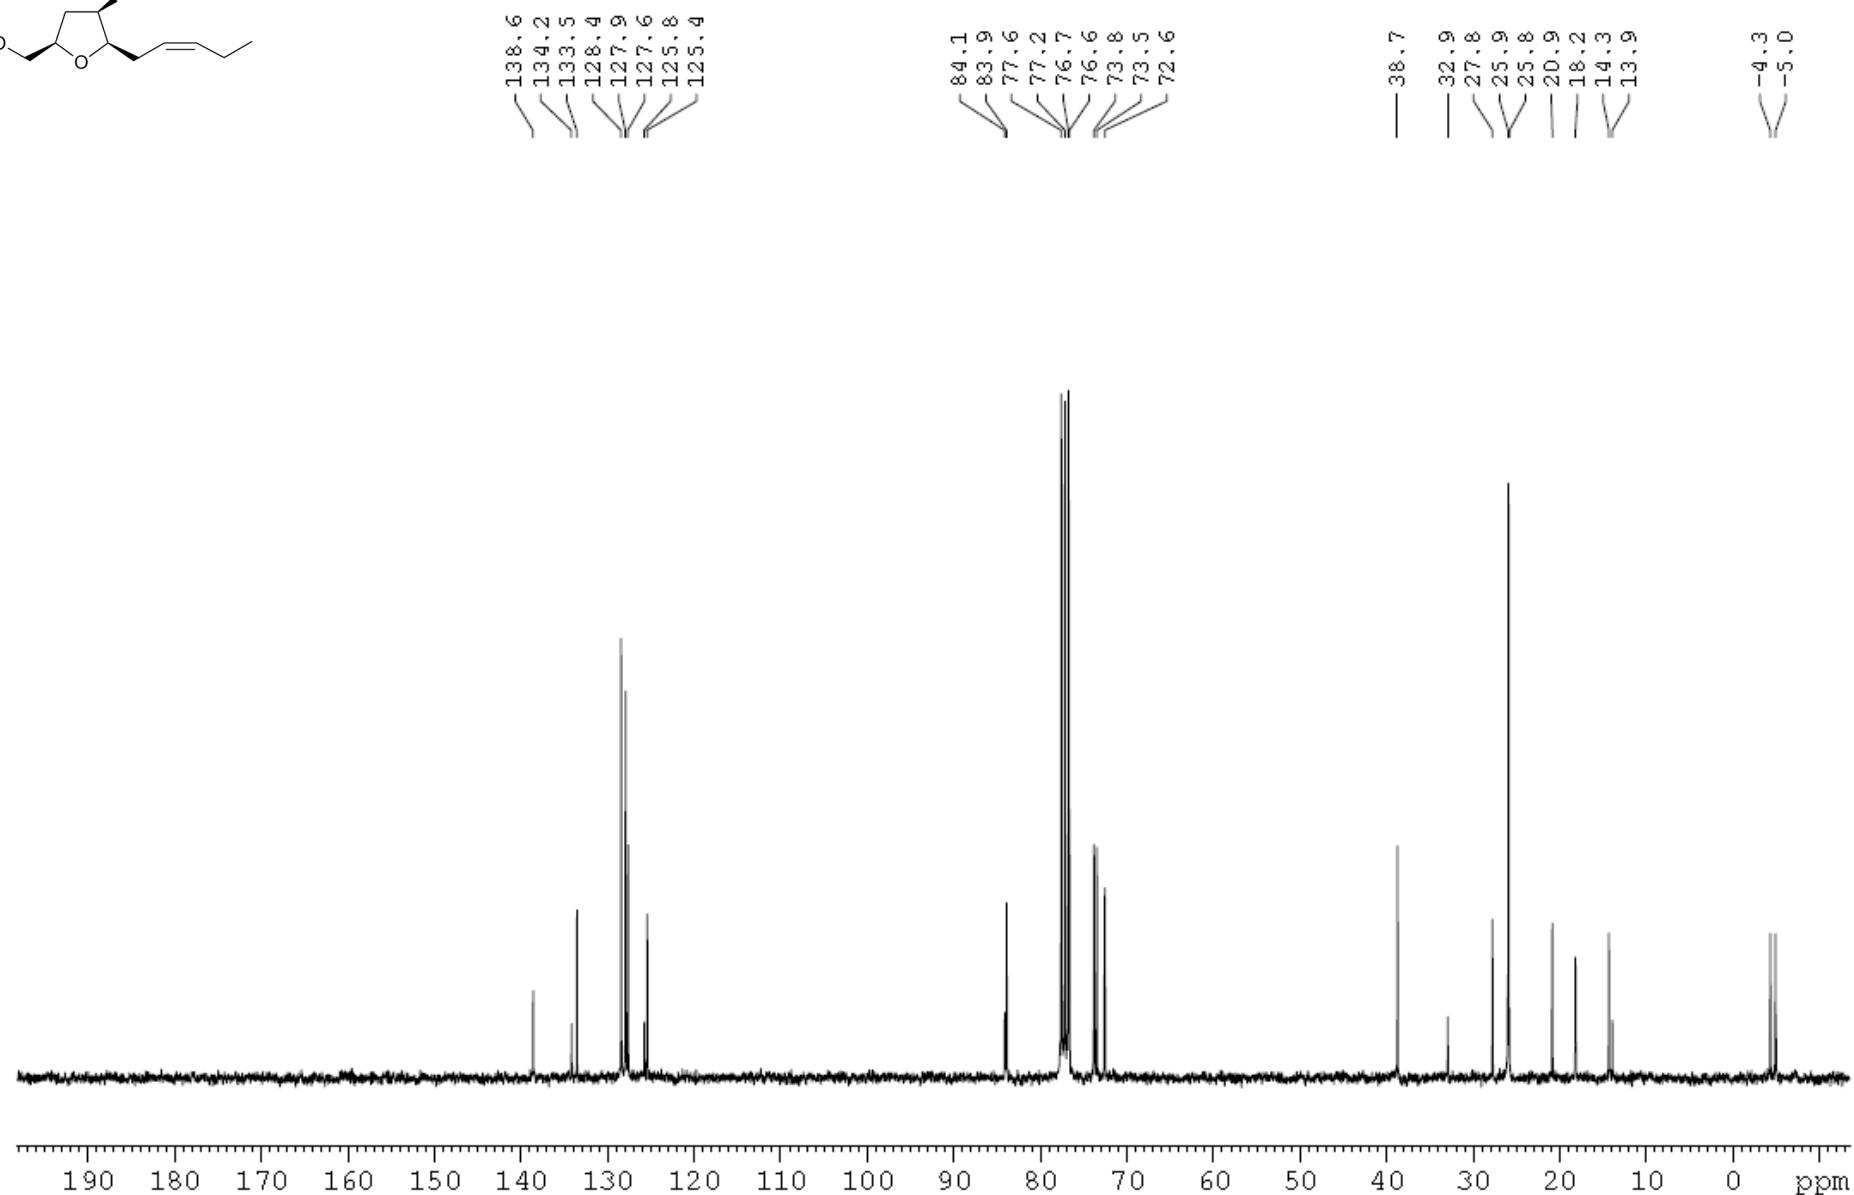

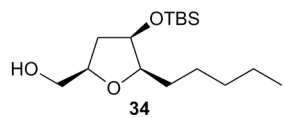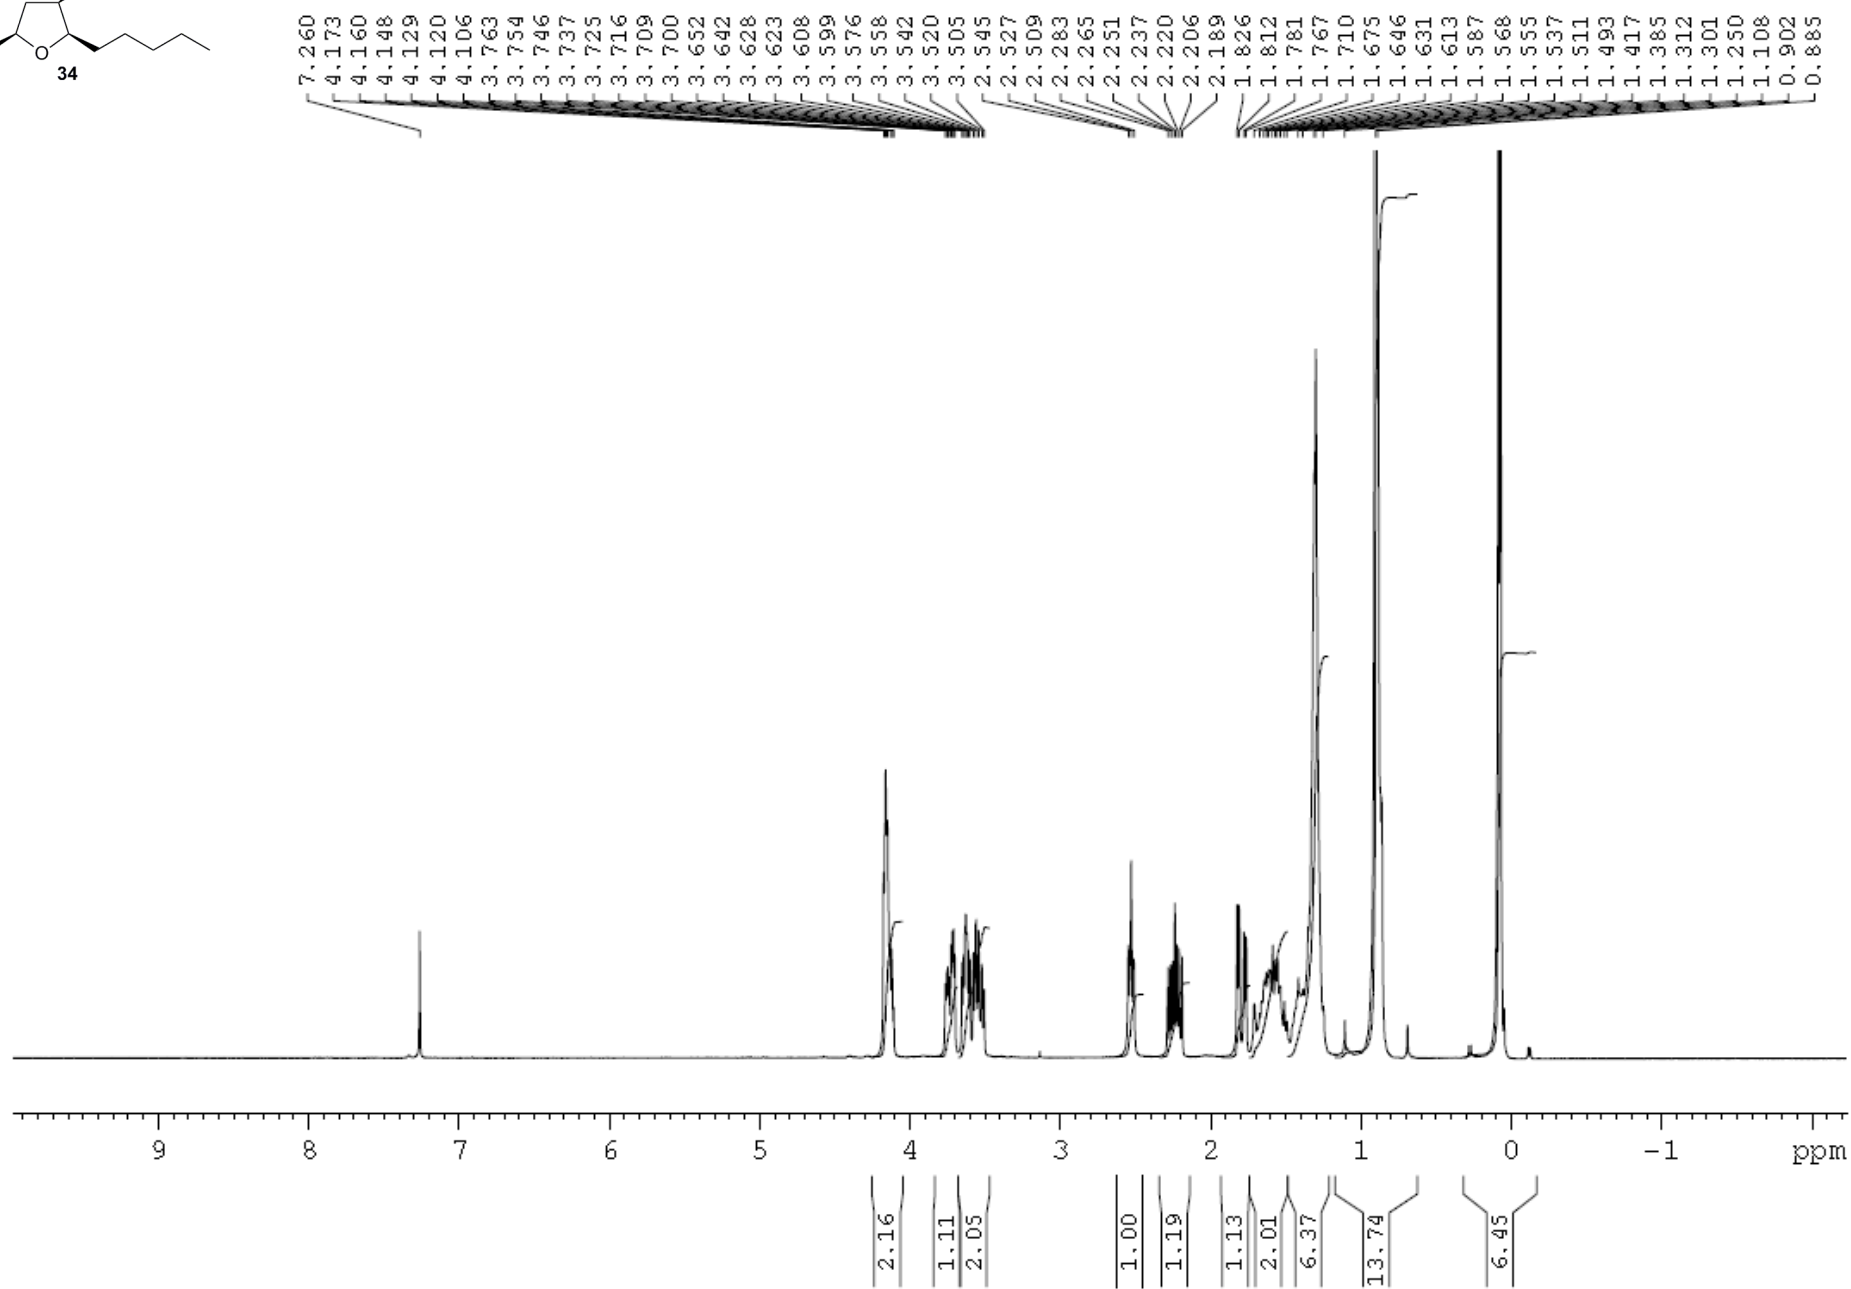

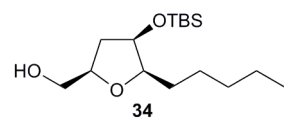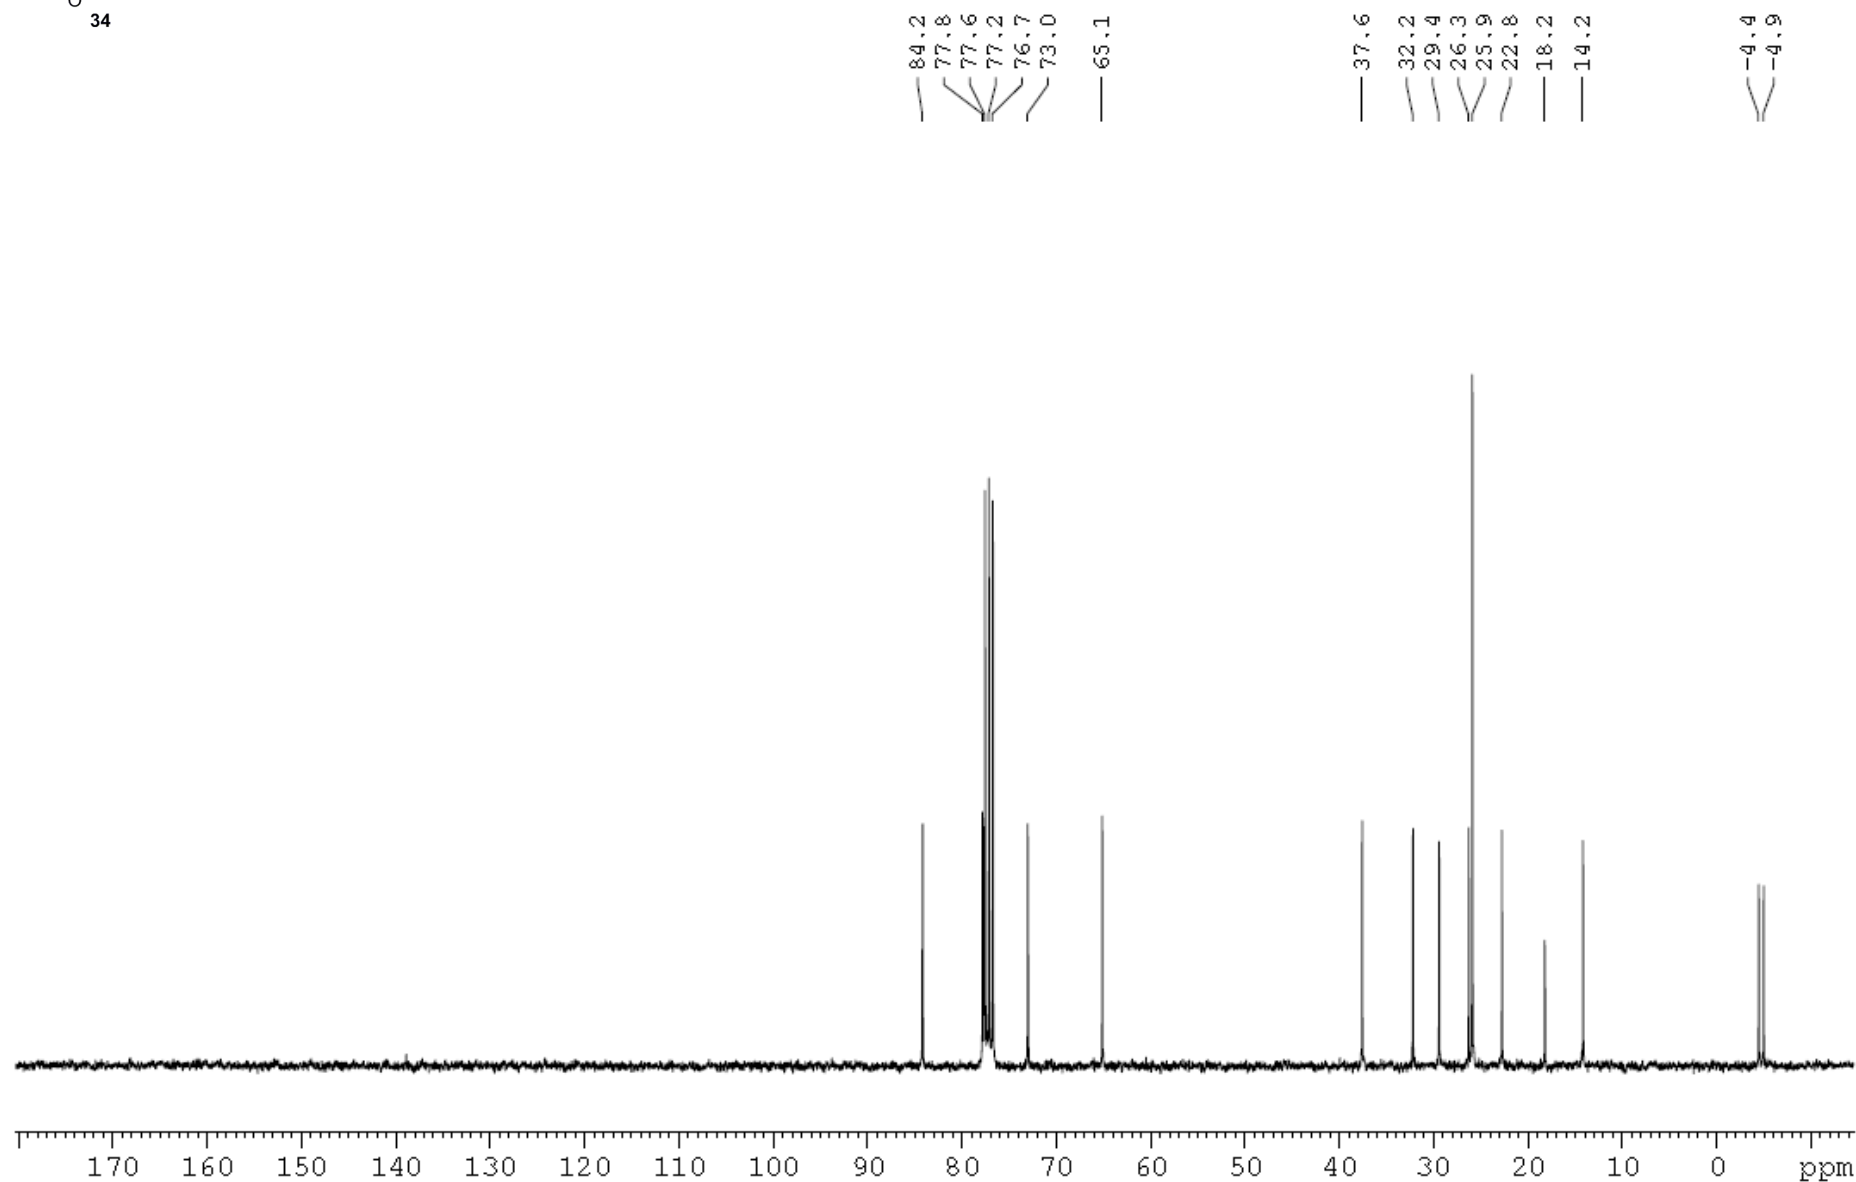

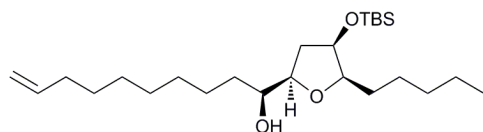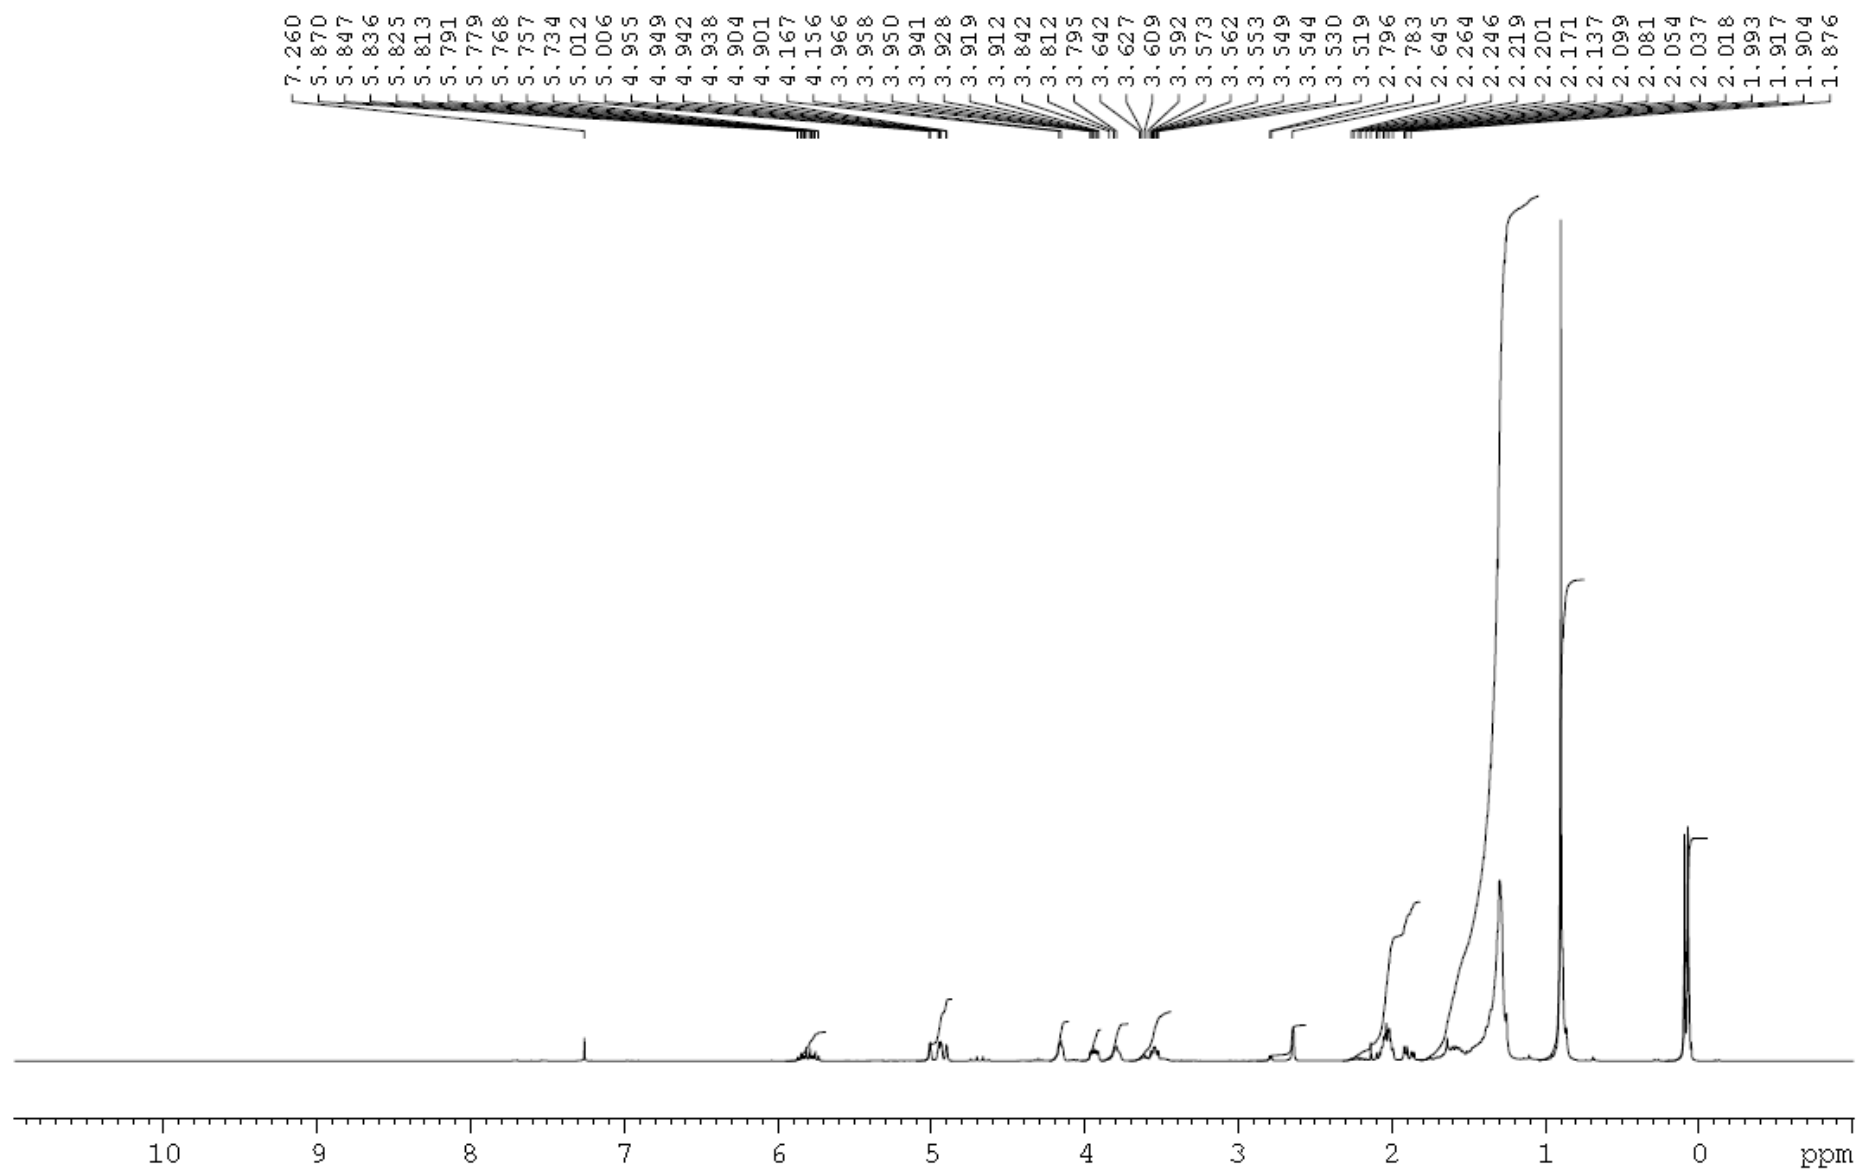



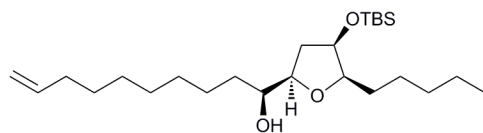

—139.4

—114.2

83.5  
80.7  
77.6  
77.2  
76.7  
72.8  
71.7

34.6  
33.9  
33.8  
32.3  
29.8  
29.5  
29.2  
29.1  
26.3  
26.0  
22.8  
18.3  
14.2

-4.4  
-4.9

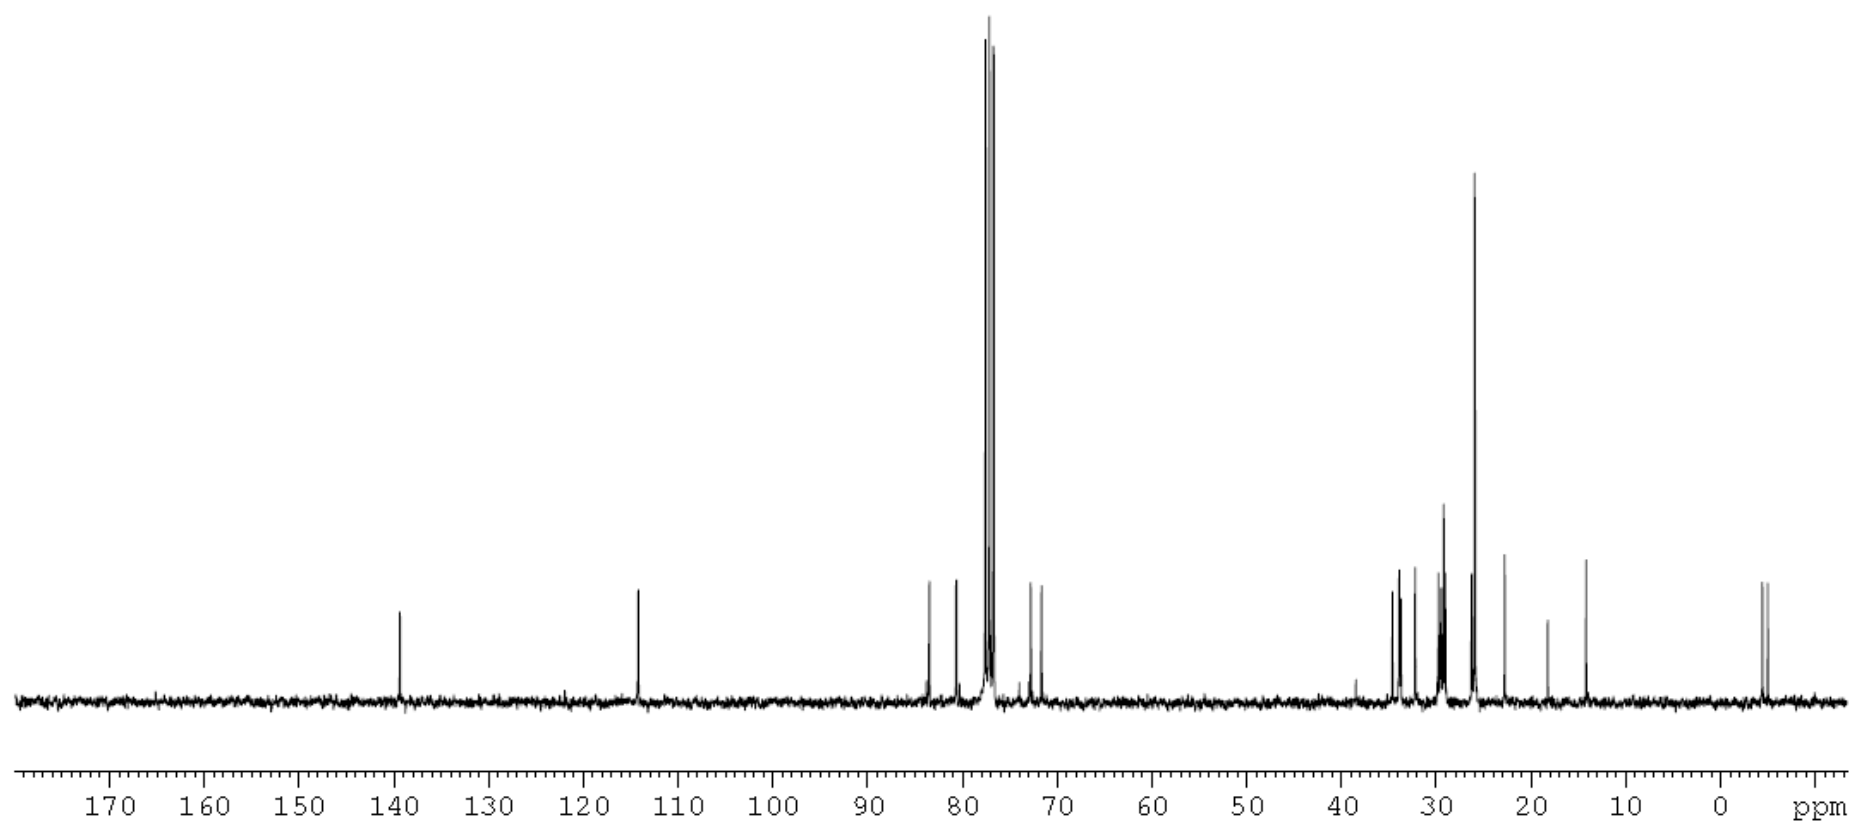

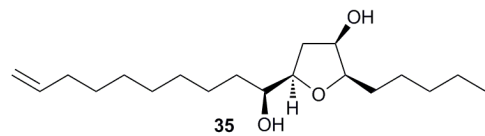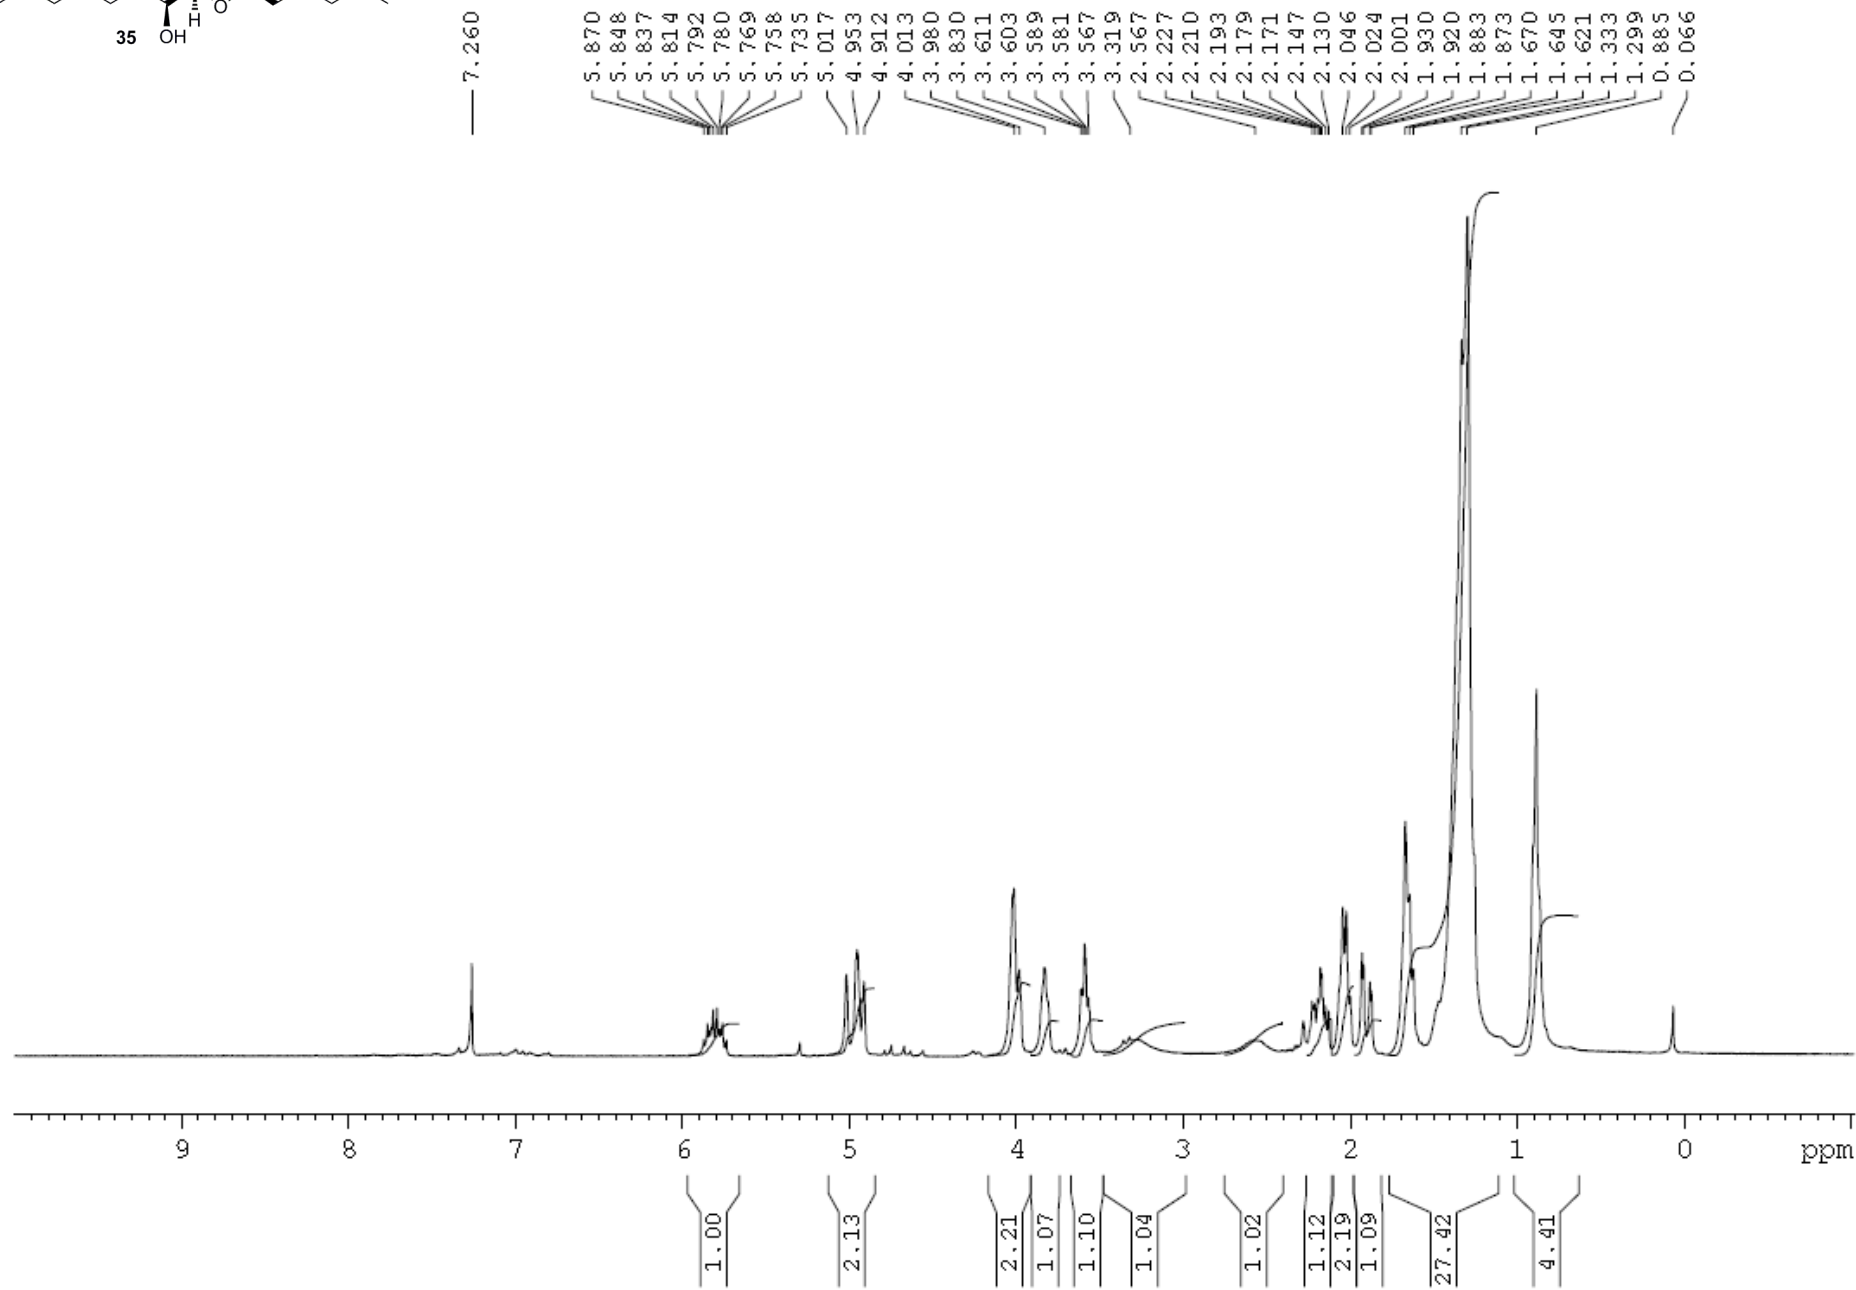

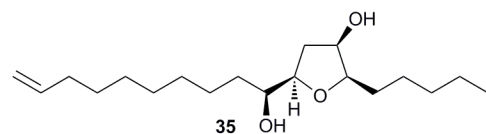

35

—139.1

—114.3

84.0

80.1

77.6

77.2

76.7

72.2

71.4

34.5

33.9

33.5

32.2

29.6

29.5

29.2

29.0

26.2

26.0

22.8

14.2

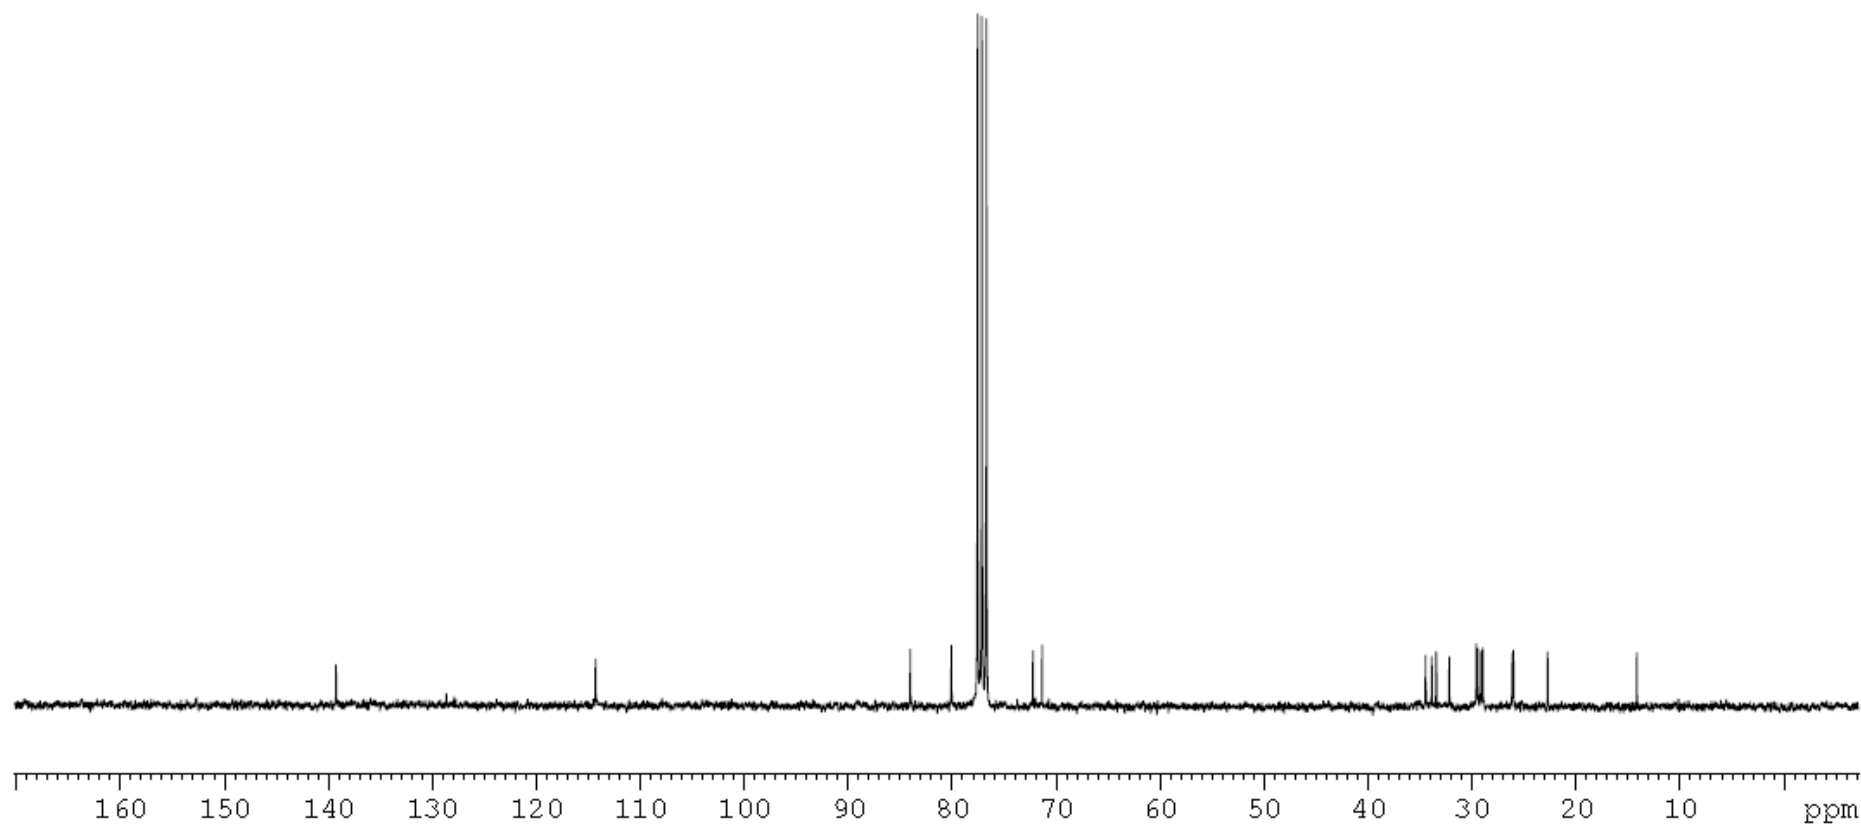

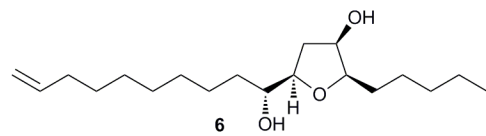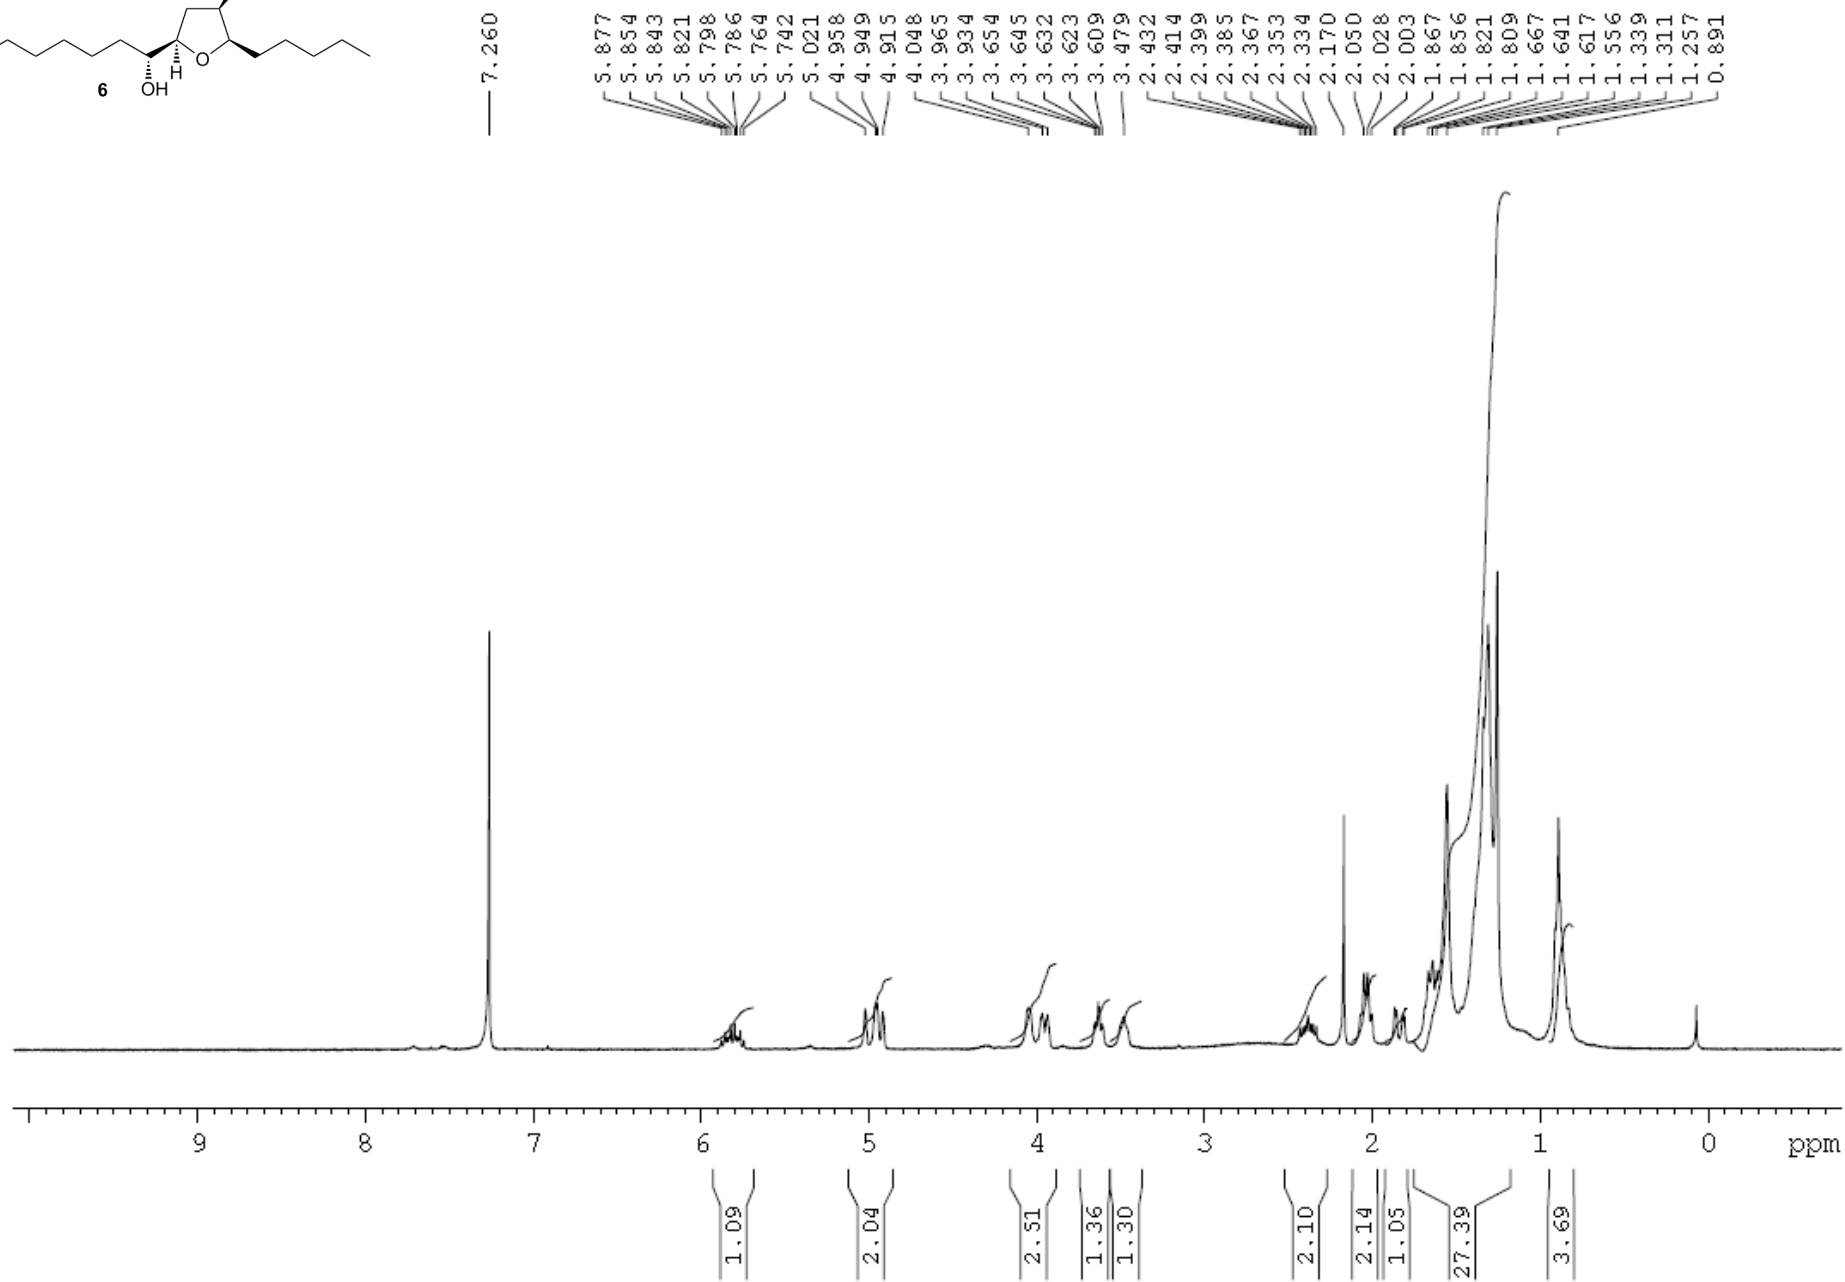

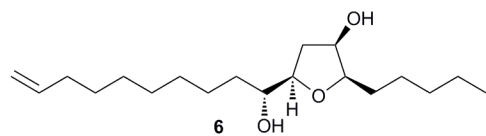

6

— 139.35

— 114.31

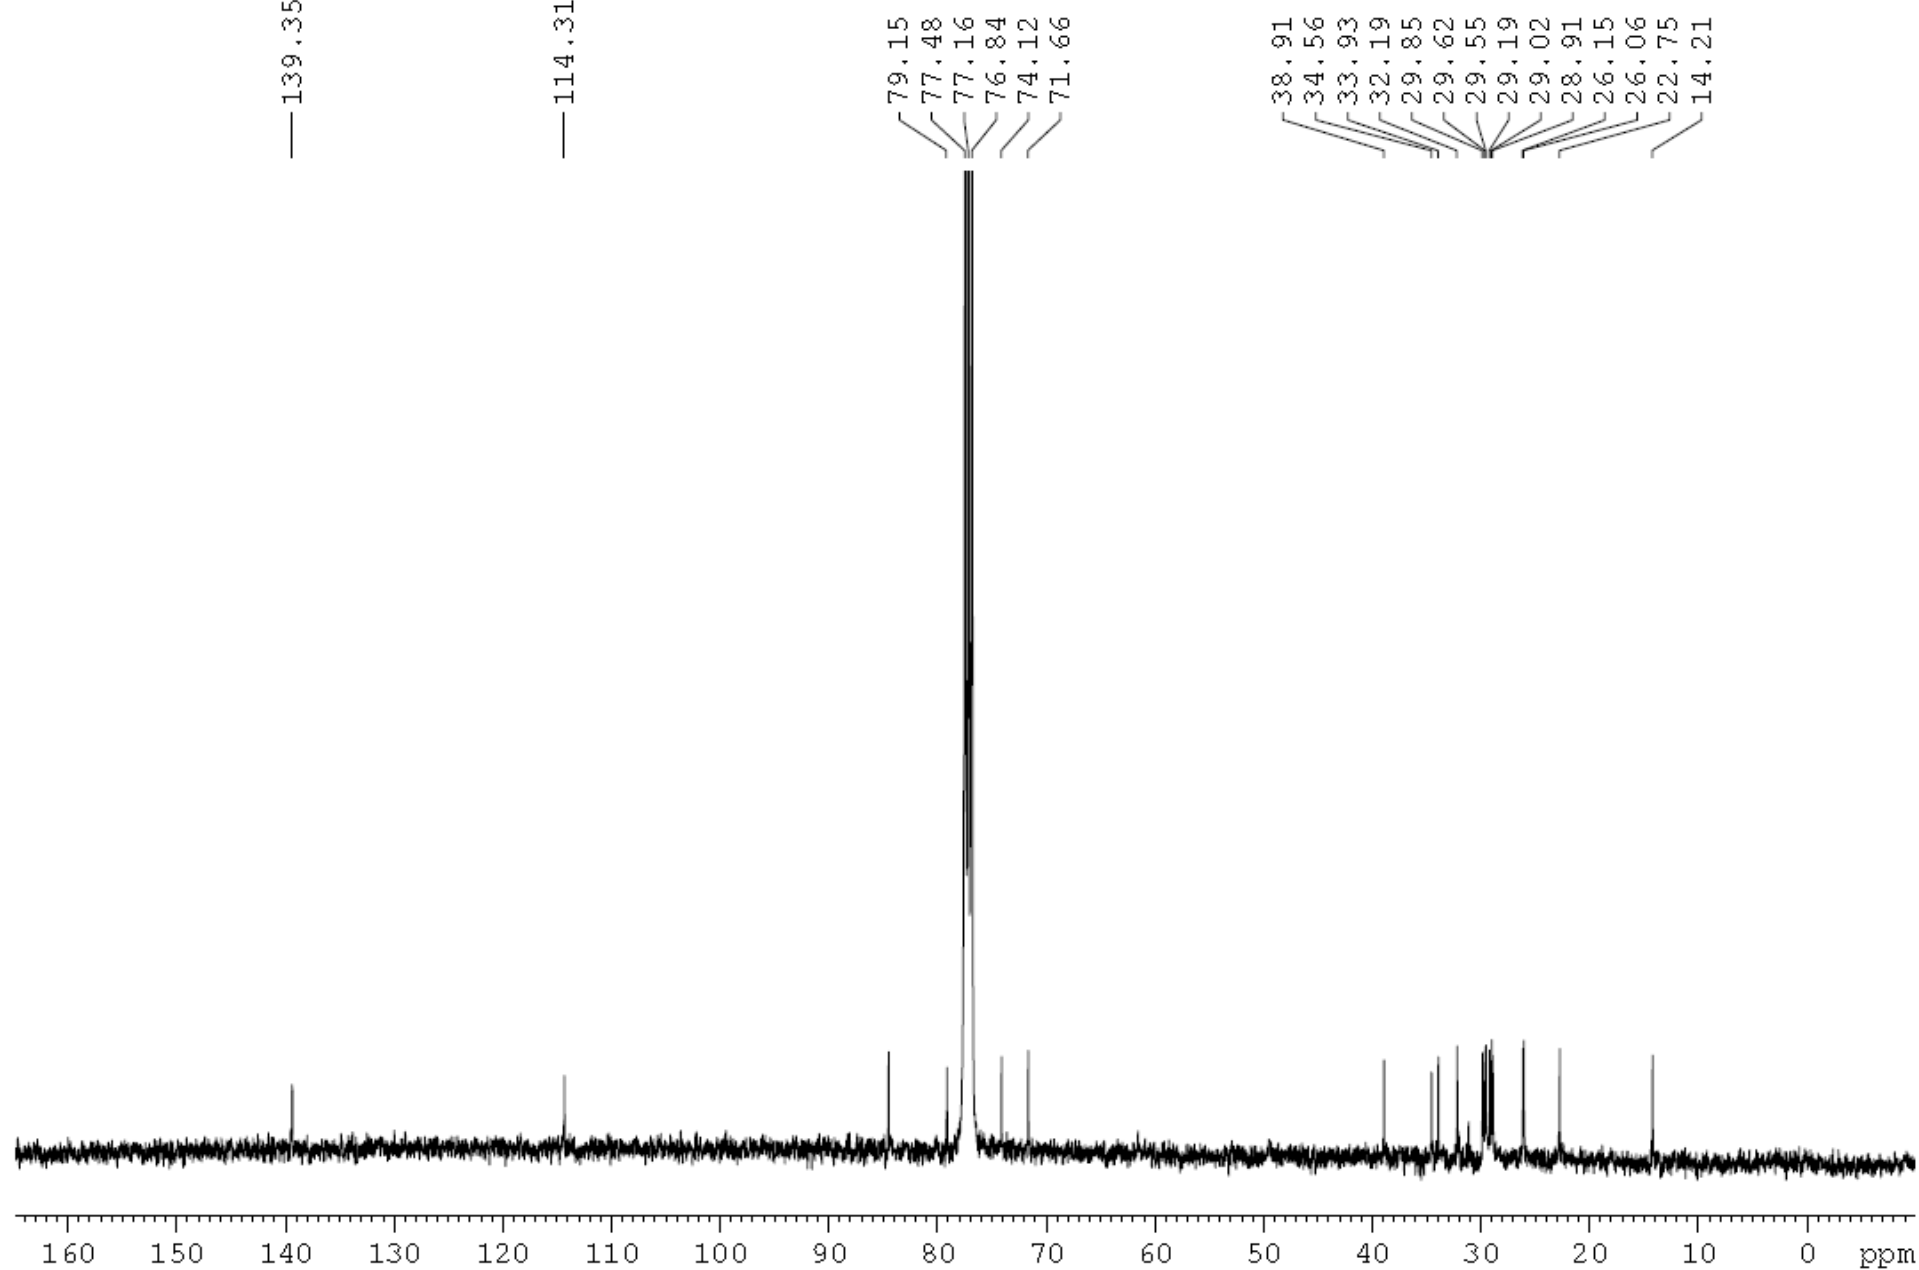

Supplement: c0ob00754d.pdf [file c0ob00754d.pdf]
